# Supplementary material for: Gold-catalysed tuning of reactivity in allenes: 9-endo hydroarylation versus formal 5-exo hydroalkylation
Source: Royal Society of Chemistry journal article supplement (doi:10.1039/c2cc37872h), 2012-12-20

## Supporting Information for the Paper

### Gold-catalyzed tuning of reactivity in allenes: 9-*endo* hydroarylation versus formal 5-*exo* hydroalkylation

Benito Alcaide,<sup>\*,1</sup> Pedro Almendros,<sup>\*,2</sup> Sara Cembellín,<sup>1</sup> Teresa Martínez del Campo,<sup>1</sup> and Israel Fernández<sup>3</sup>

<sup>1</sup>*Grupo de Lactamas y Heterociclos Bioactivos, Departamento de Química Orgánica I, Unidad Asociada al CSIC, Facultad de Química, Universidad Complutense de Madrid, 28040-Madrid, Spain*

<sup>2</sup>*Instituto de Química Orgánica General, CSIC, Juan de la Cierva 3, 28006-Madrid, Spain*

<sup>3</sup>*Departamento de Química Orgánica I, Facultad de Química, Universidad Complutense de Madrid, 28040-Madrid, Spain*

E-mail: alcaideb@quim.ucm.es; Palmendros@iqog.csic.es

**General Methods:** <sup>1</sup>H NMR and <sup>13</sup>C NMR spectra were recorded on a Bruker Avance AVIII-700 with cryoprobe, Bruker AMX-500, Bruker Avance-300, Varian VRX-300S or Bruker AC-200. NMR spectra were recorded in CDCl<sub>3</sub> solutions, except otherwise stated. Chemical shifts are given in ppm relative to TMS (<sup>1</sup>H, 0.0 ppm), or CDCl<sub>3</sub> (<sup>13</sup>C, 76.9 ppm). Low and high resolution mass spectra were taken on an AGILENT 6520 Accurate-Mass QTOF LC/MS spectrometer using the electronic impact (EI) or electrospray modes (ES) unless otherwise stated. IR spectra were recorded on a Bruker Tensor 27 spectrometer. Specific rotation [ $\alpha$ ]<sub>D</sub> is given in 10<sup>-1</sup> deg cm<sup>2</sup> g<sup>-1</sup> at 20 °C,

and the concentration ( $c$ ) is expressed in g per 100 mL. All commercially available compounds were used without further purification.

Starting (aryloxy)allenol-tethered 2-azetidiones were prepared from 4-oxoazetidine-2-carbaldehydes via regiocontrolled indium-mediated Barbier-type carbonyl–allenylation reaction in aqueous media using our methodology: B. Alcaide, P. Almendros, C. Aragoncillo, M. C. Redondo and M. R. Torres, *Chem. Eur. J.*, 2006, **12**, 1539.

**Preparation of Allenyl Acetate (+)-1a.** Triethylamine (0.94 mmol) and acetic anhydride (0.47 mmol) were sequentially added dropwise via syringe to a solution of the corresponding  $\alpha$ -allenlic alcohol (119 mg, 0.39 mmol) and DMAP (cat) in dichloromethane (4 mL) at 0 °C under argon. The resulting mixture was allowed to warm to room temperature and stirred for 2 h. The crude mixture was diluted with CH<sub>2</sub>Cl<sub>2</sub> (10 mL) and washed with saturated aqueous ammonium chloride (3 x 5 mL) and brine (3 x 5 mL). The organic layer was dried (MgSO<sub>4</sub>) and concentrated under reduced pressure. Chromatography of the residue eluting with ethyl acetate/hexanes (1:2) gave 78 mg (58%) of analytically pure  $\alpha$ -allenlic acetate (+)-**1a** as a colorless oil;  $[\alpha]_D = +7.7$  ( $c = 0.2$  in CHCl<sub>3</sub>); <sup>1</sup>H NMR (300 MHz, CDCl<sub>3</sub>):  $\delta = 0.96$  (d, 3H,  $J = 6.7$  Hz, Me), 1.00 (d, 3H,  $J = 6.7$  Hz, Me), 1.82 (t, 3H,  $J = 3.2$  Hz, Me), 2.03 (m, 1H, CH isobut), 2.13 (s, 3H, COMe), 2.96 (dd, 1H,  $J = 13.8, 6.1$  Hz, NCHH), 3.33 (dd, 1H,  $J = 13.7, 8.6$  Hz, NCHH), 4.26 (dd, 1H,  $J = 6.7, 5.0$  Hz, H4), 4.78 (m, 2H, =CH<sub>2</sub>), 5.28 (d, 1H,  $J = 5.0$  Hz, H3), 5.60 (dt, 1H,  $J = 6.7, 2.0$  Hz, OCH), 7.04 (t, 1H,  $J = 7.3$  Hz, Ar), 7.09 (d, 2H,  $J = 7.7$  Hz, Ar), 7.32 (m, 2H, Ar); <sup>13</sup>C NMR (75 MHz, CDCl<sub>3</sub>):  $\delta = 206.9$  (C=C=CH<sub>2</sub>), 169.7 (COMe), 166.6 (CO), 157.7, 129.5 (Ar, 2CH), 122.3 (Ar, CH), 115.8 (Ar, 2CH), 97.6, 80.0 (CH, H3), 77.6 (C=CH<sub>2</sub>), 72.4 (OCH), 58.5 (CH, H4), 49.4 (CH<sub>2</sub> isobut), 27.0 (CH isobut), 21.0 (Me), 20.4 (Me), 20.2 (Me), 16.4 (Me); IR (CHCl<sub>3</sub>):  $\nu = 2995, 1944, 1757, 1725$  cm<sup>-1</sup>; HRMS (ES): calcd for C<sub>20</sub>H<sub>25</sub>NO<sub>4</sub> [ $M$ ]<sup>+</sup>: 343.1784; found: 343.1797.

**General Procedure for the Synthesis of Methoxy Allenes 1b–h and 4a–e.** Tetrabutyl ammonium iodide (cat), 50% aqueous sodium hydroxide (18 mL) and dimethyl sulfate (0.60 mmol) were sequentially added at room temperature to a solution of the corresponding  $\alpha$ -allenol (0.92 mmol) in dichloromethane (18 mL). The reaction was stirred until disappearance of the starting material (TLC). Then aqueous ammonia (30%) was added (2.5 mL), before being partitioned between dichloromethane and water. The aqueous phase was extracted with dichloromethane (3 x 15 mL), the combined organic extracts were dried ( $\text{MgSO}_4$ ) and concentrated under reduced pressure. Chromatography of the residue using ethyl acetate/hexanes mixtures gave analytically pure compounds. Spectroscopic and analytical data for some representative pure forms of **1** and **4** follow.

**Methoxy Allene (+)-1b.** From 355 mg (1.18 mmol) of the corresponding  $\alpha$ -allenic alcohol, and after chromatography of the residue using hexanes/ethyl acetate (4:1) as eluent gave the methoxy allene (+)-**1b** (167 mg, 45%) as a colorless oil;  $[\alpha]_D = +11.2$  ( $c = 0.3$  in  $\text{CHCl}_3$ );  $^1\text{H NMR}$  (300 MHz,  $\text{CDCl}_3$ ):  $\delta = 0.92$  (d, 3H,  $J = 6.7$  Hz, Me), 0.96 (d, 3H,  $J = 6.7$  Hz, Me), 1.70 (t, 3H,  $J = 3.2$  Hz, Me), 2.06 (m, 1H, CH isobut), 3.14 (dd, 1H,  $J = 13.6, 6.3$  Hz, NCHH), 3.26 (dd, 1H,  $J = 13.4, 8.2$  Hz, NCHH), 3.33 (s, 3H, OMe), 4.00 (m, 1H, OCH), 4.02 (d, 1H,  $J = 5.9$  Hz, H4), 4.41 (m, 1H, =CHH), 4.62 (m, 1H, =CHH), 5.22 (d, 1H,  $J = 4.1$  Hz, H3), 7.00 (t, 1H,  $J = 7.3$  Hz, Ar), 7.02 (d, 2H,  $J = 6.7$  Hz, Ar), (m, 3H, Ar), 7.28 (m, 2H, Ar);  $^{13}\text{C NMR}$  (75 MHz,  $\text{CDCl}_3$ ):  $\delta = 208.3$  (C=C=CH<sub>2</sub>), 166.6 (CO), 158.0, 129.4 (Ar, 2CH), 121.9 (Ar, CH), 115.6 (Ar, 2CH), 94.7, 82.6 (CH, H3), 79.7 (OCH), 74.9 (C=CH<sub>2</sub>), 59.2 (CH, H4), 55.7 (OMe), 49.7 (NCH<sub>2</sub>), 27.0 (CH isobut), 20.4 (Me), 20.2 (Me), 14.4 (Me); IR ( $\text{CHCl}_3$ ):  $\nu = 2992, 1947, 1756$   $\text{cm}^{-1}$ ; HRMS (ES): calcd for  $\text{C}_{19}\text{H}_{25}\text{NO}_3$  [ $M$ ]<sup>+</sup>: 315.1834; found: 315.1832.

**Methoxy Allene (+)-1c.** From 322 mg (0.89 mmol) of the corresponding  $\alpha$ -allenic alcohol, and after chromatography of the residue using hexanes/ethyl acetate (4:1) as eluent gave the

methoxy allene (+)-**1c** (216 mg, 65%) as a colorless oil;  $[\alpha]_D = +16.7$  ( $c = 0.4$  in  $\text{CHCl}_3$ );  $^1\text{H NMR}$  (300 MHz,  $\text{CDCl}_3$ ):  $\delta = 0.92$  (d, 3H,  $J = 6.7$  Hz, Me), 0.98 (d, 3H,  $J = 6.7$  Hz, Me), 2.08 (m, 1H, CH isobut), 3.20 (dd, 1H,  $J = 13.6, 6.3$  Hz, NCHH), 3.32 (dd, 1H,  $J = 13.4, 8.3$  Hz, NCHH), 3.41 (s, 3H, OMe), 4.19 (dd, 1H,  $J = 9.1, 4.8$  Hz, H4), 4.59 (d, 1H,  $J = 9.1$  Hz, OCH), 4.83 (d, 1H,  $J = 12.4$  Hz, =CHH), 5.00 (d, 1H,  $J = 12.5$  Hz, =CHH), 5.14 (d, 1H,  $J = 4.8$  Hz, H3), 6.80 (d, 2H,  $J = 7.7$  Hz, Ar), 6.96 (t, 1H,  $J = 7.3$  Hz, Ar), 7.23 (m, 3H, Ar), 7.35 (t, 2H,  $J = 7.0$  Hz, Ar), 7.46 (d, 2H,  $J = 7.0$  Hz, Ar);  $^{13}\text{C NMR}$  (75 MHz,  $\text{CDCl}_3$ ):  $\delta = 210.5$  (C=C=CH<sub>2</sub>), 166.7 (CO), 157.9, 134.0, 129.2 (Ar, 2CH), 128.6 (Ar, CH), 127.2 (Ar, 3CH), 121.9 (Ar, CH), 115.7 (Ar, 3CH), 102.6, 81.5 (CH, H3), 79.6 (OCH), 78.1 (C=CH<sub>2</sub>), 59.6 (CH, H4), 55.6 (OMe), 49.8 (NCH<sub>2</sub>), 27.1 (CH isobut), 20.5 (Me), 20.2 (Me); IR ( $\text{CHCl}_3$ ):  $\nu = 2999, 1944, 1753$   $\text{cm}^{-1}$ ; HRMS (ES): calcd for  $\text{C}_{24}\text{H}_{27}\text{NO}_3$   $[M]^+$ : 377.1991; found: 377.1997.

**Methoxy Allene (+)-1d.** From 57 mg (0.17 mmol) of the corresponding  $\alpha$ -allenic alcohol, and after chromatography of the residue using hexanes/ethyl acetate (3:1) as eluent gave the methoxy allene (+)-**1d** (31 mg, 52%) as a colorless oil;  $[\alpha]_D = +15.0$  ( $c = 0.1$  in  $\text{CHCl}_3$ );  $^1\text{H NMR}$  (300 MHz,  $\text{CDCl}_3$ ):  $\delta = 1.63$  (t, 3H,  $J = 3.2$  Hz, Me), 3.17 (s, 3H, OMe), 3.91 (dd, 1H,  $J = 9.2, 4.8$  Hz, H4), 4.03 (d, 1H,  $J = 9.2$  Hz, OCH), 4.32 (m, 1H, =CHH), 4.46 (d, 1H,  $J = 14.6$  Hz, NCHH), 4.57 (m, 1H, =CHH), 4.69 (d, 1H,  $J = 14.6$  Hz, NCHH), 5.19 (d, 1H,  $J = 4.8$  Hz, H3), 7.00 (t, 1H,  $J = 7.7$  Hz, Ar), 7.02 (d, 2H,  $J = 8.0$  Hz, Ar), 7.30 (m, 3H, Ar), 7.36 (m, 4H, Ar);  $^{13}\text{C NMR}$  (75 MHz,  $\text{CDCl}_3$ ):  $\delta = 208.3$  (C=C=CH<sub>2</sub>), 166.6 (CO), 136.4, 129.3 (Ar, 2CH), 128.6 (Ar, 3CH), 128.5 (Ar, 2CH), 127.5, 122.0 (Ar, CH), 115.6 (Ar, 2CH), 94.5, 82.4 (CH, H3), 79.9 (OCH), 74.9 (C=CH<sub>2</sub>), 58.6 (CH, H4), 55.6 (OMe), 45.9 (NCH<sub>2</sub>), 14.9 (Me); IR ( $\text{CHCl}_3$ ):  $\nu = 2996, 1945, 1759$   $\text{cm}^{-1}$ ; HRMS (ES): calcd for  $\text{C}_{22}\text{H}_{23}\text{NO}_3$   $[M]^+$ : 349.1678; found: 349.1689.

**Methoxy Allene (+)-1e.** From 215 mg (0.54 mmol) of the corresponding  $\alpha$ -allenic alcohol, and after chromatography of the residue using hexanes/ethyl acetate (3:1) as eluent gave the

methoxy allene (+)-**1e** (120 mg, 54%) as a colorless oil;  $[\alpha]_D = +8.7$  ( $c = 0.1$  in  $\text{CHCl}_3$ );  $^1\text{H}$  NMR (300 MHz,  $\text{CDCl}_3$ ):  $\delta = 3.18$  (s, 1H, OMe), 4.00 (dd, 1H,  $J = 9.4, 4.8$  Hz, H4), 4.39 (d, 1H,  $J = 14.6$  Hz, NCHH), 4.47 (d, 1H,  $J = 9.3$  Hz OCH), 4.59 (d, 1H,  $J = 12.5$  Hz, =CHH), 4.69 (d, 1H,  $J = 14.6$  Hz, NCHH), 4.84 (d, 1H,  $J = 12.5$  Hz, =CHH), 5.00 (d, 1H,  $J = 5.0$  Hz, H3), 6.70 (d, 2H,  $J = 7.9$  Hz, Ar), 6.88 (t, 1H,  $J = 7.3$  Hz, Ar), 7.18 (m, 6H, Ar), 7.25 (m, 6H, Ar);  $^{13}\text{C}$  NMR (75 MHz,  $\text{CDCl}_3$ ):  $\delta = 210.6$  (C=C=CH<sub>2</sub>), 166.2 (CO), 157.8, 136.2, 134.2, 129.2 (Ar, 2CH), 128.6 (Ar, 4CH), 128.5 (Ar, 2CH), 128.4 (Ar, CH), 127.5 (Ar, CH), 127.2 (Ar, 2CH), 121.9 (Ar, CH), 115.7 (Ar, 2CH), 102.1, 81.6 (CH, H3), 79.9 (OCH), 77.9 (C=CH<sub>2</sub>), 58.6 (CH, H4), 55.5 (OMe), 46.1 (NCH<sub>2</sub>); IR ( $\text{CHCl}_3$ ):  $\nu = 2993, 1946, 1756$   $\text{cm}^{-1}$ ; HRMS (ES): calcd for  $\text{C}_{27}\text{H}_{25}\text{NO}_3$   $[M]^+$ : 411.1834; found: 411.1846.

**Methoxy Allene (+)-1f.** From 314 mg (1.09 mmol) of the corresponding  $\alpha$ -allenic alcohol, and after chromatography of the residue using hexanes/ethyl acetate (4:1) as eluent gave the methoxy allene (+)-**1f** (210 mg, 64%) as a colorless oil;  $[\alpha]_D = +15.2$  ( $c = 0.4$  in  $\text{CHCl}_3$ );  $^1\text{H}$  NMR (300 MHz,  $\text{CDCl}_3$ ):  $\delta = 1.30$  (d, 3H,  $J = 6.6$  Hz, Me), 1.39 (d, 3H,  $J = 6.6$  Hz, Me), 1.70 (t, 3H,  $J = 3.2$  Hz, Me), 3.34 (s, 3H, OMe), 3.90 (sept, 1H,  $J = 6.1$  Hz, NCH), 3.92 (m, 1H, OCH), 4.01 (t, 1H,  $J = 4.7$  Hz, H4), 4.40 (m, 1H, =CHH), 4.61 (m, 1H, =CHH), 5.14 (d, 1H,  $J = 4.5$  Hz, H3), 6.99 (t, 1H,  $J = 7.3$  Hz, Ar), 7.03 (d, 2H,  $J = 7.7$  Hz, Ar), 7.28 (m, 2H, Ar);  $^{13}\text{C}$  NMR (75 MHz,  $\text{CDCl}_3$ ):  $\delta = 208.5$  (C=C=CH<sub>2</sub>), 165.8 (CO), 158.0, 129.8 (Ar, 2CH), 121.9 (Ar, CH), 115.7 (Ar, 2CH), 94.5, 82.5 (CH, H3), 79.1 (OCH), 74.8 (C=CH<sub>2</sub>), 58.6 (CH, H4), 55.6 (OMe), 46.0 (NCH), 21.2 (Me), 19.9 (Me), 14.3 (Me); IR ( $\text{CHCl}_3$ ):  $\nu = 2998, 1948, 1753$   $\text{cm}^{-1}$ ; HRMS (ES): calcd for  $\text{C}_{18}\text{H}_{23}\text{NO}_3$   $[M]^+$ : 301.1678; found: 301.1684.

**Methoxy Allene (+)-1g.** From 259 mg (0.74 mmol) of the corresponding  $\alpha$ -allenic alcohol, and after chromatography of the residue using hexanes/ethyl acetate (4:1) as eluent gave the methoxy allene (+)-**1g** (240 mg, 89%) as a colorless oil;  $[\alpha]_D = +11.9$  ( $c = 0.4$  in  $\text{CHCl}_3$ );  $^1\text{H}$  NMR

(300 MHz, CDCl<sub>3</sub>):  $\delta$  = 1.34 (d, 3H,  $J$  = 6.7 Hz, Me), 1.40 (d, 3H,  $J$  = 6.8 Hz, Me), 3.43 (s, 3H, OMe), 3.95 (sept, 1H,  $J$  = 6.9 Hz, NCH), 4.21 (dd, 1H,  $J$  = 9.2, 5.0 Hz, H4), 4.51 (d, 1H,  $J$  = 9.2 Hz, OCH), 4.82 (d, 1H,  $J$  = 12.4 Hz, =CHH), 5.00 (d, 1H,  $J$  = 12.4 Hz, =CHH), 5.05 (d, 1H,  $J$  = 5.0 Hz, H3), 6.78 (d, 2H,  $J$  = 7.7 Hz, Ar), 6.96 (t, 1H,  $J$  = 7.3 Hz, Ar), 7.23 (m, 3H, Ar), 7.34 (t, 2H,  $J$  = 7.0 Hz, Ar), 7.47 (d, 2H,  $J$  = 7.1 Hz, Ar); <sup>13</sup>C NMR (75 MHz, CDCl<sub>3</sub>):  $\delta$  = 210.7 (C=C=CH<sub>2</sub>), 165.9 (CO), 157.9, 134.7, 129.2 (Ar, 2CH), 128.5 (Ar, 3CH), 127.2 (Ar, 2CH), 121.8 (Ar, CH), 115.7 (Ar, 2CH), 102.5, 81.5 (CH, H3), 79.1 (OCH), 78.0 (C=CH<sub>2</sub>), 59.2 (CH, H4), 55.6 (OMe), 46.1 (NCH), 21.4 (Me), 20.0 (Me); IR (CHCl<sub>3</sub>):  $\nu$  = 2995, 1945, 1748 cm<sup>-1</sup>; HRMS (ES): calcd for C<sub>23</sub>H<sub>25</sub>NO<sub>3</sub> [ $M$ ]<sup>+</sup>: 363.1834; found: 363.1836.

**Methoxy Allene (+)-1h.** From 105 mg (0.29 mmol) of the corresponding  $\alpha$ -allenic alcohol, and after chromatography of the residue using hexanes/ethyl acetate (3:1) as eluent gave the methoxy allene (+)-**1h** (52 mg, 49%) as a colorless oil; [ $\alpha$ ]<sub>D</sub> = +9.0 ( $c$  = 0.1 in CHCl<sub>3</sub>); <sup>1</sup>H NMR (300 MHz, CDCl<sub>3</sub>):  $\delta$  = 1.76 (s, 3H, Me), 3.38 (s, 3H, OMe), 3.91 (d, 1H,  $J$  = 15.2 Hz, NCHH), 4.21 (dd, 1H,  $J$  = 9.2, 4.8 Hz, H4), 4.14 (d, 1H,  $J$  = 15.4 Hz, NCHH), 4.61 (d, 1H,  $J$  = 9.2 Hz, OCH), 4.78 (d, 1H,  $J$  = 12.4 Hz, =CHH), 4.94 (d, 2H,  $J$  = 13.6 Hz, =CH<sub>2</sub>), 4.98 (d, 1H,  $J$  = 12.5 Hz, =CHH), 5.17 (d, 1H,  $J$  = 4.8 Hz, H3), 6.81 (d, 2H,  $J$  = 7.7 Hz, Ar), 6.97 (t, 1H,  $J$  = 7.4 Hz, Ar), 7.28 (m, 5H, Ar), 7.46 (d, 2H,  $J$  = 7.3 Hz, Ar); <sup>13</sup>C NMR (75 MHz, CDCl<sub>3</sub>):  $\delta$  = 210.5 (C=C=CH<sub>2</sub>), 166.5 (CO), 157.8, 139.6, 134.4, 129.2 (Ar, 2CH), 128.5 (Ar, 2CH), 127.2 (Ar, 3CH), 121.9 (Ar, CH), 115.7 (Ar, 2CH), 113.2 (C=CH<sub>2</sub>), 102.4, 81.3 (CH, H3), 79.8 (OCH), 78.1 (C=CH<sub>2</sub>), 58.8 (CH, H4), 55.4 (OMe), 47.8 (NCH<sub>2</sub>), 20.6 (Me); IR (CHCl<sub>3</sub>):  $\nu$  = 2997, 1946, 1758 cm<sup>-1</sup>; HRMS (ES): calcd for C<sub>24</sub>H<sub>25</sub>NO<sub>3</sub> [ $M$ ]<sup>+</sup>: 375.1834; found: 375.1832.

Allenes **4** were prepared from 3-*O*-(aryl) glucofuranosides through selective removal of the 5,6-*O*-isopropylidene group, oxidation, and carbonyl–allenylation. For the synthesis of related

starting glucofuranosides see: N. D. Adhikary and P. Chattopadhyay, *Eur. J. Org. Chem.*, 2011, 7346.

**Methoxy Allene (–)-4a.** From 150 mg (0.47 mmol) of the corresponding  $\alpha$ -allenic alcohol, and after chromatography of the residue using hexanes/ethyl acetate (8:1) as eluent gave the methoxy allene (–)-**4a** (124 mg, 79%) as a colorless oil;  $[\alpha]_D = -22.1$  ( $c = 0.1$  in  $\text{CHCl}_3$ );  $^1\text{H}$  NMR (300 MHz,  $\text{CDCl}_3$ ):  $\delta = 1.23$  (s, 3H, Me), 1.44 (s, 3H, Me), 1.66 (t, 3H,  $J = 3.0$  Hz, Me), 3.08 (s, 3H, OMe), 4.01 (d, 1H,  $J = 9.5$  Hz, OCH), 4.23 (dd, 1H,  $J = 9.5, 2.9$  Hz, H4), 4.53 (d, 1H,  $J = 3.8$  Hz, H2), 4.68 (m, 2H,  $=\text{CH}_2$ ), 4.69 (m, 1H, H3), 5.88 (d, 1H,  $J = 3.8$  Hz, H1), 6.91 (t, 1H,  $J = 7.4$  Hz, Ar), 6.93 (d, 2H,  $J = 8.0$  Hz, Ar), 7.23 (t, 2H,  $J = 7.2$  Hz, Ar);  $^{13}\text{C}$  NMR (75 MHz,  $\text{CDCl}_3$ ):  $\delta = 208.6$  ( $\text{C}=\text{C}=\text{CH}_2$ ), 157.3, 129.6 (Ar, 2CH), 121.5 (Ar, CH), 115.5 (Ar, 2CH), 111.9, 105.1 (CH, H1), 95.2, 82.2 (CH, H2), 79.8 (CH, H3), 78.9 (CH, H4), 78.8 (OCH), 74.4 ( $\text{C}=\text{CH}_2$ ), 56.0 (OMe), 26.8 (Me), 26.3 (Me), 12.6 (Me); IR ( $\text{CHCl}_3$ ):  $\nu = 2990, 1941$   $\text{cm}^{-1}$ ; HRMS (ES): calcd for  $\text{C}_{19}\text{H}_{24}\text{O}_5$   $[M]^+$ : 332.1624; found: 332.1624.

**Methoxy Allene (–)-4b.** From 174 mg (0.52 mmol) of the corresponding  $\alpha$ -allenic alcohol, and after chromatography of the residue using hexanes/ethyl acetate (8:1) as eluent gave the methoxy allene (–)-**4b** (135 mg, 75%) as a colorless oil;  $[\alpha]_D = -16.9$  ( $c = 0.4$  in  $\text{CHCl}_3$ );  $^1\text{H}$  NMR (300 MHz,  $\text{CDCl}_3$ ):  $\delta = 1.01$  (t, 3H,  $J = 7.3$  Hz, Me), 1.23 (s, 3H, Me), 1.45 (s, 3H, Me), 1.98 (m, 2H,  $\text{CH}_2$ ), 3.08 (s, 3H, OMe), 4.04 (d, 1H,  $J = 9.6$  Hz, OCH), 4.26 (dd, 1H,  $J = 9.5, 2.9$  Hz, H4), 4.54 (d, 1H,  $J = 3.8$  Hz, H2), 4.71 (d, 1H,  $J = 3.1$  Hz, H3), 4.81 (m, 2H,  $=\text{CH}_2$ ), 5.88 (d, 1H,  $J = 3.8$  Hz, H1), 6.93 (t, 1H,  $J = 7.7$  Hz, Ar), 6.94 (d, 2H,  $J = 7.7$  Hz, Ar), 7.24 (t, 2H,  $J = 7.1$  Hz, Ar);  $^{13}\text{C}$  NMR (75 MHz,  $\text{CDCl}_3$ ):  $\delta = 207.9$  ( $\text{C}=\text{C}=\text{CH}_2$ ), 157.3, 129.6 (Ar, 2CH), 121.5 (Ar, CH), 115.5 (Ar, 2CH), 111.9, 105.1 (CH, H1), 102.4, 82.1 (CH, H2), 79.8 (CH, H3), 79.2 (CH, H4), 78.9 (OCH), 76.9 ( $\text{C}=\text{CH}_2$ ), 56.1 (OMe), 26.8 (Me), 26.4 (Me), 18.8 ( $\text{CH}_2$ ), 12.0 (Me); IR ( $\text{CHCl}_3$ ):  $\nu = 2996, 1945$   $\text{cm}^{-1}$ ; HRMS (ES): calcd for  $\text{C}_{20}\text{H}_{26}\text{O}_5$   $[M]^+$ : 346.1780; found: 346.1792.

**Methoxy Allene (–)-4c.** From 267 mg (0.63 mmol) of the corresponding  $\alpha$ -allenic alcohol, and after chromatography of the residue using hexanes/ethyl acetate (10:1) as eluent gave the methoxy allene (–)-**4c** (221 mg, 80%) as a colorless oil;  $[\alpha]_D = -27.9$  ( $c = 0.5$  in  $\text{CHCl}_3$ );  $^1\text{H}$  NMR (300 MHz,  $\text{CDCl}_3$ ):  $\delta = 1.21$  (s, 3H, Me), 1.36 (s, 3H, Me), 3.13 (s, 3H, OMe), 4.04 (d, 1H,  $J = 11.9$  Hz, OCHH), 4.13 (d, 1H,  $J = 9.5$  Hz, OCH), 4.18 (dt, 1H,  $J = 11.9, 2.3$  Hz, OCHH), 4.39 (dd, 1H,  $J = 9.5, 3.0$  Hz, H4), 4.47 (d, 1H,  $J = 11.9$  Hz, OCHHAr), 4.52 (d, 1H,  $J = 4.0$  Hz, H2), 4.55 (d, 1H,  $J = 12.0$  Hz, OCHHAr), 4.72 (d, 1H,  $J = 3.0$  Hz, H3), 4.90 (q, 2H,  $J = 11.1$  Hz,  $=\text{CH}_2$ ), 5.87 (d, 1H,  $J = 3.8$  Hz, H1), 6.92 (t, 1H,  $J = 7.5$  Hz, Ar), 6.93 (d, 2H,  $J = 8.5$  Hz, Ar), 7.18 (m, 2H, Ar), 7.24 (m, 3H, Ar), 7.29 (t, 2H,  $J = 7.0$  Hz, Ar);  $^{13}\text{C}$  NMR (75 MHz,  $\text{CDCl}_3$ ):  $\delta = 208.9$  ( $\text{C}=\text{C}=\text{CH}_2$ ), 157.2, 138.3, 129.6 (Ar, 2CH), 128.2 (Ar, 2CH), 127.9 (Ar, 2CH), 127.4 (Ar, CH), 121.5 (Ar, CH), 115.5 (Ar, 2CH), 112.0, 105.2 (CH, H1), 98.6, 82.1 (CH, H2), 80.5 (CH, H3), 79.8 (CH, H4), 77.3 (OCH), 77.1 ( $\text{C}=\text{CH}_2$ ), 71.7 ( $\text{OCH}_2\text{Ar}$ ), 67.7 ( $\text{OCH}_2$ ), 56.7 (OMe), 26.7 (Me), 26.4 (Me); IR ( $\text{CHCl}_3$ ):  $\nu = 3000, 1947$   $\text{cm}^{-1}$ ; HRMS (ES): calcd for  $\text{C}_{26}\text{H}_{30}\text{O}_6$   $[M]^+$ : 438.2042; found: 438.2051.

**Methoxy Allene (–)-4d.** From 283 mg (0.71 mmol) of the corresponding  $\alpha$ -allenic alcohol, and after chromatography of the residue using hexanes/ethyl acetate (10:1) as eluent gave the methoxy allene (–)-**4d** (225 mg, 77%) as a colorless oil;  $[\alpha]_D = -22.3$  ( $c = 0.5$  in  $\text{CHCl}_3$ );  $^1\text{H}$  NMR (300 MHz,  $\text{CDCl}_3$ ):  $\delta = 1.32$  (s, 3H, Me), 1.52 (s, 3H, Me), 1.73 (t, 3H,  $J = 3.0$  Hz, Me), 3.14 (s, 3H, OMe), 4.02 (d, 1H,  $J = 9.5$  Hz, OCH), 4.30 (dd, 1H,  $J = 9.5, 3.1$  Hz, H4), 4.58 (d, 1H,  $J = 3.8$  Hz, H2), 4.73 (d, 1H,  $J = 2.9$  Hz, H3), 4.77 (m, 2H,  $=\text{CH}_2$ ), 5.96 (d, 1H,  $J = 3.8$  Hz, H1), 6.90 (d, 2H,  $J = 9.1$  Hz, Ar), 7.41 (d, 2H,  $J = 9.1$  Hz, Ar);  $^{13}\text{C}$  NMR (75 MHz,  $\text{CDCl}_3$ ):  $\delta = 208.7$  ( $\text{C}=\text{C}=\text{CH}_2$ ), 156.5, 132.5 (Ar, 2CH), 117.3 (Ar, 2CH), 113.9, 112.1, 105.1 (CH, H1), 95.1, 82.2 (CH, H2), 80.3 (CH, H3), 78.8 (CH, H4), 78.8 (OCH), 74.6 ( $\text{C}=\text{CH}_2$ ), 56.0 (OMe), 26.8 (Me), 26.4 (Me), 12.6 (Me); IR ( $\text{CHCl}_3$ ):  $\nu = 2995, 1945$   $\text{cm}^{-1}$ ; HRMS (ES): calcd for  $\text{C}_{19}\text{H}_{23}\text{BrO}_5$   $[M]^+$ : 410.0729; found: 410.0738.



**Methoxy Allene (–)-4e.** From 85 mg (0.17 mmol) of the corresponding  $\alpha$ -allenic alcohol, and after chromatography of the residue using hexanes/ethyl acetate (8:1) as eluent gave the methoxy allene (–)-**4e** (85 mg, 99%) as a colorless oil;  $[\alpha]_D = -12.3$  ( $c = 0.1$  in  $\text{CHCl}_3$ );  $^1\text{H NMR}$  (300 MHz,  $\text{CDCl}_3$ ):  $\delta = 1.21$  (s, 3H, Me), 1.36 (s, 3H, Me), 3.11 (s, 3H, OMe), 4.02 (m, 1H, OCHH), 4.06 (d, 1H,  $J = 9.6$  Hz, OCH), 4.17 (dt, 1H,  $J = 11.8, 2.5$  Hz, OCHH), 4.39 (dd, 1H,  $J = 9.5, 3.0$  Hz, H4), 4.45 (d, 1H,  $J = 11.8$  Hz, OCHHAr), 4.47 (d, 1H,  $J = 3.5$  Hz, H2), 4.54 (d, 1H,  $J = 11.9$  Hz, OCHHAr), 4.65 (d, 1H,  $J = 3.0$  Hz, H3), 4.89 (q, 2H,  $J = 11.2$  Hz,  $=\text{CH}_2$ ), 5.87 (d, 1H,  $J = 3.8$  Hz, H1), 6.82 (d, 2H,  $J = 9.1$  Hz, Ar), 7.21 (m, 2H, Ar), 7.27 (m, 3H, Ar), 7.33 (d, 2H,  $J = 9.1$  Hz, Ar);  $^{13}\text{C NMR}$  (75 MHz,  $\text{CDCl}_3$ ):  $\delta = 209.3$  ( $\text{C}=\text{C}=\text{CH}_2$ ), 156.8, 138.7, 132.9 (Ar, 2CH), 128.7 (Ar, 2CH), 128.3 (Ar, 2CH), 127.9 (Ar, CH), 117.6 (Ar, 2CH), 114.2, 112.5, 105.6 (CH, H1), 98.8, 82.5 (CH, H2), 80.9 (CH, H3), 80.7 (CH, H4), 77.3 (OCH), 77.2 ( $\text{C}=\text{CH}_2$ ), 72.1 ( $\text{OCH}_2$ ), 68.1 ( $\text{OCH}_2\text{Ar}$ ), 57.0 (OMe), 27.1 (Me), 26.8 (Me); IR ( $\text{CHCl}_3$ ):  $\nu = 2998, 1947$   $\text{cm}^{-1}$ ; HRMS (ES): calcd for  $\text{C}_{26}\text{H}_{29}\text{BrO}_6$   $[M]^+$ : 516.1184; found: 516.1169.

### General Procedure for the Gold-Catalyzed Hydroarylation of Allenyl-Tethered Arenes

**1. Preparation of Nine-Membered Fused  $\beta$ -Lactams 3.**  $[(\text{Ph}_3\text{P})\text{AuNTf}_2]$  (0.05 mmol) was added to a stirred solution of the corresponding allene **1** (1.0 mmol) in 1,2-dichloroethane (13.0 mL) under argon. The resulting mixture was stirred at room temperature (**1a**) or at 110 °C under  $\mu$ wave irradiation (**1b–h**), until disappearance of the starting material (TLC). After filtration through a pad of Celite, the mixture was extracted with ethyl acetate (3 x 5 mL), and the combined extracts were washed twice with brine. The organic layer was dried ( $\text{MgSO}_4$ ) and concentrated under reduced pressure. Chromatography of the residue eluting with ethyl acetate/hexanes mixtures gave analytically pure adducts **3**.

**Preparation of Diene (–)-2a and Benzocycle (+)-3a.** From 80 mg (0.23 mmol) of allene (+)-**1a**, and after chromatography of the residue using hexanes/ethyl acetate (2:1) as eluent, 27 mg

(34%) of the less polar compound (-)-**2a** and 11 mg (13%) of the more polar compound (+)-**3a** were obtained.

**Diene (-)-2a.** Colorless oil;  $[\alpha]_D = -3.5$  ( $c = 0.2$  in  $\text{CHCl}_3$ );  $^1\text{H NMR}$  (300 MHz,  $\text{CDCl}_3$ ):  $\delta = 0.87$  (t, 6H,  $J = 6.4$  Hz, 2Me), 1.74 (m, 1H, CH isobut), 1.84 (d, 3H,  $J = 1.2$  Hz, Me), 2.03 (s, 3H, COMe), 2.76 (dd, 1H,  $J = 13.9, 6.7$  Hz, NCHH), 3.07 (dd, 1H,  $J = 14.0, 7.6$  Hz, NCHH), 4.64 (dd, 1H,  $J = 9.6, 4.4$  Hz, H4), 4.81 (d, 1H,  $J = 2.0$  Hz, =CHH), 5.03 (d, 1H,  $J = 2.2$  Hz, =CHH), 5.26 (d, 1H,  $J = 4.5$  Hz, H3), 5.67 (d, 1H,  $J = 9.6$  Hz, =CH), 6.85 (d, 2H,  $J = 7.7$  Hz, Ar), 6.92 (t, 1H,  $J = 7.3$  Hz, Ar), 7.18 (t, 2H,  $J = 7.4$  Hz, Ar);  $^{13}\text{C NMR}$  (75 MHz,  $\text{CDCl}_3$ ):  $\delta = 168.6$  (COMe), 165.8 (CO), 157.3, 153.2, 135.3, 129.5 (Ar, 2CH), 122.2 (Ar, CH), 121.0 (=CH), 115.5 (Ar, 2CH), 104.1 (=CH<sub>2</sub>), 81.7 (CH, H3), 56.5 (CH, H4), 48.4 (NCH<sub>2</sub>), 27.5 (CH isobut), 20.3 (2Me), 13.7 (Me); IR ( $\text{CHCl}_3$ ):  $\nu = 1758 \text{ cm}^{-1}$ ; HRMS (ES): calcd for  $\text{C}_{20}\text{H}_{25}\text{NO}_4$   $[M]^+$ : 343.1784; found: 343.1797.

**Benzocycle (+)-3a.** Colorless oil;  $[\alpha]_D = +16.8$  ( $c = 0.4$  in  $\text{CHCl}_3$ );  $^1\text{H NMR}$  (300 MHz,  $\text{CDCl}_3$ ):  $\delta = 0.95$  (d, 3H,  $J = 6.7$  Hz, Me), 0.99 (d, 3H,  $J = 6.7$  Hz, Me), 1.80 (t, 3H,  $J = 2.6$  Hz, Me), 2.03 (m, 1H, CH isobut), 2.11 (s, 3H, COMe), 2.67 (m, 2H, CH<sub>2</sub>Ar), 2.95 (dd, 1H,  $J = 13.7, 6.0$  Hz, NCHH), 3.32 (dd, 1H,  $J = 13.8, 8.6$  Hz, NCHH), 4.34 (dd, 1H,  $J = 7.2, 5.1$  Hz, H4), 5.26 (m, 1H, OCH), 5.29 (d, 1H,  $J = 5.1$  Hz, H3), 7.03 (t, 1H,  $J = 7.3$  Hz, =CH), 7.10 (d, 2H,  $J = 7.9$  Hz, Ar), 7.30 (t, 2H,  $J = 7.6$  Hz, Ar);  $^{13}\text{C NMR}$  (75 MHz,  $\text{CDCl}_3$ ):  $\delta = 169.7$  (COMe), 166.4 (CO), 157.6, 129.6 (Ar, 2CH), 122.5 (=CH), 122.0 (=C), 115.8 (Ar, 2CH), 115.7, 79.9 (CH, H3), 71.1 (OCH), 57.9 (CH, H4), 49.6 (CH<sub>2</sub> isobut), 27.0 (CH isobut), 22.0 (CH<sub>2</sub>Ar), 21.1 (Me), 20.4 (Me), 20.1 (Me), 3.5 (Me); IR ( $\text{CHCl}_3$ ):  $\nu = 1757 \text{ cm}^{-1}$ ; HRMS (ES): calcd for  $\text{C}_{20}\text{H}_{25}\text{NO}_4$   $[M]^+$ : 343.1784; found: 343.1797.

**Benzocycle (+)-3b.** From 68 mg (0.215 mmol) of allene (+)-**1b**, and after chromatography of the residue using hexanes/ethyl acetate (8:1) as eluent gave tricycle (+)-**3b** (50 mg, 72%) as a colorless oil;  $[\alpha]_D = +25.9$  ( $c = 0.8$  in  $\text{CHCl}_3$ );  $^1\text{H NMR}$  (300 MHz,  $\text{CDCl}_3$ ):  $\delta = 0.93$  (d, 3H,  $J =$

6.7 Hz, Me), 0.98 (d, 3H,  $J = 6.7$  Hz, Me), 1.81 (t, 3H,  $J = 2.6$  Hz, Me), 2.08 (m, 1H, CH isobut), 2.58 (m, 2H, CH<sub>2</sub>Ar), 3.10 (dd, 1H,  $J = 13.6, 6.3$  Hz, NCHH), 3.28 (dd, 1H,  $J = 13.6, 8.3$  Hz, NCHH), 3.47 (s, 3H, OMe), 3.67 (dt, 1H,  $J = 8.4, 4.2$  Hz, OCH), 4.12 (dd, 1H,  $J = 8.5, 5.1$  Hz, H4), 5.23 (d, 1H,  $J = 5.1$  Hz, H3), 7.03 (t, 1H,  $J = 7.3$  Hz, =CH), 7.13 (d, 2H,  $J = 7.7$  Hz, Ar), 7.31 (m, 2H, Ar); <sup>13</sup>C NMR (75 MHz, CDCl<sub>3</sub>):  $\delta = 167.2$  (CO), 158.1, 130.0 (Ar, 2CH), 122.8 (=CH), 121.0 (=C), 116.3 (Ar, 2CH), 115.7, 80.1 (CH, H3), 79.7 (OCH), 59.6 (CH, H4), 57.4 (OMe), 50.1 (NCH<sub>2</sub>), 27.3 (CH isobut), 20.8 (2Me), 20.6 (CH<sub>2</sub>Ar), 4.1 (Me); IR (CHCl<sub>3</sub>):  $\nu = 1756$  cm<sup>-1</sup>; HRMS (ES): calcd for C<sub>19</sub>H<sub>25</sub>NO<sub>3</sub> [ $M$ ]<sup>+</sup>: 315.1834; found: 315.1844.

**Benzocycle (+)-3c.** From 50 mg (0.132 mmol) of allene (+)-**1c**, and after chromatography of the residue using hexanes/ethyl acetate (8:1) as eluent gave tricycle (+)-**3c** (30 mg, 60%) as a colorless oil;  $[\alpha]_D = +24.1$  ( $c = 0.4$  in CHCl<sub>3</sub>); <sup>1</sup>H NMR (700 MHz, CDCl<sub>3</sub>):  $\delta = 0.92$  (d, 3H,  $J = 6.6$  Hz, Me), 0.97 (d, 3H,  $J = 6.6$  Hz, Me), 2.08 (m, 1H, CH isobut), 2.78 (dd, 1H,  $J = 17.5, 4.5$  Hz, CHHAr), 2.94 (dd, 1H,  $J = 17.5, 4.2$  Hz, CHHAr), 3.11 (dd, 1H,  $J = 13.6, 6.2$  Hz, NCHH), 3.32 (dd, 1H,  $J = 13.2, 8.3$  Hz, NCHH), 3.54 (s, 3H, OMe), 3.81 (dt, 1H,  $J = 8.5, 4.4$  Hz, OCH), 4.17 (dd, 1H,  $J = 8.3, 5.1$  Hz, H4), 5.27 (d, 1H,  $J = 5.0$  Hz, H3), 7.04 (t, 1H,  $J = 7.3$  Hz, =CH), 7.16 (d, 2H,  $J = 7.6$  Hz, Ar), 7.31 (m, 5H, Ar), 7.41 (m, 2H, Ar); <sup>13</sup>C NMR (175 MHz, CDCl<sub>3</sub>):  $\delta = 166.7$  (CO), 157.7, 131.7 (Ar, 2CH), 129.7 (Ar, 3CH), 128.7, 128.3 (Ar, 2CH), 124.0 (=C), 122.4 (=CH), 115.9 (Ar, 2CH), 115.7, 79.7 (CH, H3), 79.3 (OCH), 59.4 (CH, H4), 57.4 (OMe), 49.7 (NCH<sub>2</sub>), 27.0 (CH isobut), 21.4 (CH<sub>2</sub>Ar), 20.5 (Me), 20.2 (Me); IR (CHCl<sub>3</sub>):  $\nu = 1757$  cm<sup>-1</sup>; HRMS (ES): calcd for C<sub>24</sub>H<sub>27</sub>NO<sub>3</sub> [ $M$ ]<sup>+</sup>: 377.1991; found: 377.2001.

**Benzocycle (+)-3d.** From 50 mg (0.16 mmol) of allene (+)-**1d**, and after chromatography of the residue using hexanes/ethyl acetate (7:1) as eluent gave tricycle (+)-**3d** (30 mg, 58%) as a colorless oil;  $[\alpha]_D = +28.0$  ( $c = 0.4$  in CHCl<sub>3</sub>); <sup>1</sup>H NMR (300 MHz, CDCl<sub>3</sub>):  $\delta = 1.75$  (d, 3H,  $J = 2.5$  Hz, Me), 2.42 (d, 1H,  $J = 17.4$  Hz, CHHAr), 2.61 (d, 1H,  $J = 17.4$  Hz, CHHAr), 3.28 (s, 3H,

OMe), 3.65 (m, 1H, OCH), 4.04 (dd, 1H,  $J = 8, 6, 5.1$  Hz, H4), 4.46 (d, 1H,  $J = 14.8$  Hz, NCHH), 4.64 (d, 1H,  $J = 14.8$  Hz, NCHH), 5.20 (d, 1H,  $J = 5.1$  Hz, H3), 7.03 (t, 1H,  $J = 7.3$  Hz, =CH), 7.13 (d, 2H,  $J = 8.6$  Hz, Ar), 7.31 (m, 4H, Ar), 7.53 (m, 3H, Ar);  $^{13}\text{C}$  NMR (75 MHz,  $\text{CDCl}_3$ ):  $\delta = 166.3$  (CO), 157.4, 130.0 (Ar, 2CH), 129.02 (Ar, 2CH), 128.8 (Ar, 2CH), 127.9 (Ar, CH), 122.4 (=CH), 121.8 (=C), 116.0 (Ar, 2CH), 115.6, 79.5 (CH, H3), 77.6 (OCH), 59.3 (CH, H4), 57.3 (OMe), 46.3 (NCH<sub>2</sub>), 20.6 (CH<sub>2</sub>Ar), 14.5 (Me); IR ( $\text{CHCl}_3$ ):  $\nu = 1758\text{ cm}^{-1}$ ; HRMS (ES): calcd for  $\text{C}_{22}\text{H}_{23}\text{NO}_3$   $[M]^+$ : 349.1678; found: 349.1671.

**Benzocycle (+)-3e.** From 44 mg (0.108 mmol) of allene (+)-**1e**, and after chromatography of the residue using hexanes/ethyl acetate (7:1) as eluent gave tricycle (+)-**3e** (30 mg, 69%) as a colorless oil;  $[\alpha]_{\text{D}} = +16.6$  ( $c = 0.4$  in  $\text{CHCl}_3$ );  $^1\text{H}$  NMR (300 MHz,  $\text{CDCl}_3$ ):  $\delta = 2.67$  (dd, 1H,  $J = 17.5, 4.5$  Hz, CHHAr), 2.88 (dd, 1H,  $J = 17.5, 4.0$  Hz, CHHAr), 3.37 (s, 3H, OMe), 3.80 (dt, 1H,  $J = 8.6, 4.2$  Hz, OCH), 4.09 (dd, 1H,  $J = 8.6, 5.0$  Hz, H4), 4.45 (d, 1H,  $J = 14.6$  Hz, NCHH), 4.71 (d, 1H,  $J = 14.8$  Hz, NCHH), 5.23 (d, 1H,  $J = 5.1$  Hz, H3), 7.04 (t, 1H,  $J = 7.3$  Hz, =CH), 7.15 (d, 2H,  $J = 7.7$  Hz, Ar), 7.29 (m, 6H, Ar), 7.35 (m, 6H, Ar);  $^{13}\text{C}$  NMR (75 MHz,  $\text{CDCl}_3$ ):  $\delta = 166.3$  (CO), 157.6, 136.1, 131.6 (Ar, 2CH), 129.6 (Ar, 2CH), 128.7 (Ar, 4CH), 128.5 (Ar, 2CH), 128.2 (Ar, 2CH), 127.9, 127.6, 123.4 (=C), 122.5 (=CH), 115.9 (Ar, 2CH), 80.0 (CH, H3), 79.1 (OCH), 58.7 (CH, H4), 57.1 (OMe), 46.0 (NCH<sub>2</sub>), 21.3 (CH<sub>2</sub>Ar); IR ( $\text{CHCl}_3$ ):  $\nu = 1758\text{ cm}^{-1}$ ; HRMS (ES): calcd for  $\text{C}_{27}\text{H}_{25}\text{NO}_3$   $[M]^+$ : 411.1834; found: 411.1835.

**Benzocycle (+)-3f.** From 46 mg (0.16 mmol) of allene (+)-**1f**, and after chromatography of the residue using hexanes/ethyl acetate (7:1) as eluent gave tricycle (+)-**3f** (32 mg, 65%) as a colorless oil;  $[\alpha]_{\text{D}} = +16.4$  ( $c = 0.2$  in  $\text{CHCl}_3$ );  $^1\text{H}$  NMR (700 MHz,  $\text{CDCl}_3$ ):  $\delta = 1.30$  (d, 3H,  $J = 6.7$  Hz, Me), 1.39 (d, 3H,  $J = 6.9$  Hz, Me), 1.80 (t, 3H,  $J = 2.6$  Hz, Me), 2.52 (d, 1H,  $J = 16.9$  Hz, CHHAr), 2.71 (d, 1H,  $J = 16.4$  Hz, CHHAr), 3.48 (s, 3H, OMe), 3.62 (dt, 1H,  $J = 8.7, 4.0$  Hz, OCH), 3.88 (sept, 1H,  $J = 6.7$  Hz, NCH), 4.14 (dd, 1H,  $J = 8, 8, 5.1$  Hz, H4), 5.15 (d, 1H,  $J = 5.1$

Hz, H3), 7.02 (t, 1H,  $J = 7.4$  Hz, =CH), 7.13 (d, 2H,  $J = 8.0$  Hz, Ar), 7.30 (t, 2H,  $J = 7.4$  Hz, Ar);  $^{13}\text{C}$  NMR (175 MHz,  $\text{CDCl}_3$ ):  $\delta = 165.9$  (CO), 157.7, 129.5 (Ar, 2CH), 122.3 (=CH), 120.0 (=C), 116.0 (Ar, 2CH), 115.9, 79.3 (CH, H3), 79.1 (OCH), 58.6 (CH, H4), 56.9 (OMe), 46.2 (NCH), 21.2 (Me), 20.1 (Me), 19.8 ( $\text{CH}_2\text{Ar}$ ), 3.7 (Me); IR ( $\text{CHCl}_3$ ):  $\nu = 1751\text{ cm}^{-1}$ ; HRMS (ES): calcd for  $\text{C}_{18}\text{H}_{23}\text{NO}_3$  [ $M$ ] $^+$ : 301.1678; found: 301.1674.

**Benzocycle (+)-3g.** From 60 mg (0.165 mmol) of allene (+)-**1g**, and after chromatography of the residue using hexanes/ethyl acetate (7:1) as eluent gave tricycle (+)-**3g** (36 mg, 59%) as a colorless oil;  $[\alpha]_{\text{D}} = +17.9$  ( $c = 0.5$  in  $\text{CHCl}_3$ );  $^1\text{H}$  NMR (700 MHz,  $\text{CDCl}_3$ ):  $\delta = 1.31$  (d, 3H,  $J = 6.7$  Hz, Me), 1.39 (d, 3H,  $J = 6.9$  Hz, Me), 2.77 (dd, 1H,  $J = 17.7, 4.1$  Hz,  $\text{CHHAr}$ ), 2.98 (dd, 1H,  $J = 17.7, 4.0$  Hz,  $\text{CHHAr}$ ), 3.55 (s, 3H, OMe), 3.76 (dt, 1H,  $J = 8.7, 4.1$  Hz, OCH), 3.90 (sept, 1H,  $J = 6.7$  Hz, NCH), 4.19 (dd, 1H,  $J = 8.5, 5.2$  Hz, H4), 5.19 (d, 1H,  $J = 5.2$  Hz, H3), 7.03 (t, 1H,  $J = 7.2$  Hz, =CH), 7.15 (d, 2H,  $J = 8.0$  Hz, Ar), 7.30 (m, 5H, Ar), 7.41 (m, 2H, Ar);  $^{13}\text{C}$  NMR (175 MHz,  $\text{CDCl}_3$ ):  $\delta = 165.9$  (CO), 157.7, 131.6 (Ar, 2CH), 129. (Ar, 2CH), 128.2 (Ar, 2CH), 127.9 (Ar, CH), 127.8, 123.4 (=C), 122.3 (=CH), 115.9 (Ar, 2CH), 115.8, 79.2 (CH, H3), 79.1 (OCH), 58.7 (CH, H4), 57.1 (OMe), 46.2 (NCH), 21.3 (Me), 20.9 ( $\text{CH}_2\text{Ar}$ ), 20.0 (Me); IR ( $\text{CHCl}_3$ ):  $\nu = 1752\text{ cm}^{-1}$ ; HRMS (ES): calcd for  $\text{C}_{23}\text{H}_{25}\text{NO}_3$  [ $M$ ] $^+$ : 363.1834; found: 363.1840.

**Benzocycle (+)-3h.** From 30 mg (0.08 mmol) of allene (+)-**1h**, and after chromatography of the residue using hexanes/ethyl acetate (4:1) as eluent gave tricycle (+)-**3h** (19 mg, 63%) as a colorless oil;  $[\alpha]_{\text{D}} = +14.8$  ( $c = 0.4$  in  $\text{CHCl}_3$ );  $^1\text{H}$  NMR (700 MHz,  $\text{CDCl}_3$ ):  $\delta = 1.76$  (s, 3H, Me), 2.73 (dd, 1H,  $J = 17.7, 4.7$  Hz,  $\text{CHHAr}$ ), 2.91 (dd, 1H,  $J = 17.6, 4.5$  Hz,  $\text{CHHAr}$ ), 3.52 (s, 3H, OMe), 3.80 (m, 1H, OCH), 3.83 (d, 1H,  $J = 14.9$  Hz,  $\text{NCHH}$ ), 4.09 (d, 1H,  $J = 15.0$  Hz,  $\text{NCHH}$ ), 4.16 (dd, 1H,  $J = 7.9, 5.0$  Hz, H4), 4.94 (d, 2H,  $J = 13.9$  Hz, = $\text{CH}_2$ ), 5.29 (d, 1H,  $J = 5.1$  Hz, H3), 7.04 (t, 1H,  $J = 7.3$  Hz, =CH), 7.15 (d, 2H,  $J = 7.7$  Hz, Ar), 7.30 (m, 5H, Ar), 7.40 (m, 2H, Ar);  $^{13}\text{C}$  NMR (175 MHz,  $\text{CDCl}_3$ ):  $\delta = 166.6$  (CO), 157.8, 157.7, 139.4, 131.6 (Ar, 2CH), 129.6. (Ar, 2CH),

128.2 (Ar, 2CH), 127.9 (Ar, CH), 123.4 (=C), 122.4 (=CH), 118.1, 115.9 (Ar, 2CH), 113.2 (C=CH<sub>2</sub>), 79.9 (CH, H3), 79.0 (OCH), 59.1 (CH, H4), 57.4 (OMe), 47.8 (NCH<sub>2</sub>), 21.5 (CH<sub>2</sub>Ar), 20.6 (Me); IR (CHCl<sub>3</sub>):  $\nu = 1758\text{ cm}^{-1}$ ; HRMS (ES): calcd for C<sub>24</sub>H<sub>25</sub>NO<sub>3</sub> [M]<sup>+</sup>: 375.1834; found: 375.1836.

### General Procedure for the Gold-Catalyzed Hydroalkylation of Allenyl-Tethered Arenes

**4. Preparation of Cyclopenta[*b*]furans 5.** [(Ph<sub>3</sub>P)AuNTf<sub>2</sub>] (0.05 mmol) was added to a stirred solution of the corresponding allene **4** (1.0 mmol) in 1,2-dichloroethane (13.0 mL) under argon. The resulting mixture was stirred at room temperature until disappearance of the starting material (TLC). After filtration through a pad of Celite, the mixture was extracted with ethyl acetate (3 x 5 mL), and the combined extracts were washed twice with brine. The organic layer was dried (MgSO<sub>4</sub>) and concentrated under reduced pressure. Chromatography of the residue eluting with ethyl acetate/hexanes mixtures gave analytically pure adducts **5**.

**Fused Cyclopentene (+)-5a.** From 156 mg (0.47 mmol) of allene (–)-**4a**, and after chromatography of the residue using hexanes/ethyl acetate (20:1) as eluent gave tricycle (+)-**5a** (73 mg, 46%) as a colorless oil;  $[\alpha]_D = +55.9$  ( $c = 0.9$  in CHCl<sub>3</sub>); <sup>1</sup>H NMR (300 MHz, CDCl<sub>3</sub>):  $\delta = 1.43$  (s, 3H, Me), 1.53 (s, 3H, Me), 1.88 (s, 3H, Me), 2.19 (s, 3H, Me), 3.35 (s, 3H, OMe), 4.53 (dd, 1H,  $J = 6.7, 2.3$  Hz, H4), 5.00 (d, 1H,  $J = 2.5$  Hz, H2), 5.09 (d, 1H,  $J = 6.9$  Hz, OCH), 6.15 (s, 1H, H1), 6.96 (t, 1H,  $J = 7.3$  Hz, Ar), 6.97 (d, 2H,  $J = 7.8$  Hz, Ar), 7.24 (m, 2H, Ar); <sup>13</sup>C NMR (75 MHz, CDCl<sub>3</sub>):  $\delta = 157.9, 147.6, 147.2, 129.3$  (Ar, 2CH), 121.4 (Ar, CH), 116.3 (Ar, 2CH), 114.8, 112.7 (CH, H1), 112.0, 104.3 (CH, H2), 83.7 (CH, H4), 74.4 (OCH), 55.2 (OMe), 27.6 (Me), 27.2 (Me), 11.4 (Me), 9.8 (Me); IR (CHCl<sub>3</sub>):  $\nu = 1072\text{ cm}^{-1}$ ; HRMS (ES): calcd for C<sub>19</sub>H<sub>24</sub>O<sub>5</sub> [M]<sup>+</sup>: 315.1624; found: 332.1614.

**Fused Cyclopentene (+)-5b.** From 126 mg (0.36 mmol) of allene (–)-**4b**, and after chromatography of the residue using hexanes/ethyl acetate (20:1) as eluent gave tricycle (+)-**5b** (46

mg, 34%) as a colorless oil;  $[\alpha]_D = +33.3$  ( $c = 0.2$  in  $\text{CHCl}_3$ );  $^1\text{H NMR}$  (700 MHz,  $\text{CDCl}_3$ ):  $\delta = 1.07$  (t, 3H,  $J = 7.6$  Hz, Me), 1.41 (s, 3H, Me), 1.53 (s, 3H, Me), 2.19 (s, 1H, Me), 2.29 (q, 2H,  $J = 9.6$  Hz,  $\text{CH}_2$ ), 3.34 (s, 3H, OMe), 4.53 (dd, 1H,  $J = 7.0, 2.5$  Hz, H4), 5.00 (d, 1H,  $J = 2.5$  Hz, H2), 5.09 (d, 1H,  $J = 6.9$  Hz, OCH), 6.20 (s, 1H, H1), 6.94 (t, 1H,  $J = 7.3$  Hz, Ar), 6.98 (d, 2H,  $J = 7.7$  Hz, Ar), 7.24 (t, 2H,  $J = 7.4$  Hz, Ar);  $^{13}\text{C NMR}$  (175 MHz,  $\text{CDCl}_3$ ):  $\delta = 157.8, 146.9, 146.7, 129.1$  (Ar, 2CH), 121.3 (Ar, CH), 121.2, 116.2 (Ar, 2CH), 111.8, 111.0 (CH, H1), 104.2 (CH, H2), 83.4 (CH, H4), 74.4 (OCH), 55.1 (OMe), 27.4 (Me), 27.0 (Me), 17.8 ( $\text{CH}_2$ ), 14.6 (Me), 11.4 (Me); IR ( $\text{CHCl}_3$ ):  $\nu = 1074 \text{ cm}^{-1}$ ; HRMS (ES): calcd for  $\text{C}_{20}\text{H}_{26}\text{O}_5$   $[M]^+$ : 346.1780; found: 346.1777.

**Fused Cyclopentene (+)-5c.** From 150 mg (0.34 mmol) of allene (–)-4c, and after chromatography of the residue using hexanes/ethyl acetate (20:1) as eluent gave tricycle (+)-5c (73 mg, 48%) as a colorless oil;  $[\alpha]_D = +34.9$  ( $c = 0.5$  in  $\text{CHCl}_3$ );  $^1\text{H NMR}$  (300 MHz,  $\text{CDCl}_3$ ):  $\delta = 1.34$  (s, 3H, Me), 1.45 (s, 3H, Me), 2.16 (s, 3H, Me), 3.26 (s, 3H, OMe), 4.22 (d, 2H,  $J = 11.9$  Hz,  $\text{OCH}_2$ ), 4.35 (m, 2H,  $\text{OCH}_2\text{Ar}$ ), 4.47 (dd, 1H,  $J = 6.7, 2.5$  Hz, H4), 4.94 (d, 1H,  $J = 2.5$  Hz, H2), 5.06 (d, 1H,  $J = 6.7$  Hz, OCH), 6.27 (s, 1H, H1), 6.87 (t, 1H,  $J = 7.2$  Hz, Ar), 6.89 (d, 2H,  $J = 7.7$  Hz, Ar), 7.16 (m, 2H, Ar), 7.22 (m, 3H, Ar), 7.27 (m, 2H, Ar);  $^{13}\text{C NMR}$  (75 MHz,  $\text{CDCl}_3$ ):  $\delta = 157.8, 150.3, 147.9, 138.0, 129.3$  (Ar, 2CH), 128.3 (Ar, 2CH), 127.8 (Ar, 2CH), 127.6 (Ar, CH), 121.6 (Ar, CH), 116.3, 116.4 (Ar, 2CH), 112.0, 111.6 (CH, H1), 104.2 (CH, H2), 83.5 (OCH), 79.4 (CH, H4), 71.5 ( $\text{OCH}_2\text{Ar}$ ), 63.2 ( $\text{OCH}_2$ ), 55.2 (OMe), 27.6 (Me), 27.2 (Me), 11.9 (Me); IR ( $\text{CHCl}_3$ ):  $\nu = 1071 \text{ cm}^{-1}$ ; HRMS (ES): calcd for  $\text{C}_{26}\text{H}_{30}\text{O}_6$   $[M]^+$ : 438.2042; found: 438.2034.

**Fused Cyclopentene (+)-5d.** From 118 mg (0.29 mmol) of allene (–)-4d, and after chromatography of the residue using hexanes/ethyl acetate (8:1) as eluent gave tricycle (+)-5d (40 mg, 35%) as a colorless oil;  $[\alpha]_D = +32.1$  ( $c = 0.4$  in  $\text{CHCl}_3$ );  $^1\text{H NMR}$  (300 MHz,  $\text{CDCl}_3$ ):  $\delta = 1.43$  (s, 3H, Me), 1.52 (s, 3H, Me), 1.88 (s, 3H, Me), 2.18 (s, 3H, Me), 3.33 (s, 3H, OMe), 4.50 (dd, 1H,  $J = 7.1, 2.4$  Hz, H4), 4.95 (d, 1H,  $J = 2.3$  Hz, H2), 5.01 (d, 1H,  $J = 6.9$  Hz, OCH), 6.13 (s, 1H,

H1), 6.84 (d, 2H,  $J = 9.1$  Hz, Ar), 7.33 (d, 2H,  $J = 9.1$  Hz, Ar);  $^{13}\text{C}$  NMR (75 MHz,  $\text{CDCl}_3$ ):  $\delta = 157.0, 148.0, 146.5, 132.2$  (Ar, 2CH), 118.3 (Ar, 2CH), 117.2, 113.9, 112.9 (CH, H1), 111.7, 104.5 (CH, H2), 83.5 (CH, H4), 74.9 (OCH), 55.2 (OMe), 27.8 (Me), 26.9 (Me), 11.4 (Me), 9.9 (Me); IR ( $\text{CHCl}_3$ ):  $\nu = 1079\text{ cm}^{-1}$ ; HRMS (ES): calcd for  $\text{C}_{19}\text{H}_{23}\text{BrO}_5$  [ $M$ ] $^+$ : 410.0729; found: 410.0744.

**Fused Cyclopentene (+)-5e.** From 68 mg (0.13 mmol) of allene (–)-4e, and after chromatography of the residue using hexanes/ethyl acetate (20:1) as eluent gave tricycle (+)-5e (27 mg, 41%) as a colorless oil;  $[\alpha]_{\text{D}} = +41.5$  ( $c = 0.2$  in  $\text{CHCl}_3$ );  $^1\text{H}$  NMR (300 MHz,  $\text{CDCl}_3$ ):  $\delta = 1.53$  (s, 3H, Me), 1.57 (s, 3H, Me), 2.24 (s, 3H, Me), 3.33 (s, 3H, OMe), 4.30 (m, 2H,  $\text{OCH}_2$ ), 4.44 (m, 2H,  $\text{OCH}_2\text{Ar}$ ), 4.53 (dd, 1H,  $J = 7.4, 2.4$  Hz, H4), 4.98 (d, 1H,  $J = 2.3$  Hz, H2), 5.05 (d, 1H,  $J = 7.0$  Hz, OCH), 6.34 (s, 1H, H1), 6.85 (d, 2H,  $J = 9.1$  Hz, Ar), 7.29 (m, 2H, Ar), 7.32 (m, 3H, Ar), 7.36 (m, 2H, Ar);  $^{13}\text{C}$  NMR (75 MHz,  $\text{CDCl}_3$ ):  $\delta = 156.9, 150.6, 147.5, 138.0, 132.4$  (Ar, 2CH), 127.9 (Ar, 2CH), 127.8 (Ar, 2CH), 127.7 (Ar, CH), 118.4 (Ar, 2CH), 117.1, 114.0, 112.2, 111.9 (CH, H1), 104.2 (CH, H2), 83.4 (OCH), 77.5 (CH, H4), 71.6 ( $\text{OCH}_2\text{Ar}$ ), 63.2 ( $\text{OCH}_2$ ), 55.2 (OMe), 27.6 (Me), 27.1 (Me), 11.8 (Me); IR ( $\text{CHCl}_3$ ):  $\nu = 1074\text{ cm}^{-1}$ ; HRMS (ES): calcd for  $\text{C}_{26}\text{H}_{29}\text{BrO}_6$  [ $M$ ] $^+$ : 516.1148; found: 516.1154.



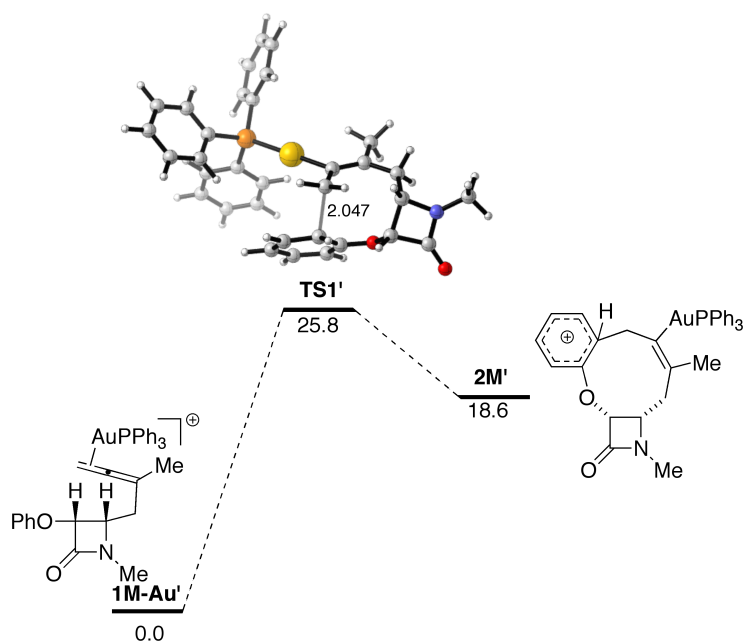

**Figure 1S.** Energy profile for the reaction between allenyl- $\beta$ -lactam **1M** and  $[(PPh_3)AuNTf_2]$  catalyst. Relative free energies ( $\Delta G$ , 298 K) have been computed at the PCM( $CH_2Cl_2$ )-M06/def2-SVP//PCM( $CH_2Cl_2$ )-B3LYP/def2-SVP level.

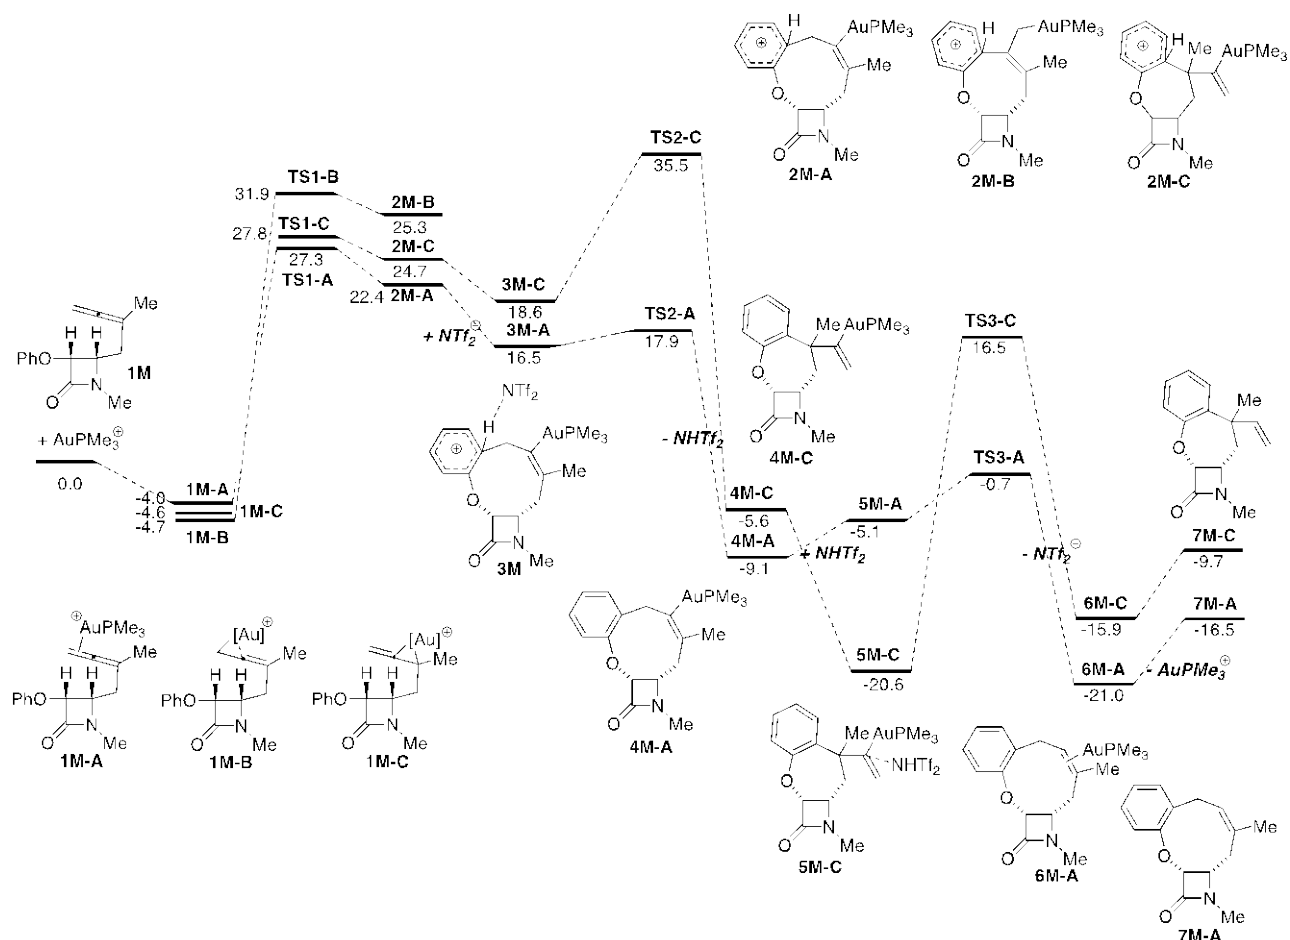

**Figure 2S.** Energy profile for the reaction between allenyl- $\beta$ -lactam **1M** and  $[(PMe_3)AuNTf_2]$  catalyst. Relative free energies ( $\Delta G$ , 298 K) have been computed at the PCM( $CH_2Cl_2$ )-B3LYP/def2-SVP level.

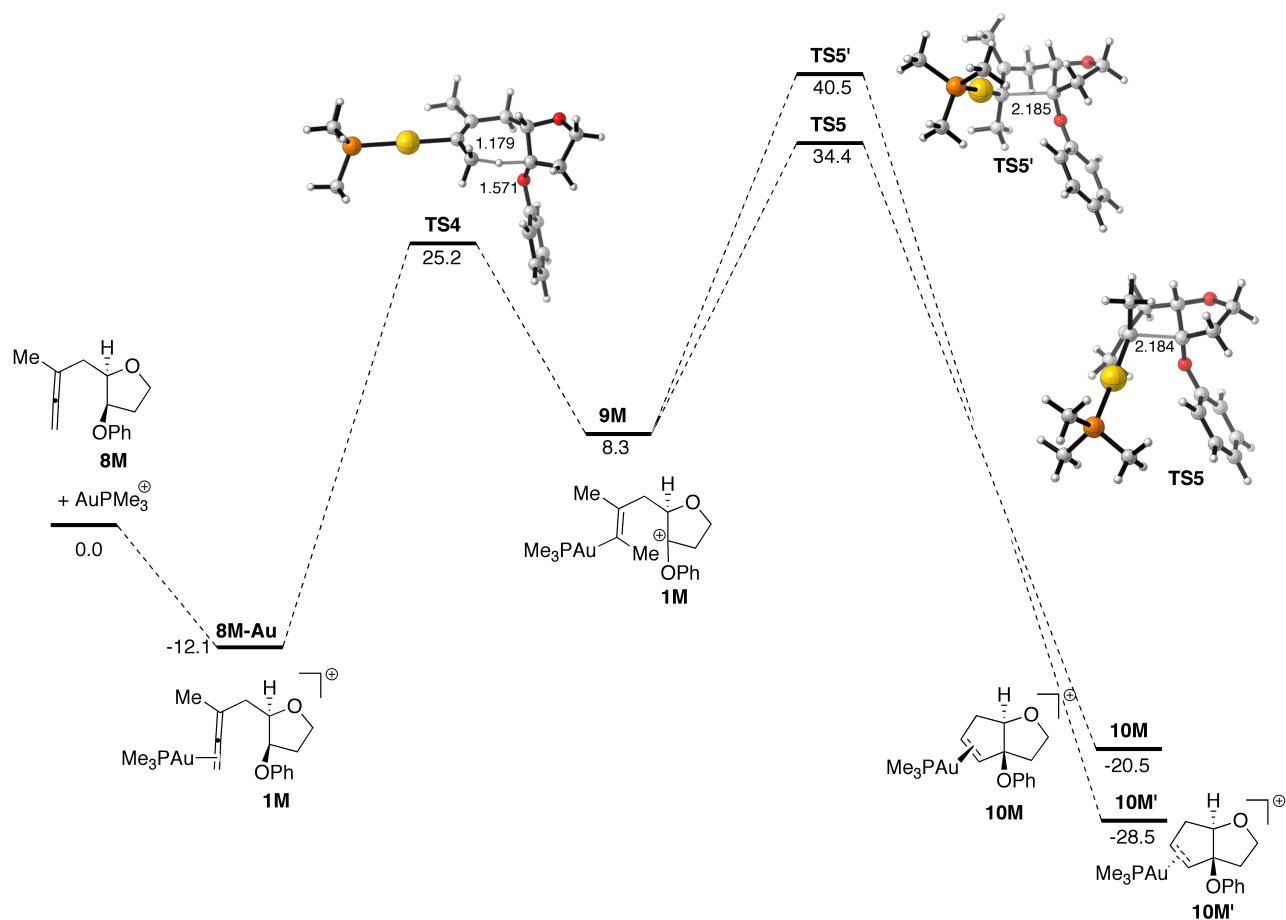

**Figure 3S.** Energy profile for the reaction between allenyl species **8M** and  $[(\text{PMe}_3)\text{AuNTf}_2]$  catalyst. Relative free energies ( $\Delta G$ , 298 K) have been computed at the  $\text{PCM}(\text{CH}_2\text{Cl}_2)\text{-M06/def2-SVP//PCM}(\text{CH}_2\text{Cl}_2)\text{-B3LYP/def2-SVP}$  level.

## Computational Details

All the calculations reported in this paper were obtained with the GAUSSIAN 09 suite of programs.<sup>1</sup> Geometry optimizations were performed using the B3LYP<sup>2</sup> hybrid functional in combination with the double- $\zeta$  quality plus polarization def2-SVP basis set<sup>3</sup> for all atoms and the Polarizable Continuum Model (PCM, using CH<sub>2</sub>Cl<sub>2</sub> as solvent)<sup>4</sup> to take into account solvent effects. This level is denoted PCM(CH<sub>2</sub>Cl<sub>2</sub>)-B3LYP/def2-SVP. Reactants and products were characterized by frequency calculations,<sup>5</sup> and have positive definite Hessian matrices. Transition structures (TS's) show only one negative eigenvalue in their diagonalized force constant matrices, and their associated eigenvectors were confirmed to correspond to the motion along the reaction coordinate under consideration using the Intrinsic Reaction Coordinate (IRC) method.<sup>6</sup> Single point energy calculations were computed using the dispersion-corrected meta-hybrid M06 functional, which has been recommended for transition metal containing species,<sup>7</sup> with the same PCM/def2-SVP combination on the PCM-B3LYP/def2-SVP optimized geometries. This level is denoted PCM(CH<sub>2</sub>Cl<sub>2</sub>)-M06/def2-SVP//PCM(CH<sub>2</sub>Cl<sub>2</sub>)-B3LYP/def2-SVP.

---

<sup>1</sup> Gaussian 09, Revision B.01, Frisch, M. J.; Trucks, G. W.; Schlegel, H. B.; Scuseria, G. E.; Robb, M. A.; Cheeseman, J. R.; Scalmani, G.; Barone, V.; Mennucci, B.; Petersson, G. A.; Nakatsuji, H.; Caricato, M.; Li, X.; Hratchian, H. P.; Izmaylov, A. F.; Bloino, J.; Zheng, G.; Sonnenberg, J. L.; Hada, M.; Ehara, M.; Toyota, K.; Fukuda, R.; Hasegawa, J.; Ishida, M.; Nakajima, T.; Honda, Y.; Kitao, O.; Nakai, H.; Vreven, T.; Montgomery, Jr., J. A.; Peralta, J. E.; Ogliaro, F.; Bearpark, M.; Heyd, J. J.; Brothers, E.; Kudin, K. N.; Staroverov, V. N.; Kobayashi, R.; Normand, J.; Raghavachari, K.; Rendell, A.; Burant, J. C.; Iyengar, S. S.; Tomasi, J.; Cossi, M.; Rega, N.; Millam, N. J.; Klene, M.; Knox, J. E.; Cross, J. B.; Bakken, V.; Adamo, C.; Jaramillo, J.; Gomperts, R.; Stratmann, R. E.; Yazyev, O.; Austin, A. J.; Cammi, R.; Pomelli, C.; Ochterski, J. W.; Martin, R. L.; Morokuma, K.; Zakrzewski, V. G.; Voth, G. A.; Salvador, P.; Dannenberg, J. J.; Dapprich, S.; Daniels, A. D.; Farkas, Ö.; Foresman, J. B.; Ortiz, J. V.; Cioslowski, J.; Fox, D. J. Gaussian, Inc., Wallingford CT, 2009.

<sup>2</sup> (a) Becke, A. D. *J. Chem. Phys.* **1993**, *98*, 5648. (b) Lee, C.; Yang, W.; Parr, R. G. *Phys. Rev. B* **1998**, *37*, 785. (c) Vosko, S. H.; Wilk, L.; Nusair, M. *Can. J. Phys.* **1980**, *58*, 1200.

<sup>3</sup> Weigend, F.; Alhrichs, R. *Phys. Chem. Chem. Phys.* **2005**, *7*, 3297.

<sup>4</sup> (a) Miertuš, S.; Scrocco, E.; Tomasi, J. *Chem. Phys.* **1981**, *55*, 117. (b) Pascual-Ahuir, J. L.; Silla, E.; Tuñón, I. *J. Comp. Chem.* **1994**, *15*, 1127. (c) Barone, V.; Cossi, M. *J. Phys. Chem. A*, 1998, *102*, 1995.

<sup>5</sup> McIver, J. W.; Komornicki, A. K. *J. Am. Chem. Soc.* **1972**, *94*, 2625.

<sup>6</sup> González, C.; Schlegel, H. B. *J. Phys. Chem.* **1990**, *94*, 5523.

<sup>7</sup> Zhao, J.; Truhlar, D. G. *Acc. Chem. Res.* **2008**, *41*, 157.

Cartesian coordinates (in Å) and total energies (in a. u., non corrected zero-point vibrational energies included) of all the stationary points discussed in the text. All calculations have been performed at the PCM(CH<sub>2</sub>Cl<sub>2</sub>)-B3LYP/def2-SVP + ΔZPVE level.

**Profile in Figure 1 (main text).**

**1M:** E= -786.110736

|   |              |              |              |
|---|--------------|--------------|--------------|
| C | 0.159094000  | 2.450434000  | 0.341882000  |
| C | 1.513889000  | 2.111897000  | 0.197955000  |
| C | 2.501508000  | 3.103720000  | 0.286008000  |
| C | 2.119246000  | 4.432955000  | 0.504591000  |
| C | 0.772753000  | 4.779061000  | 0.645894000  |
| C | -0.204458000 | 3.778051000  | 0.569189000  |
| O | 1.789793000  | 0.787098000  | -0.006806000 |
| C | 2.982619000  | 0.417637000  | -0.648424000 |
| C | 3.089746000  | -1.113798000 | -0.941742000 |
| C | 1.957795000  | -2.012924000 | -0.463337000 |
| C | 0.739474000  | -2.069289000 | -1.368649000 |
| C | 0.666150000  | -1.424514000 | -2.513891000 |
| C | 0.577960000  | -0.788639000 | -3.658329000 |
| C | -0.404253000 | -2.926607000 | -0.868105000 |
| C | 4.250272000  | 0.211080000  | 0.225463000  |
| O | 4.974007000  | 0.918076000  | 0.897232000  |
| N | 4.293990000  | -1.111039000 | -0.091395000 |
| C | 5.291009000  | -2.120668000 | 0.162412000  |
| H | 5.747682000  | -2.473847000 | -0.777964000 |
| H | 4.864255000  | -2.987850000 | 0.692166000  |
| H | 6.074895000  | -1.676302000 | 0.792094000  |
| H | 2.349504000  | -3.041278000 | -0.352945000 |
| H | 1.640221000  | -1.699405000 | 0.545420000  |
| H | 0.173404000  | 0.229424000  | -3.720427000 |
| H | 0.905684000  | -1.247480000 | -4.599598000 |
| H | 3.557728000  | 2.836217000  | 0.227812000  |
| H | 3.173820000  | 1.053118000  | -1.530027000 |
| H | 3.330247000  | -1.327427000 | -1.997134000 |
| H | 2.892462000  | 5.202588000  | 0.575253000  |
| H | 0.485122000  | 5.818585000  | 0.819572000  |
| H | -1.261547000 | 4.033854000  | 0.679834000  |
| H | -0.590606000 | 1.659767000  | 0.267945000  |
| H | -1.243356000 | -2.944740000 | -1.577073000 |
| H | -0.774211000 | -2.548417000 | 0.100643000  |
| H | -0.066098000 | -3.963918000 | -0.699959000 |

**1M-Au:** E= -1382.604105

|    |              |              |              |
|----|--------------|--------------|--------------|
| C  | 0.247313000  | 2.714473000  | 0.203032000  |
| C  | 1.573707000  | 2.263543000  | 0.133200000  |
| C  | 2.635284000  | 3.176838000  | 0.193283000  |
| C  | 2.354506000  | 4.543143000  | 0.315103000  |
| C  | 1.036349000  | 5.001916000  | 0.386336000  |
| C  | -0.015748000 | 4.078929000  | 0.334446000  |
| O  | 1.753794000  | 0.906373000  | 0.027517000  |
| C  | 2.907131000  | 0.415609000  | -0.604123000 |
| C  | 2.913371000  | -1.136476000 | -0.797377000 |
| C  | 1.752008000  | -1.944845000 | -0.208728000 |
| C  | 0.589140000  | -2.166052000 | -1.179753000 |
| Au | -1.386374000 | -1.073719000 | -0.313044000 |
| P  | -3.233022000 | -0.583758000 | 1.040879000  |
| C  | -3.993710000 | -2.098385000 | 1.730495000  |
| C  | 0.136260000  | -1.183786000 | -1.998262000 |
| C  | 0.012432000  | -0.375701000 | -3.030476000 |
| C  | 0.156131000  | -3.605628000 | -1.384445000 |
| C  | 4.180645000  | 0.184654000  | 0.255530000  |
| O  | 4.960828000  | 0.883223000  | 0.866623000  |
| N  | 4.138897000  | -1.155413000 | 0.015129000  |

|   |              |              |              |
|---|--------------|--------------|--------------|
| C | 5.091608000  | -2.203571000 | 0.288869000  |
| C | -4.567512000 | 0.276073000  | 0.131835000  |
| C | -2.827315000 | 0.475299000  | 2.475648000  |
| H | 5.499898000  | -2.622919000 | -0.646103000 |
| H | 4.640032000  | -3.020225000 | 0.874763000  |
| H | 5.915445000  | -1.769157000 | 0.872299000  |
| H | 2.129679000  | -2.939683000 | 0.072552000  |
| H | 1.411012000  | -1.468595000 | 0.722012000  |
| H | -0.761884000 | 0.392694000  | -3.095796000 |
| H | 0.710001000  | -0.464033000 | -3.872038000 |
| H | 3.667832000  | 2.823809000  | 0.187184000  |
| H | 3.123023000  | 0.974093000  | -1.530689000 |
| H | 3.101742000  | -1.439913000 | -1.841907000 |
| H | 3.184321000  | 5.252830000  | 0.365259000  |
| H | 0.828555000  | 6.069758000  | 0.485289000  |
| H | -1.051362000 | 4.424630000  | 0.387735000  |
| H | -0.560107000 | 1.981012000  | 0.145286000  |
| H | -0.717877000 | -3.691545000 | -2.042555000 |
| H | -0.057368000 | -4.099315000 | -0.424210000 |
| H | 1.000114000  | -4.145809000 | -1.848219000 |
| H | -5.425637000 | 0.446950000  | 0.800032000  |
| H | -4.198282000 | 1.241079000  | -0.243856000 |
| H | -4.884875000 | -0.340699000 | -0.721160000 |
| H | -2.079215000 | -0.030111000 | 3.103247000  |
| H | -2.408480000 | 1.429310000  | 2.124853000  |
| H | -3.733749000 | 0.668937000  | 3.069578000  |
| H | -4.869277000 | -1.835286000 | 2.343647000  |
| H | -4.307225000 | -2.758000000 | 0.908683000  |
| H | -3.257602000 | -2.628635000 | 2.351621000  |

**TS1:** E= -1382.557542

|    |              |              |              |
|----|--------------|--------------|--------------|
| C  | -4.699571000 | 0.479538000  | 0.245188000  |
| N  | -4.603673000 | -0.812990000 | -0.174782000 |
| C  | -5.582489000 | -1.717051000 | -0.728302000 |
| C  | -0.775469000 | -1.100166000 | -1.053073000 |
| C  | -2.294333000 | -1.214709000 | -1.031433000 |
| C  | 0.122431000  | -0.885187000 | -0.026063000 |
| C  | -0.316992000 | -0.868637000 | 1.347539000  |
| C  | -0.733975000 | 1.001189000  | 2.068667000  |
| C  | -1.252232000 | 1.728937000  | 0.944190000  |
| O  | -2.399206000 | 1.419410000  | 0.331066000  |
| C  | -3.267610000 | 0.427333000  | 0.827910000  |
| C  | -3.187291000 | -1.004496000 | 0.192097000  |
| C  | 0.493340000  | 1.471236000  | 2.653196000  |
| C  | 1.219451000  | 2.487998000  | 2.077901000  |
| C  | 0.710744000  | 3.131569000  | 0.924020000  |
| C  | -0.505425000 | 2.763440000  | 0.363951000  |
| C  | -0.281571000 | -1.246424000 | -2.471247000 |
| O  | -5.584507000 | 1.301211000  | 0.206693000  |
| Au | 2.178662000  | -0.617413000 | -0.339118000 |
| P  | 4.509408000  | -0.343389000 | -0.673107000 |
| H  | -5.699695000 | -2.608347000 | -0.090109000 |
| H  | -5.306618000 | -2.042898000 | -1.744290000 |
| H  | -6.543653000 | -1.186704000 | -0.779324000 |
| H  | -2.527590000 | -2.224043000 | -1.419677000 |
| H  | -2.659978000 | -0.534829000 | -1.821302000 |
| H  | 0.438578000  | -1.050136000 | 2.112827000  |
| H  | -1.277277000 | -1.315773000 | 1.615685000  |
| H  | -1.443878000 | 0.537913000  | 2.757444000  |
| H  | -3.286831000 | 0.415278000  | 1.927145000  |
| H  | -3.065843000 | -1.807701000 | 0.937036000  |
| H  | 0.847917000  | 0.982577000  | 3.563747000  |
| H  | 2.165082000  | 2.814196000  | 2.513676000  |
| H  | 1.280159000  | 3.944803000  | 0.467198000  |
| H  | -0.905953000 | 3.267741000  | -0.516583000 |
| H  | 0.809363000  | -1.353757000 | -2.518221000 |
| H  | -0.564814000 | -0.353879000 | -3.059044000 |

|   |              |              |              |
|---|--------------|--------------|--------------|
| H | -0.752474000 | -2.108514000 | -2.972294000 |
| C | 5.358350000  | 0.655513000  | 0.613042000  |
| H | 6.435506000  | 0.734021000  | 0.399221000  |
| H | 4.919557000  | 1.663621000  | 0.642278000  |
| H | 5.216335000  | 0.181882000  | 1.595597000  |
| C | 4.941700000  | 0.482199000  | -2.255462000 |
| H | 4.532049000  | -0.099792000 | -3.094045000 |
| H | 4.497149000  | 1.488021000  | -2.277386000 |
| H | 6.033857000  | 0.562938000  | -2.368049000 |
| C | 5.446034000  | -1.922522000 | -0.714689000 |
| H | 6.517528000  | -1.735576000 | -0.886054000 |
| H | 5.316551000  | -2.450067000 | 0.241637000  |
| H | 5.053829000  | -2.559031000 | -1.521404000 |

**2M:** E= - 1382. 565914

|    |              |              |              |
|----|--------------|--------------|--------------|
| C  | 5.322579000  | 0.107485000  | -0.111614000 |
| N  | 5.034573000  | -1.218741000 | -0.191859000 |
| C  | 5.871139000  | -2.388822000 | -0.082141000 |
| C  | 1.135724000  | -1.435390000 | 0.464777000  |
| C  | 2.655019000  | -1.635354000 | 0.506333000  |
| C  | 0.388665000  | -0.629674000 | -0.330674000 |
| C  | 0.985112000  | 0.232404000  | -1.430116000 |
| C  | 1.247917000  | 1.722167000  | -0.967481000 |
| C  | 2.067575000  | 1.865995000  | 0.272782000  |
| O  | 3.216081000  | 1.258802000  | 0.444620000  |
| C  | 3.882724000  | 0.476549000  | -0.543987000 |
| C  | 3.606111000  | -1.062414000 | -0.540488000 |
| C  | -0.009002000 | 2.518742000  | -0.956019000 |
| C  | -0.366290000 | 3.331732000  | 0.075350000  |
| C  | 0.472702000  | 3.403729000  | 1.225295000  |
| C  | 1.652951000  | 2.688358000  | 1.330846000  |
| C  | 0.501972000  | -2.280882000 | 1.553056000  |
| O  | 6.321759000  | 0.730237000  | 0.161041000  |
| Au | -1.685384000 | -0.440567000 | -0.141902000 |
| P  | -4.052904000 | -0.259947000 | 0.052323000  |
| H  | 5.858325000  | -2.970385000 | -1.018743000 |
| H  | 5.546957000  | -3.041126000 | 0.744457000  |
| H  | 6.899164000  | -2.055014000 | 0.116054000  |
| H  | 2.835632000  | -2.725717000 | 0.517776000  |
| H  | 3.003238000  | -1.289211000 | 1.497350000  |
| H  | 0.285681000  | 0.323990000  | -2.272832000 |
| H  | 1.900351000  | -0.176431000 | -1.869337000 |
| H  | 1.860224000  | 2.166031000  | -1.786673000 |
| H  | 3.828074000  | 0.965343000  | -1.526960000 |
| H  | 3.390959000  | -1.458489000 | -1.546434000 |
| H  | -0.630395000 | 2.446795000  | -1.851671000 |
| H  | -1.285638000 | 3.917460000  | 0.038341000  |
| H  | 0.177900000  | 4.051292000  | 2.055336000  |
| H  | 2.287232000  | 2.758120000  | 2.215131000  |
| H  | -0.585720000 | -2.135222000 | 1.604525000  |
| H  | 0.930443000  | -2.039796000 | 2.542690000  |
| H  | 0.699959000  | -3.354534000 | 1.383241000  |
| C  | -4.864670000 | 0.723200000  | -1.271181000 |
| H  | -5.953949000 | 0.765334000  | -1.115841000 |
| H  | -4.458191000 | 1.745374000  | -1.269426000 |
| H  | -4.654278000 | 0.264760000  | -2.248720000 |
| C  | -4.628678000 | 0.525720000  | 1.610643000  |
| H  | -4.259145000 | -0.052757000 | 2.470083000  |
| H  | -4.223576000 | 1.546314000  | 1.676530000  |
| H  | -5.728446000 | 0.567016000  | 1.645531000  |
| C  | -4.927785000 | -1.875322000 | 0.013046000  |
| H  | -6.015257000 | -1.734119000 | 0.112139000  |
| H  | -4.711668000 | -2.384412000 | -0.937757000 |
| H  | -4.566305000 | -2.507125000 | 0.837755000  |

**3M:** E= - 3208. 797590

|    |              |              |              |
|----|--------------|--------------|--------------|
| C  | -2.534858000 | 3.582166000  | 0.045070000  |
| N  | -1.890723000 | 4.012701000  | -1.072995000 |
| C  | -2.175548000 | 5.091370000  | -1.985833000 |
| C  | 1.721245000  | 2.432144000  | -0.768519000 |
| C  | 0.540713000  | 3.390330000  | -0.954653000 |
| C  | 1.723707000  | 1.089328000  | -0.573267000 |
| C  | 0.459815000  | 0.245641000  | -0.561603000 |
| C  | -0.080755000 | -0.038706000 | 0.894360000  |
| C  | -0.300430000 | 1.150495000  | 1.751639000  |
| O  | -0.932299000 | 2.227023000  | 1.340933000  |
| C  | -1.646231000 | 2.319588000  | 0.108058000  |
| C  | -0.898322000 | 2.916295000  | -1.125652000 |
| C  | 0.638706000  | -1.143826000 | 1.562357000  |
| C  | 1.034721000  | -1.099098000 | 2.866692000  |
| C  | 0.792893000  | 0.083434000  | 3.619566000  |
| C  | 0.148753000  | 1.184571000  | 3.081511000  |
| C  | 3.008471000  | 3.235583000  | -0.775262000 |
| O  | -3.457912000 | 4.021053000  | 0.692886000  |
| Au | 3.470166000  | -0.004210000 | -0.221792000 |
| P  | 5.452605000  | -1.273261000 | 0.150647000  |
| H  | -2.405796000 | 4.706242000  | -2.993430000 |
| H  | -1.328199000 | 5.791997000  | -2.061035000 |
| H  | -3.050328000 | 5.637821000  | -1.606095000 |
| H  | 0.767543000  | 4.016343000  | -1.837354000 |
| H  | 0.558648000  | 4.098032000  | -0.104510000 |
| H  | 0.655942000  | -0.751121000 | -0.980294000 |
| H  | -0.355874000 | 0.639097000  | -1.174429000 |
| H  | -2.187920000 | 1.388935000  | -0.101458000 |
| H  | -1.030379000 | 2.297903000  | -2.026913000 |
| H  | 0.805748000  | -2.040565000 | 0.961030000  |
| H  | 1.535694000  | -1.948011000 | 3.333972000  |
| H  | 1.118068000  | 0.124433000  | 4.662583000  |
| H  | -0.039526000 | 2.082010000  | 3.671888000  |
| H  | 3.889716000  | 2.601460000  | -0.606044000 |
| H  | 2.991300000  | 4.018612000  | 0.004690000  |
| H  | 3.140721000  | 3.761792000  | -1.738004000 |
| N  | -2.856269000 | -1.056244000 | -0.096012000 |
| S  | -3.330974000 | -0.989158000 | -1.645036000 |
| S  | -3.685117000 | -1.788519000 | 1.095362000  |
| O  | -4.761187000 | -1.186803000 | -1.885001000 |
| O  | -2.647082000 | 0.151170000  | -2.271106000 |
| O  | -4.606388000 | -2.846186000 | 0.676956000  |
| O  | -2.741513000 | -2.033523000 | 2.190278000  |
| C  | -2.493315000 | -2.494734000 | -2.394194000 |
| C  | -4.774878000 | -0.398099000 | 1.735664000  |
| F  | -4.020047000 | 0.638500000  | 2.106560000  |
| F  | -5.459484000 | -0.831295000 | 2.791304000  |
| F  | -5.625804000 | 0.003297000  | 0.797343000  |
| F  | -2.767394000 | -2.548007000 | -3.694913000 |
| F  | -2.930912000 | -3.605475000 | -1.809528000 |
| F  | -1.171107000 | -2.416293000 | -2.234610000 |
| H  | -1.112206000 | -0.460200000 | 0.691187000  |
| C  | 6.736750000  | -1.061375000 | -1.147723000 |
| H  | 7.016621000  | 0.000257000  | -1.214574000 |
| H  | 7.631752000  | -1.660091000 | -0.916692000 |
| H  | 6.328748000  | -1.375977000 | -2.119591000 |
| C  | 6.332173000  | -0.868584000 | 1.713325000  |
| H  | 7.241825000  | -1.479743000 | 1.821851000  |
| H  | 6.607117000  | 0.196544000  | 1.711525000  |
| H  | 5.664539000  | -1.054347000 | 2.567531000  |
| C  | 5.203564000  | -3.092333000 | 0.236815000  |
| H  | 4.754875000  | -3.444309000 | -0.703825000 |
| H  | 6.160446000  | -3.612020000 | 0.400748000  |
| H  | 4.515897000  | -3.329543000 | 1.061875000  |

**TS2: E= -3208.798034**

|   |              |             |              |
|---|--------------|-------------|--------------|
| C | -2.619551000 | 3.733406000 | -0.194965000 |
|---|--------------|-------------|--------------|

|    |              |              |              |
|----|--------------|--------------|--------------|
| N  | -1.793122000 | 4.280189000  | -1.127281000 |
| C  | -1.914266000 | 5.468426000  | -1.933753000 |
| C  | 1.733022000  | 2.599395000  | -0.516256000 |
| C  | 0.584541000  | 3.599281000  | -0.677904000 |
| C  | 1.697193000  | 1.243476000  | -0.479911000 |
| C  | 0.415554000  | 0.427512000  | -0.650717000 |
| C  | -0.211257000 | 0.046426000  | 0.716570000  |
| C  | -0.712803000 | 1.079231000  | 1.603297000  |
| O  | -1.267581000 | 2.223637000  | 1.193125000  |
| C  | -1.747005000 | 2.458934000  | -0.119708000 |
| C  | -0.805564000 | 3.179918000  | -1.139042000 |
| C  | 0.408363000  | -1.088597000 | 1.374673000  |
| C  | 0.440867000  | -1.240410000 | 2.740646000  |
| C  | -0.097079000 | -0.218844000 | 3.551857000  |
| C  | -0.670534000 | 0.916006000  | 2.997031000  |
| C  | 3.028294000  | 3.366559000  | -0.324038000 |
| O  | -3.643835000 | 4.112847000  | 0.327478000  |
| Au | 3.400740000  | 0.082060000  | -0.129458000 |
| P  | 5.330335000  | -1.266011000 | 0.242056000  |
| H  | -1.956597000 | 5.216399000  | -3.006936000 |
| H  | -1.071553000 | 6.159244000  | -1.768023000 |
| H  | -2.846101000 | 5.979088000  | -1.652304000 |
| H  | 0.926203000  | 4.371090000  | -1.392001000 |
| H  | 0.473199000  | 4.140304000  | 0.280762000  |
| H  | 0.642552000  | -0.524047000 | -1.151345000 |
| H  | -0.318691000 | 0.904288000  | -1.301765000 |
| H  | -2.244470000 | 1.570565000  | -0.529193000 |
| H  | -0.773615000 | 2.679523000  | -2.120834000 |
| H  | 0.817169000  | -1.867388000 | 0.726212000  |
| H  | 0.878330000  | -2.131281000 | 3.194046000  |
| H  | -0.075616000 | -0.324572000 | 4.639530000  |
| H  | -1.094444000 | 1.704295000  | 3.620772000  |
| H  | 3.878453000  | 2.697486000  | -0.131312000 |
| H  | 2.948437000  | 4.074635000  | 0.521261000  |
| H  | 3.263732000  | 3.976433000  | -1.215470000 |
| N  | -2.593315000 | -1.136403000 | -0.095723000 |
| S  | -2.952324000 | -1.254172000 | -1.702061000 |
| S  | -3.557094000 | -1.767241000 | 1.093639000  |
| O  | -4.363027000 | -1.510707000 | -1.970472000 |
| O  | -2.249145000 | -0.168362000 | -2.386974000 |
| O  | -4.371092000 | -2.895741000 | 0.656092000  |
| O  | -2.736044000 | -1.850076000 | 2.298310000  |
| C  | -2.041752000 | -2.819594000 | -2.212294000 |
| C  | -4.750653000 | -0.350852000 | 1.431643000  |
| F  | -4.058819000 | 0.738242000  | 1.764429000  |
| F  | -5.539034000 | -0.695745000 | 2.442365000  |
| F  | -5.488132000 | -0.089271000 | 0.362045000  |
| F  | -2.205120000 | -2.998225000 | -3.516918000 |
| F  | -2.524409000 | -3.865353000 | -1.556011000 |
| F  | -0.741672000 | -2.697810000 | -1.945278000 |
| H  | -1.345769000 | -0.532472000 | 0.367646000  |
| C  | 6.636773000  | -1.086194000 | -1.039323000 |
| H  | 6.958064000  | -0.035300000 | -1.087592000 |
| H  | 7.505741000  | -1.722209000 | -0.808738000 |
| H  | 6.227382000  | -1.370394000 | -2.020016000 |
| C  | 6.208073000  | -0.919564000 | 1.819824000  |
| H  | 7.091956000  | -1.567330000 | 1.929610000  |
| H  | 6.524471000  | 0.133867000  | 1.836398000  |
| H  | 5.523848000  | -1.090545000 | 2.663974000  |
| C  | 5.011132000  | -3.075824000 | 0.298446000  |
| H  | 4.565602000  | -3.397589000 | -0.654471000 |
| H  | 5.944155000  | -3.634478000 | 0.471196000  |
| H  | 4.300348000  | -3.297573000 | 1.108142000  |

**4M:** E= -1382.185841

|   |              |             |              |
|---|--------------|-------------|--------------|
| C | -2.363859000 | 3.186832000 | -0.947248000 |
| C | -2.226286000 | 1.953519000 | -0.297601000 |



|    |              |              |              |
|----|--------------|--------------|--------------|
| C  | -1.171678000 | 1.721275000  | 0.611371000  |
| C  | -0.287128000 | 2.788413000  | 0.847481000  |
| C  | -0.415830000 | 4.022992000  | 0.204938000  |
| C  | -1.457747000 | 4.220593000  | -0.705740000 |
| C  | -0.925426000 | 0.372365000  | 1.270168000  |
| Au | 1.766270000  | -0.452828000 | 0.108383000  |
| P  | 4.123505000  | -0.165114000 | -0.103848000 |
| O  | -3.151707000 | 0.990077000  | -0.638393000 |
| C  | -3.841215000 | 0.304575000  | 0.370247000  |
| C  | -3.496809000 | -1.207121000 | 0.608570000  |
| C  | -2.521911000 | -1.860963000 | -0.364869000 |
| C  | -1.011046000 | -1.615382000 | -0.330634000 |
| C  | -0.337396000 | -2.606090000 | -1.263880000 |
| C  | -5.244211000 | -0.202997000 | -0.042134000 |
| O  | -6.266253000 | 0.299585000  | -0.459109000 |
| N  | -4.911751000 | -1.482943000 | 0.283640000  |
| C  | -5.696878000 | -2.688996000 | 0.341752000  |
| H  | -5.700485000 | -3.112862000 | 1.360521000  |
| H  | -5.320068000 | -3.456772000 | -0.354337000 |
| H  | -6.729457000 | -2.438354000 | 0.059143000  |
| H  | -2.675460000 | -2.952797000 | -0.276188000 |
| H  | -2.867453000 | -1.614933000 | -1.386753000 |
| H  | -0.234042000 | 0.546778000  | 2.108047000  |
| H  | -1.844875000 | 0.002283000  | 1.738834000  |
| H  | -3.884584000 | 0.892873000  | 1.301578000  |
| H  | -3.263012000 | -1.461226000 | 1.656348000  |
| H  | 0.533101000  | 2.632913000  | 1.554312000  |
| H  | 0.296311000  | 4.825031000  | 0.414454000  |
| H  | -1.574519000 | 5.178623000  | -1.218673000 |
| H  | -3.199457000 | 3.310960000  | -1.639507000 |
| H  | 0.745474000  | -2.432690000 | -1.335968000 |
| H  | -0.764077000 | -2.546327000 | -2.282339000 |
| H  | -0.498440000 | -3.646279000 | -0.924708000 |
| C  | -0.301740000 | -0.664723000 | 0.328186000  |
| C  | 4.629931000  | 1.184456000  | -1.246103000 |
| H  | 4.204579000  | 2.136619000  | -0.896112000 |
| H  | 5.726834000  | 1.270782000  | -1.293985000 |
| H  | 4.235836000  | 0.977534000  | -2.252021000 |
| C  | 5.022578000  | -1.639664000 | -0.735882000 |
| H  | 4.632206000  | -1.906728000 | -1.729122000 |
| H  | 6.103329000  | -1.442086000 | -0.810450000 |
| H  | 4.853644000  | -2.488088000 | -0.056401000 |
| C  | 4.993102000  | 0.241609000  | 1.465304000  |
| H  | 4.824683000  | -0.562902000 | 2.196430000  |
| H  | 6.074914000  | 0.360410000  | 1.296863000  |
| H  | 4.584340000  | 1.176491000  | 1.876445000  |

**5M:** E= -3208.833584

|    |              |              |              |
|----|--------------|--------------|--------------|
| C  | 3.295667000  | -4.154640000 | 0.971041000  |
| C  | 2.932371000  | -2.814028000 | 0.795269000  |
| C  | 1.757663000  | -2.293281000 | 1.377843000  |
| C  | 0.987603000  | -3.171278000 | 2.159703000  |
| C  | 1.343450000  | -4.510402000 | 2.345400000  |
| C  | 2.500679000  | -5.007613000 | 1.738966000  |
| C  | 1.282046000  | -0.871116000 | 1.129554000  |
| Au | -1.131772000 | -1.572671000 | -0.601017000 |
| P  | -3.243331000 | -2.617724000 | -0.925796000 |
| O  | 3.762442000  | -2.055814000 | -0.003310000 |
| C  | 4.282409000  | -0.859779000 | 0.510969000  |
| C  | 3.780093000  | 0.498249000  | -0.088930000 |
| C  | 2.876554000  | 0.435541000  | -1.317634000 |
| C  | 1.430569000  | -0.065449000 | -1.289992000 |
| C  | 0.827445000  | 0.111710000  | -2.672703000 |
| C  | 5.670616000  | -0.456766000 | -0.041107000 |
| O  | 6.771532000  | -0.963553000 | -0.090559000 |
| N  | 5.194260000  | 0.756426000  | -0.436425000 |
| C  | 5.859894000  | 1.917240000  | -0.969144000 |

|   |              |              |              |
|---|--------------|--------------|--------------|
| H | 5.715357000  | 2.794406000  | -0.315587000 |
| H | 5.495504000  | 2.170323000  | -1.978802000 |
| H | 6.935135000  | 1.696117000  | -1.032205000 |
| H | 2.861909000  | 1.451605000  | -1.752904000 |
| H | 3.397884000  | -0.182938000 | -2.072070000 |
| H | 0.474459000  | -0.668329000 | 1.849523000  |
| H | 2.069170000  | -0.149624000 | 1.377760000  |
| H | 4.281742000  | -0.863853000 | 1.613490000  |
| H | 3.401394000  | 1.216090000  | 0.654348000  |
| H | 0.076284000  | -2.786180000 | 2.626213000  |
| H | 0.716491000  | -5.162092000 | 2.959003000  |
| H | 2.792814000  | -6.052380000 | 1.871683000  |
| H | 4.215387000  | -4.504229000 | 0.497000000  |
| H | -0.207106000 | -0.255268000 | -2.720890000 |
| H | 1.419928000  | -0.429192000 | -3.432525000 |
| H | 0.834405000  | 1.174411000  | -2.974074000 |
| C | 0.731189000  | -0.660198000 | -0.285214000 |
| N | -0.776785000 | 2.177649000  | 0.202573000  |
| S | -2.461708000 | 2.298215000  | 0.127441000  |
| S | 0.271227000  | 3.359072000  | 0.803999000  |
| O | -2.919867000 | 1.326879000  | -0.852371000 |
| O | -2.836095000 | 3.699616000  | 0.085980000  |
| O | 1.518406000  | 2.684279000  | 1.126008000  |
| O | -0.437468000 | 4.211201000  | 1.740223000  |
| C | 0.623076000  | 4.399730000  | -0.731321000 |
| C | -2.986866000 | 1.643236000  | 1.821344000  |
| F | -2.388243000 | 0.483699000  | 2.061730000  |
| F | -4.299883000 | 1.470366000  | 1.793745000  |
| F | -2.662524000 | 2.516436000  | 2.756837000  |
| F | 1.510760000  | 5.321480000  | -0.394768000 |
| F | -0.488243000 | 4.972519000  | -1.156192000 |
| F | 1.121575000  | 3.622578000  | -1.685236000 |
| H | -0.330888000 | 1.274970000  | -0.098465000 |
| C | -3.377452000 | -4.347467000 | -0.319234000 |
| H | -3.162779000 | -4.372659000 | 0.759312000  |
| H | -4.386003000 | -4.750922000 | -0.499693000 |
| H | -2.636081000 | -4.974467000 | -0.836134000 |
| C | -3.765404000 | -2.718967000 | -2.685400000 |
| H | -3.030477000 | -3.310359000 | -3.251145000 |
| H | -4.758089000 | -3.186955000 | -2.776030000 |
| H | -3.800139000 | -1.705625000 | -3.111931000 |
| C | -4.632959000 | -1.742427000 | -0.100340000 |
| H | -4.652927000 | -0.698926000 | -0.446273000 |
| H | -5.595767000 | -2.228277000 | -0.322700000 |
| H | -4.466710000 | -1.742211000 | 0.987043000  |

**TS3:** E= -3208.828771

|    |              |              |              |
|----|--------------|--------------|--------------|
| C  | 2.811275000  | -4.022970000 | 1.152504000  |
| C  | 2.621744000  | -2.652859000 | 0.936572000  |
| C  | 1.521911000  | -1.969718000 | 1.495618000  |
| C  | 0.645028000  | -2.718491000 | 2.300292000  |
| C  | 0.827666000  | -4.085638000 | 2.527139000  |
| C  | 1.912870000  | -4.744014000 | 1.940937000  |
| C  | 1.231273000  | -0.504418000 | 1.215515000  |
| Au | -1.029292000 | -1.397472000 | -0.680306000 |
| P  | -2.917081000 | -2.724573000 | -1.113610000 |
| O  | 3.542853000  | -2.028299000 | 0.121505000  |
| C  | 4.207011000  | -0.892910000 | 0.607001000  |
| C  | 3.885086000  | 0.490890000  | -0.051368000 |
| C  | 2.996470000  | 0.481677000  | -1.291860000 |
| C  | 1.504630000  | 0.191810000  | -1.247845000 |
| C  | 0.890996000  | 0.426347000  | -2.611494000 |
| C  | 5.641817000  | -0.684876000 | 0.063801000  |
| O  | 6.672015000  | -1.323389000 | 0.051951000  |
| N  | 5.321703000  | 0.561888000  | -0.385003000 |
| C  | 6.129958000  | 1.616668000  | -0.941969000 |
| H  | 6.083627000  | 2.525002000  | -0.317579000 |

|   |              |              |              |
|---|--------------|--------------|--------------|
| H | 5.811876000  | 1.878773000  | -1.964751000 |
| H | 7.171105000  | 1.265533000  | -0.979983000 |
| H | 3.110993000  | 1.466763000  | -1.778409000 |
| H | 3.425009000  | -0.237958000 | -2.014183000 |
| H | 0.442121000  | -0.194293000 | 1.916656000  |
| H | 2.091234000  | 0.125340000  | 1.468134000  |
| H | 4.190743000  | -0.857438000 | 1.708391000  |
| H | 3.579073000  | 1.281055000  | 0.651523000  |
| H | -0.209986000 | -2.206791000 | 2.751244000  |
| H | 0.123737000  | -4.633305000 | 3.158512000  |
| H | 2.069728000  | -5.812818000 | 2.106589000  |
| H | 3.680127000  | -4.500595000 | 0.694698000  |
| H | -0.206682000 | 0.387361000  | -2.581565000 |
| H | 1.236556000  | -0.349475000 | -3.317055000 |
| H | 1.205132000  | 1.395802000  | -3.030353000 |
| C | 0.717605000  | -0.228898000 | -0.205570000 |
| N | -0.799572000 | 2.014693000  | 0.227797000  |
| S | -2.462441000 | 2.104184000  | 0.226246000  |
| S | 0.165221000  | 3.270235000  | 0.744453000  |
| O | -2.956670000 | 1.119325000  | -0.731269000 |
| O | -2.946047000 | 3.478589000  | 0.205246000  |
| O | 1.486052000  | 2.714083000  | 1.020746000  |
| O | -0.504546000 | 4.139322000  | 1.702312000  |
| C | 0.396355000  | 4.292825000  | -0.822868000 |
| C | -2.919442000 | 1.425587000  | 1.925853000  |
| F | -2.373712000 | 0.223880000  | 2.105686000  |
| F | -4.241257000 | 1.317498000  | 1.983554000  |
| F | -2.495291000 | 2.243855000  | 2.875764000  |
| F | 1.038646000  | 5.407039000  | -0.498606000 |
| F | -0.771765000 | 4.593748000  | -1.368685000 |
| F | 1.125636000  | 3.602181000  | -1.696897000 |
| H | -0.205255000 | 0.920288000  | -0.094532000 |
| C | -2.752752000 | -4.505003000 | -0.699489000 |
| H | -2.506616000 | -4.610575000 | 0.367191000  |
| H | -3.689480000 | -5.042729000 | -0.914085000 |
| H | -1.935693000 | -4.943491000 | -1.290938000 |
| C | -3.458446000 | -2.707619000 | -2.867487000 |
| H | -2.655035000 | -3.107799000 | -3.503052000 |
| H | -4.366845000 | -3.315743000 | -2.999916000 |
| H | -3.665079000 | -1.671582000 | -3.173296000 |
| C | -4.388644000 | -2.159008000 | -0.173062000 |
| H | -4.570154000 | -1.098847000 | -0.401745000 |
| H | -5.275832000 | -2.757005000 | -0.432956000 |
| H | -4.187566000 | -2.250486000 | 0.904483000  |

**6M:** E= - 1382. 636496

|    |              |              |              |
|----|--------------|--------------|--------------|
| C  | 0.216057000  | 3.029137000  | 0.918350000  |
| C  | 0.757569000  | 2.037253000  | 0.094859000  |
| C  | 0.520696000  | 2.032755000  | -1.295021000 |
| C  | -0.266712000 | 3.068823000  | -1.823000000 |
| C  | -0.813469000 | 4.063989000  | -1.008225000 |
| C  | -0.573907000 | 4.041732000  | 0.369010000  |
| C  | 1.082610000  | 0.954360000  | -2.206575000 |
| Au | -1.072033000 | -0.687110000 | -0.355331000 |
| P  | -2.860979000 | -0.550554000 | 1.127236000  |
| O  | 1.469831000  | 1.028599000  | 0.715114000  |
| C  | 2.805132000  | 0.808899000  | 0.343594000  |
| C  | 3.173437000  | -0.547519000 | -0.354310000 |
| C  | 2.100626000  | -1.636420000 | -0.440233000 |
| C  | 0.958658000  | -1.563549000 | -1.447281000 |
| C  | 0.456784000  | -2.936676000 | -1.849728000 |
| C  | 3.741796000  | 0.338268000  | 1.482194000  |
| O  | 4.075291000  | 0.762030000  | 2.565152000  |
| N  | 4.104396000  | -0.765713000 | 0.765766000  |
| C  | 5.122907000  | -1.761545000 | 0.992115000  |
| H  | 5.863227000  | -1.763976000 | 0.174623000  |

|   |              |              |              |
|---|--------------|--------------|--------------|
| H | 4.693744000  | -2.772913000 | 1.082288000  |
| H | 5.634722000  | -1.515118000 | 1.933159000  |
| H | 2.627387000  | -2.583945000 | -0.643152000 |
| H | 1.655827000  | -1.773499000 | 0.560652000  |
| H | 0.916509000  | 1.280066000  | -3.242948000 |
| H | 2.171763000  | 0.894865000  | -2.095856000 |
| H | 3.226729000  | 1.683345000  | -0.177313000 |
| H | 3.699437000  | -0.433770000 | -1.317675000 |
| H | -0.455820000 | 3.087887000  | -2.899820000 |
| H | -1.423265000 | 4.855335000  | -1.449922000 |
| H | -0.991000000 | 4.817133000  | 1.015995000  |
| H | 0.433098000  | 2.989843000  | 1.987704000  |
| H | -0.461319000 | -2.895278000 | -2.451398000 |
| H | 0.286637000  | -3.581507000 | -0.974261000 |
| H | 1.242273000  | -3.422313000 | -2.455380000 |
| C | 0.478633000  | -0.446416000 | -2.106512000 |
| H | -0.264340000 | -0.656375000 | -2.885939000 |
| C | -2.345604000 | -0.676510000 | 2.877631000  |
| H | -1.642129000 | 0.135370000  | 3.110945000  |
| H | -3.224550000 | -0.601091000 | 3.536125000  |
| H | -1.844767000 | -1.640860000 | 3.044209000  |
| C | -4.103922000 | -1.868108000 | 0.871927000  |
| H | -3.631824000 | -2.850049000 | 1.018832000  |
| H | -4.932160000 | -1.749122000 | 1.587314000  |
| H | -4.494346000 | -1.810844000 | -0.154248000 |
| C | -3.766583000 | 1.032045000  | 0.982391000  |
| H | -4.163127000 | 1.135901000  | -0.037758000 |
| H | -4.598058000 | 1.056192000  | 1.703477000  |
| H | -3.079324000 | 1.866559000  | 1.183322000  |

**7M:** E= -786.142182

|   |              |              |              |
|---|--------------|--------------|--------------|
| C | -2.396005000 | -1.579316000 | -0.946191000 |
| C | -1.518258000 | -0.708502000 | -0.289880000 |
| C | -1.998778000 | 0.261591000  | 0.615968000  |
| C | -3.385000000 | 0.303489000  | 0.839513000  |
| C | -4.268568000 | -0.562831000 | 0.189811000  |
| C | -3.770623000 | -1.505708000 | -0.713890000 |
| C | -1.084736000 | 1.277226000  | 1.287670000  |
| O | -0.185187000 | -0.826379000 | -0.621287000 |
| C | 0.769840000  | -0.976537000 | 0.393217000  |
| C | 1.788529000  | 0.193332000  | 0.632636000  |
| C | 1.755410000  | 1.355333000  | -0.355736000 |
| C | 0.625493000  | 2.369002000  | -0.339454000 |
| C | 0.898275000  | 3.529917000  | -1.270670000 |
| C | 2.011307000  | -1.814790000 | 0.001158000  |
| O | 2.211040000  | -2.937482000 | -0.409113000 |
| N | 2.846356000  | -0.791205000 | 0.337210000  |
| C | 4.283044000  | -0.712746000 | 0.410444000  |
| H | 4.617411000  | -0.467647000 | 1.432893000  |
| H | 4.686288000  | 0.045731000  | -0.280922000 |
| H | 4.692900000  | -1.693503000 | 0.129567000  |
| H | 2.704515000  | 1.911087000  | -0.243299000 |
| H | 1.795762000  | 0.930693000  | -1.376017000 |
| H | -1.677598000 | 1.799220000  | 2.054317000  |
| H | -0.280301000 | 0.775233000  | 1.837179000  |
| H | 0.315429000  | -1.352501000 | 1.324247000  |
| H | 1.834915000  | 0.549840000  | 1.675879000  |
| H | -3.777355000 | 1.047340000  | 1.539015000  |
| H | -5.341251000 | -0.497621000 | 0.387224000  |
| H | -4.447261000 | -2.190315000 | -1.231379000 |
| H | -1.972173000 | -2.311808000 | -1.636427000 |
| H | 0.056901000  | 4.236777000  | -1.305336000 |
| H | 1.091827000  | 3.174418000  | -2.298378000 |
| H | 1.801741000  | 4.084046000  | -0.959629000 |
| C | -0.541506000 | 2.315969000  | 0.328790000  |
| H | -1.243608000 | 3.135752000  | 0.133476000  |

Profile in Figure 1S (supplementary material)

1M-Au': E= -1957.230070

|    |              |              |              |
|----|--------------|--------------|--------------|
| C  | 1.935938000  | 2.582728000  | 0.030457000  |
| C  | 3.158169000  | 1.907410000  | -0.113105000 |
| C  | 4.331540000  | 2.625779000  | -0.380874000 |
| C  | 4.264774000  | 4.017557000  | -0.522544000 |
| C  | 3.051310000  | 4.696709000  | -0.390698000 |
| C  | 1.888003000  | 3.970362000  | -0.105487000 |
| C  | 1.604723000  | -1.531316000 | -2.982517000 |
| C  | 1.433508000  | -1.940049000 | -1.741454000 |
| Au | -0.240583000 | -1.053294000 | -0.515724000 |
| P  | -2.168765000 | 0.109866000  | 0.167130000  |
| C  | -3.523721000 | -1.042170000 | 0.606719000  |
| O  | 3.116116000  | 0.543851000  | 0.034414000  |
| C  | 4.207350000  | -0.232738000 | -0.385877000 |
| C  | 3.991163000  | -1.769339000 | -0.193570000 |
| C  | 2.680386000  | -2.256459000 | 0.431618000  |
| C  | 1.604470000  | -2.635400000 | -0.587250000 |
| C  | 0.929884000  | -3.976324000 | -0.375241000 |
| C  | 5.388948000  | -0.404934000 | 0.608975000  |
| O  | 6.243813000  | 0.312258000  | 1.081487000  |
| N  | 5.137327000  | -1.738716000 | 0.727501000  |
| C  | 5.891644000  | -2.798093000 | 1.352091000  |
| C  | -2.801228000 | 1.191339000  | -1.170532000 |
| C  | -1.879032000 | 1.177100000  | 1.627023000  |
| H  | 6.285333000  | -3.502756000 | 0.600028000  |
| H  | 5.279383000  | -3.359819000 | 2.075902000  |
| H  | 6.736094000  | -2.342595000 | 1.888054000  |
| H  | 2.893172000  | -3.162503000 | 1.019487000  |
| H  | 2.307982000  | -1.506278000 | 1.144215000  |
| H  | 1.013540000  | -0.730009000 | -3.432283000 |
| H  | 2.368598000  | -2.009424000 | -3.607444000 |
| H  | 5.295266000  | 2.119226000  | -0.434554000 |
| H  | 4.533411000  | 0.045908000  | -1.402322000 |
| H  | 4.214343000  | -2.346356000 | -1.107854000 |
| H  | 5.183441000  | 4.572964000  | -0.728357000 |
| H  | 3.011508000  | 5.782859000  | -0.499423000 |
| H  | 0.931937000  | 4.487238000  | 0.010281000  |
| H  | 1.036798000  | 2.005889000  | 0.255037000  |
| H  | 0.127551000  | -4.162776000 | -1.100030000 |
| H  | 0.530325000  | -4.065821000 | 0.646377000  |
| H  | 1.700523000  | -4.758218000 | -0.493451000 |
| C  | -4.372814000 | -0.794625000 | 1.697776000  |
| C  | -5.413109000 | -1.683157000 | 1.988013000  |
| C  | -5.612685000 | -2.816771000 | 1.194854000  |
| C  | -4.767990000 | -3.067286000 | 0.107260000  |
| C  | -3.724105000 | -2.187445000 | -0.185075000 |
| H  | -4.226273000 | 0.086618000  | 2.324954000  |
| H  | -6.068552000 | -1.486100000 | 2.839520000  |
| H  | -6.425314000 | -3.509557000 | 1.426167000  |
| H  | -4.918241000 | -3.954273000 | -0.512497000 |
| H  | -3.063218000 | -2.393639000 | -1.031384000 |
| C  | -2.428359000 | 2.466698000  | 1.716620000  |
| C  | -2.202482000 | 3.243542000  | 2.857527000  |
| C  | -1.432659000 | 2.740925000  | 3.910476000  |
| C  | -0.882812000 | 1.456681000  | 3.824348000  |
| C  | -1.100141000 | 0.677791000  | 2.686450000  |
| H  | -3.030863000 | 2.869830000  | 0.900471000  |
| H  | -2.630777000 | 4.246576000  | 2.920195000  |
| H  | -1.256017000 | 3.352231000  | 4.798634000  |
| H  | -0.276571000 | 1.062469000  | 4.643094000  |
| H  | -0.660209000 | -0.320954000 | 2.623309000  |
| C  | -4.175321000 | 1.294846000  | -1.441414000 |
| C  | -4.624918000 | 2.144603000  | -2.457266000 |
| C  | -3.711370000 | 2.893867000  | -3.204106000 |
| C  | -2.341129000 | 2.793567000  | -2.937077000 |

|   |              |             |              |
|---|--------------|-------------|--------------|
| C | -1.884842000 | 1.943455000 | -1.927900000 |
| H | -4.898185000 | 0.713909000 | -0.865706000 |
| H | -5.695076000 | 2.218028000 | -2.664239000 |
| H | -4.066192000 | 3.554708000 | -3.998572000 |
| H | -1.623241000 | 3.374880000 | -3.520240000 |
| H | -0.812215000 | 1.869022000 | -1.731119000 |

**TS1' : E= -1957.185058**

|    |              |              |              |
|----|--------------|--------------|--------------|
| C  | -2.636309000 | -2.324131000 | 1.373141000  |
| C  | -3.420831000 | -1.806145000 | 0.333565000  |
| C  | -3.029471000 | -1.995669000 | -1.035407000 |
| C  | -1.903617000 | -2.854546000 | -1.289631000 |
| C  | -1.139060000 | -3.358398000 | -0.263375000 |
| C  | -1.513091000 | -3.083937000 | 1.074462000  |
| C  | -2.456925000 | -0.138874000 | -1.677994000 |
| C  | -1.875300000 | 0.681102000  | -0.644119000 |
| Au | 0.178354000  | 0.436746000  | -0.320638000 |
| P  | 2.517929000  | 0.146708000  | 0.030556000  |
| C  | 3.371495000  | 1.728107000  | 0.421944000  |
| O  | -4.467122000 | -1.060717000 | 0.703013000  |
| C  | -5.372316000 | -0.531364000 | -0.238095000 |
| C  | -5.183075000 | 0.959656000  | -0.686114000 |
| C  | -4.151052000 | 1.818258000  | 0.047860000  |
| C  | -2.647172000 | 1.577566000  | 0.068055000  |
| C  | -2.001561000 | 2.515446000  | 1.057693000  |
| C  | -6.722568000 | -0.061658000 | 0.352693000  |
| O  | -7.611818000 | -0.577205000 | 0.987522000  |
| N  | -6.551928000 | 1.180334000  | -0.181211000 |
| C  | -7.437336000 | 2.315923000  | -0.272027000 |
| C  | 3.400842000  | -0.546900000 | -1.426790000 |
| C  | 2.906134000  | -0.990024000 | 1.422778000  |
| H  | -7.606041000 | 2.599415000  | -1.323920000 |
| H  | -7.037589000 | 3.188198000  | 0.270166000  |
| H  | -8.398651000 | 2.033474000  | 0.179459000  |
| H  | -4.288321000 | 2.854972000  | -0.313371000 |
| H  | -4.462937000 | 1.861607000  | 1.106146000  |
| H  | -1.780178000 | -0.547389000 | -2.429171000 |
| H  | -3.419935000 | 0.140213000  | -2.112435000 |
| H  | -3.806759000 | -1.987479000 | -1.802306000 |
| H  | -5.531604000 | -1.220004000 | -1.080142000 |
| H  | -5.127385000 | 1.085075000  | -1.779725000 |
| H  | -1.655375000 | -3.080185000 | -2.329406000 |
| H  | -0.266333000 | -3.979587000 | -0.470474000 |
| H  | -0.911160000 | -3.485461000 | 1.893282000  |
| H  | -2.934662000 | -2.124134000 | 2.403265000  |
| H  | -0.907875000 | 2.519105000  | 0.970781000  |
| H  | -2.263664000 | 2.208301000  | 2.086957000  |
| H  | -2.378162000 | 3.544842000  | 0.937376000  |
| C  | 4.354356000  | 1.829730000  | 1.419828000  |
| C  | 4.975342000  | 3.057786000  | 1.671957000  |
| C  | 4.624203000  | 4.190033000  | 0.931199000  |
| C  | 3.643934000  | 4.095824000  | -0.063269000 |
| C  | 3.015655000  | 2.873872000  | -0.313410000 |
| H  | 4.638967000  | 0.953658000  | 2.005774000  |
| H  | 5.737297000  | 3.126791000  | 2.452132000  |
| H  | 5.110756000  | 5.147856000  | 1.131114000  |
| H  | 3.361954000  | 4.978628000  | -0.642155000 |
| H  | 2.243258000  | 2.811533000  | -1.084769000 |
| C  | 4.032889000  | -1.829015000 | 1.413601000  |
| C  | 4.297160000  | -2.662900000 | 2.504788000  |
| C  | 3.442775000  | -2.665703000 | 3.611806000  |
| C  | 2.317870000  | -1.833635000 | 3.626571000  |
| C  | 2.046752000  | -1.003552000 | 2.535812000  |
| H  | 4.707157000  | -1.837064000 | 0.554730000  |
| H  | 5.175242000  | -3.313024000 | 2.487669000  |
| H  | 3.651309000  | -3.319239000 | 4.462412000  |
| H  | 1.645148000  | -1.834457000 | 4.487622000  |

|   |             |              |              |
|---|-------------|--------------|--------------|
| H | 1.159832000 | -0.364549000 | 2.547182000  |
| C | 4.636488000 | -0.047005000 | -1.868413000 |
| C | 5.269229000 | -0.616354000 | -2.978922000 |
| C | 4.677659000 | -1.687810000 | -3.653695000 |
| C | 3.445580000 | -2.190038000 | -3.219030000 |
| C | 2.806574000 | -1.620017000 | -2.115904000 |
| H | 5.109885000 | 0.788794000  | -1.349637000 |
| H | 6.229571000 | -0.218259000 | -3.315458000 |
| H | 5.173875000 | -2.130072000 | -4.521027000 |
| H | 2.977188000 | -3.025140000 | -3.745550000 |
| H | 1.839752000 | -2.012710000 | -1.789614000 |

**2M'** : E= -1957.193583

|    |              |              |              |
|----|--------------|--------------|--------------|
| C  | -3.273198000 | 2.666099000  | -1.290297000 |
| C  | -3.652118000 | 1.818366000  | -0.239116000 |
| C  | -2.819026000 | 1.688742000  | 0.994317000  |
| C  | -1.588926000 | 2.526469000  | 0.982262000  |
| C  | -1.266916000 | 3.362364000  | -0.042099000 |
| C  | -2.116809000 | 3.419456000  | -1.184834000 |
| C  | -2.502899000 | 0.204875000  | 1.439963000  |
| C  | -1.884734000 | -0.627275000 | 0.329910000  |
| Au | 0.182927000  | -0.389597000 | 0.151063000  |
| P  | 2.563389000  | -0.145777000 | 0.013363000  |
| C  | 3.287958000  | -0.914720000 | -1.493576000 |
| O  | -4.779687000 | 1.173275000  | -0.411862000 |
| C  | -5.414201000 | 0.358656000  | 0.571182000  |
| C  | -5.081892000 | -1.169271000 | 0.555106000  |
| C  | -4.119740000 | -1.698496000 | -0.505070000 |
| C  | -2.607876000 | -1.447566000 | -0.472362000 |
| C  | -1.953182000 | -2.259880000 | -1.572910000 |
| C  | -6.841980000 | -0.059529000 | 0.143753000  |
| O  | -7.864576000 | 0.527895000  | -0.120011000 |
| N  | -6.506296000 | -1.375082000 | 0.216557000  |
| C  | -7.303565000 | -2.573170000 | 0.116140000  |
| C  | 3.454679000  | -0.915659000 | 1.427433000  |
| C  | 3.119116000  | 1.609129000  | -0.025065000 |
| H  | -7.272839000 | -3.146255000 | 1.057647000  |
| H  | -6.957412000 | -3.221399000 | -0.704631000 |
| H  | -8.341785000 | -2.274790000 | -0.085485000 |
| H  | -4.262371000 | -2.794187000 | -0.526806000 |
| H  | -4.487250000 | -1.354380000 | -1.489717000 |
| H  | -1.803297000 | 0.311022000  | 2.280634000  |
| H  | -3.401010000 | -0.241011000 | 1.878042000  |
| H  | -3.439162000 | 2.104080000  | 1.822594000  |
| H  | -5.375170000 | 0.841203000  | 1.557897000  |
| H  | -4.843485000 | -1.564725000 | 1.555940000  |
| H  | -0.956916000 | 2.464136000  | 1.871129000  |
| H  | -0.364209000 | 3.973164000  | -0.006548000 |
| H  | -1.849982000 | 4.085340000  | -2.009841000 |
| H  | -3.915841000 | 2.723910000  | -2.169408000 |
| H  | -0.874738000 | -2.063352000 | -1.642288000 |
| H  | -2.408892000 | -2.036810000 | -2.554340000 |
| H  | -2.098307000 | -3.341897000 | -1.402694000 |
| C  | 4.332006000  | -0.316849000 | -2.218274000 |
| C  | 4.855494000  | -0.950550000 | -3.350218000 |
| C  | 4.344708000  | -2.183687000 | -3.766103000 |
| C  | 3.304573000  | -2.784867000 | -3.048407000 |
| C  | 2.774695000  | -2.152923000 | -1.920993000 |
| H  | 4.739651000  | 0.645910000  | -1.903800000 |
| H  | 5.666874000  | -0.476333000 | -3.907788000 |
| H  | 4.754400000  | -2.675598000 | -4.651726000 |
| H  | 2.898977000  | -3.746900000 | -3.370837000 |
| H  | 1.956938000  | -2.626069000 | -1.370854000 |
| C  | 4.149834000  | 2.096006000  | 0.794117000  |
| C  | 4.525537000  | 3.442534000  | 0.727741000  |
| C  | 3.881243000  | 4.310646000  | -0.157659000 |

|   |             |              |              |
|---|-------------|--------------|--------------|
| C | 2.852817000 | 3.831379000  | -0.978171000 |
| C | 2.468089000 | 2.490681000  | -0.907825000 |
| H | 4.663682000 | 1.427986000  | 1.487673000  |
| H | 5.327899000 | 3.811066000  | 1.371485000  |
| H | 4.178011000 | 5.361071000  | -0.208734000 |
| H | 2.346861000 | 4.505522000  | -1.673729000 |
| H | 1.657250000 | 2.126476000  | -1.544512000 |
| C | 4.716229000 | -1.516383000 | 1.279776000  |
| C | 5.359932000 | -2.081445000 | 2.385046000  |
| C | 4.753446000 | -2.050564000 | 3.644761000  |
| C | 3.496880000 | -1.455161000 | 3.798862000  |
| C | 2.847403000 | -0.895087000 | 2.695709000  |
| H | 5.199953000 | -1.548566000 | 0.301538000  |
| H | 6.339459000 | -2.549044000 | 2.258946000  |
| H | 5.257958000 | -2.495190000 | 4.506135000  |
| H | 3.015817000 | -1.433477000 | 4.779681000  |
| H | 1.859591000 | -0.443779000 | 2.820500000  |

**Profile in Figure 2S (supplementary material)**

**1M-B: E= -1382.606165**

|    |              |              |              |
|----|--------------|--------------|--------------|
| C  | -5.362186000 | -0.271767000 | 0.080812000  |
| N  | -4.985126000 | -1.569229000 | 0.271910000  |
| C  | -5.737369000 | -2.798643000 | 0.235122000  |
| C  | -1.113061000 | -1.551429000 | -0.009960000 |
| C  | -2.568798000 | -1.816349000 | -0.377316000 |
| C  | -0.392884000 | -0.846241000 | -0.856284000 |
| C  | 0.128749000  | -0.109928000 | -1.855993000 |
| C  | -1.789135000 | 2.005536000  | 1.268349000  |
| C  | -2.403020000 | 1.983505000  | 0.008092000  |
| O  | -3.324018000 | 1.050143000  | -0.386974000 |
| C  | -3.976711000 | 0.238553000  | 0.546335000  |
| C  | -3.589613000 | -1.284692000 | 0.636023000  |
| C  | -0.855791000 | 3.008700000  | 1.561781000  |
| C  | -0.521163000 | 3.978136000  | 0.613235000  |
| C  | -1.133091000 | 3.942221000  | -0.646975000 |
| C  | -2.069666000 | 2.954087000  | -0.950703000 |
| C  | -0.585492000 | -2.140219000 | 1.274648000  |
| O  | -6.399590000 | 0.237697000  | -0.276509000 |
| Au | 1.934198000  | -0.339887000 | -0.496705000 |
| P  | 4.056305000  | -0.293188000 | 0.493538000  |
| H  | -5.737696000 | -3.294250000 | 1.220657000  |
| H  | -5.333965000 | -3.501251000 | -0.512287000 |
| H  | -6.773290000 | -2.554092000 | -0.039255000 |
| H  | -2.694615000 | -2.911910000 | -0.442263000 |
| H  | -2.796390000 | -1.401519000 | -1.369068000 |
| H  | 0.472371000  | -0.585424000 | -2.783933000 |
| H  | -0.010142000 | 0.979329000  | -1.873060000 |
| H  | -2.020690000 | 1.252035000  | 2.022313000  |
| H  | -4.044503000 | 0.718072000  | 1.535235000  |
| H  | -3.349174000 | -1.620437000 | 1.658748000  |
| H  | -0.386810000 | 3.023518000  | 2.549084000  |
| H  | 0.205758000  | 4.757458000  | 0.852610000  |
| H  | -0.886307000 | 4.696434000  | -1.398564000 |
| H  | -2.566131000 | 2.919484000  | -1.922684000 |
| H  | 0.495683000  | -1.983172000 | 1.383284000  |
| H  | -0.791228000 | -3.222556000 | 1.304747000  |
| H  | -1.086691000 | -1.687638000 | 2.145296000  |
| C  | 4.028065000  | 0.210007000  | 2.251888000  |
| H  | 5.051909000  | 0.213180000  | 2.656180000  |
| H  | 3.594725000  | 1.216446000  | 2.340478000  |
| H  | 3.410981000  | -0.496185000 | 2.825539000  |
| C  | 5.181752000  | 0.879236000  | -0.346903000 |
| H  | 5.287986000  | 0.593723000  | -1.403350000 |
| H  | 4.762443000  | 1.894094000  | -0.292722000 |
| H  | 6.170022000  | 0.863994000  | 0.137731000  |
| C  | 4.901741000  | -1.914882000 | 0.453526000  |



|   |             |              |              |
|---|-------------|--------------|--------------|
| H | 5.897331000 | -1.829997000 | 0.915671000  |
| H | 4.304226000 | -2.654808000 | 1.005059000  |
| H | 5.008779000 | -2.248756000 | -0.588418000 |

**1M-C:** E= - 1382. 605160

|    |              |              |              |
|----|--------------|--------------|--------------|
| C  | 2.930518000  | 2.296498000  | -0.480981000 |
| N  | 1.665780000  | 2.336074000  | -0.986124000 |
| C  | 0.950113000  | 3.379222000  | -1.678749000 |
| C  | 0.021922000  | -1.189651000 | -0.839177000 |
| C  | 0.760041000  | 0.014967000  | -1.408632000 |
| C  | -0.986721000 | -1.756377000 | -1.551926000 |
| C  | -1.600063000 | -2.497261000 | -2.452450000 |
| C  | 5.399663000  | 0.492814000  | 0.923343000  |
| C  | 4.592613000  | -0.462332000 | 0.290859000  |
| O  | 3.346821000  | -0.187089000 | -0.216724000 |
| C  | 2.645338000  | 0.943545000  | 0.228380000  |
| C  | 1.211788000  | 1.070022000  | -0.392833000 |
| C  | 6.658290000  | 0.112384000  | 1.405572000  |
| C  | 7.119197000  | -1.197839000 | 1.255563000  |
| C  | 6.308895000  | -2.140047000 | 0.609131000  |
| C  | 5.049017000  | -1.779747000 | 0.130541000  |
| C  | 0.622050000  | -1.895137000 | 0.357289000  |
| O  | 3.863418000  | 3.066701000  | -0.549122000 |
| Au | -2.215452000 | -0.503835000 | -0.143880000 |
| P  | -3.968944000 | 0.530596000  | 1.023545000  |
| H  | 0.122363000  | 3.771538000  | -1.063701000 |
| H  | 0.540312000  | 3.022003000  | -2.637145000 |
| H  | 1.656112000  | 4.196158000  | -1.883645000 |
| H  | 0.135932000  | 0.497729000  | -2.173576000 |
| H  | 1.648767000  | -0.386045000 | -1.926002000 |
| H  | -1.005617000 | -3.125491000 | -3.126986000 |
| H  | -2.686784000 | -2.522327000 | -2.563957000 |
| H  | 5.075033000  | 1.531090000  | 1.000332000  |
| H  | 2.663992000  | 1.021723000  | 1.329129000  |
| H  | 0.429472000  | 1.234667000  | 0.369920000  |
| H  | 7.286580000  | 0.860971000  | 1.895129000  |
| H  | 8.104132000  | -1.483079000 | 1.632032000  |
| H  | 6.658096000  | -3.167679000 | 0.479532000  |
| H  | 4.407304000  | -2.506154000 | -0.372553000 |
| H  | 0.027908000  | -2.766873000 | 0.658613000  |
| H  | 0.731672000  | -1.219717000 | 1.218956000  |
| H  | 1.636011000  | -2.224756000 | 0.078240000  |
| C  | -5.025190000 | 1.556949000  | -0.060509000 |
| H  | -5.833502000 | 2.019310000  | 0.526482000  |
| H  | -4.415279000 | 2.343180000  | -0.528209000 |
| H  | -5.460921000 | 0.927413000  | -0.849450000 |
| C  | -3.373165000 | 1.643125000  | 2.348283000  |
| H  | -2.776748000 | 1.068415000  | 3.071081000  |
| H  | -2.743278000 | 2.430901000  | 1.911178000  |
| H  | -4.229343000 | 2.104435000  | 2.864153000  |
| C  | -5.088025000 | -0.665118000 | 1.837707000  |
| H  | -5.890381000 | -0.127529000 | 2.366144000  |
| H  | -5.528944000 | -1.330744000 | 1.081929000  |
| H  | -4.518056000 | -1.270615000 | 2.556865000  |

**TS1-B:** E= - 1382. 549912

|   |              |              |              |
|---|--------------|--------------|--------------|
| C | 5.367884000  | -0.396632000 | 0.100815000  |
| N | 4.945580000  | -1.678853000 | -0.096135000 |
| C | 5.652103000  | -2.936447000 | -0.071184000 |
| C | 1.106552000  | -1.591448000 | 0.712028000  |
| C | 2.611871000  | -1.792751000 | 0.788472000  |
| C | 0.396713000  | -0.461040000 | 0.541241000  |
| C | -0.845748000 | 0.036914000  | 1.030805000  |
| C | 1.307871000  | 0.911132000  | -0.642452000 |
| C | 2.146032000  | 1.458814000  | 0.390798000  |
| O | 3.358125000  | 0.966986000  | 0.674891000  |

|    |              |              |              |
|----|--------------|--------------|--------------|
| C  | 3.977441000  | 0.146681000  | -0.298373000 |
| C  | 3.532826000  | -1.344663000 | -0.350004000 |
| C  | 0.257665000  | 1.750992000  | -1.154416000 |
| C  | -0.124103000 | 2.877073000  | -0.468291000 |
| C  | 0.569983000  | 3.247279000  | 0.718597000  |
| C  | 1.699190000  | 2.564755000  | 1.138974000  |
| C  | 0.338926000  | -2.854616000 | 1.073612000  |
| O  | 6.429600000  | 0.086385000  | 0.415607000  |
| Au | -2.534755000 | -0.954897000 | 0.079415000  |
| P  | -4.434323000 | -1.952198000 | -0.869911000 |
| H  | 5.567560000  | -3.455833000 | -1.039850000 |
| H  | 5.272922000  | -3.601695000 | 0.721576000  |
| H  | 6.712029000  | -2.725170000 | 0.127917000  |
| H  | 2.781681000  | -2.871851000 | 0.915959000  |
| H  | 2.979682000  | -1.319699000 | 1.716807000  |
| H  | -0.943934000 | -0.077822000 | 2.121222000  |
| H  | -1.121945000 | 1.050988000  | 0.723738000  |
| H  | 1.740455000  | 0.211257000  | -1.353335000 |
| H  | 3.991081000  | 0.649607000  | -1.277820000 |
| H  | 3.176092000  | -1.692496000 | -1.334348000 |
| H  | -0.257670000 | 1.444374000  | -2.066813000 |
| H  | -0.947893000 | 3.497367000  | -0.826440000 |
| H  | 0.241790000  | 4.127006000  | 1.277444000  |
| H  | 2.295405000  | 2.906288000  | 1.986625000  |
| H  | -0.746748000 | -2.740469000 | 0.967926000  |
| H  | 0.555938000  | -3.130952000 | 2.120952000  |
| H  | 0.677523000  | -3.693036000 | 0.442038000  |
| C  | -5.020147000 | -1.134494000 | -2.403059000 |
| H  | -5.913926000 | -1.646726000 | -2.791747000 |
| H  | -5.265594000 | -0.084550000 | -2.187200000 |
| H  | -4.224424000 | -1.161767000 | -3.161537000 |
| C  | -5.887536000 | -1.950557000 | 0.248018000  |
| H  | -5.640308000 | -2.493350000 | 1.171871000  |
| H  | -6.148696000 | -0.914297000 | 0.507494000  |
| H  | -6.748121000 | -2.432846000 | -0.241013000 |
| C  | -4.196772000 | -3.710639000 | -1.332390000 |
| H  | -5.122576000 | -4.122636000 | -1.762954000 |
| H  | -3.384589000 | -3.789913000 | -2.069524000 |
| H  | -3.920428000 | -4.289835000 | -0.439367000 |

**TS1-C: E= -1382.557279**

|    |              |              |              |
|----|--------------|--------------|--------------|
| C  | -2.297207000 | 3.195906000  | -0.457027000 |
| N  | -1.580321000 | 3.017889000  | 0.689660000  |
| C  | -1.169321000 | 3.945051000  | 1.716350000  |
| C  | -1.554069000 | -0.876871000 | 1.237794000  |
| C  | -1.796209000 | 0.618821000  | 1.454393000  |
| C  | -0.141930000 | -1.350199000 | 1.329624000  |
| C  | 0.125448000  | -2.353013000 | 2.201924000  |
| C  | -1.913522000 | -1.083061000 | -0.798215000 |
| C  | -3.129740000 | -0.357883000 | -1.043300000 |
| O  | -3.193553000 | 0.973341000  | -1.029263000 |
| C  | -2.005345000 | 1.742163000  | -0.901389000 |
| C  | -1.227112000 | 1.611850000  | 0.442563000  |
| C  | -1.939656000 | -2.507990000 | -0.989731000 |
| C  | -3.116174000 | -3.172588000 | -1.235517000 |
| C  | -4.318941000 | -2.429539000 | -1.357119000 |
| C  | -4.334905000 | -1.045096000 | -1.263117000 |
| C  | -2.645000000 | -1.700373000 | 1.887968000  |
| O  | -2.890111000 | 4.138213000  | -0.924865000 |
| Au | 1.502780000  | -0.529776000 | 0.319250000  |
| P  | 3.447765000  | 0.291509000  | -0.758702000 |
| H  | -0.070907000 | 4.036533000  | 1.749336000  |
| H  | -1.528905000 | 3.633214000  | 2.709994000  |
| H  | -1.601444000 | 4.927139000  | 1.478938000  |
| H  | -1.349824000 | 0.832458000  | 2.442826000  |
| H  | -2.875026000 | 0.806232000  | 1.557578000  |
| H  | -0.634340000 | -2.858060000 | 2.809518000  |

|   |              |              |              |
|---|--------------|--------------|--------------|
| H | 1.151762000  | -2.690347000 | 2.375027000  |
| H | -0.967475000 | -0.582693000 | -1.015158000 |
| H | -1.393834000 | 1.659497000  | -1.813774000 |
| H | -0.143042000 | 1.465126000  | 0.305195000  |
| H | -0.999930000 | -3.054109000 | -0.882993000 |
| H | -3.134488000 | -4.258287000 | -1.341732000 |
| H | -5.257485000 | -2.957763000 | -1.543187000 |
| H | -5.253813000 | -0.471446000 | -1.391718000 |
| H | -2.525804000 | -2.777846000 | 1.731416000  |
| H | -3.643983000 | -1.396228000 | 1.548681000  |
| H | -2.607273000 | -1.503334000 | 2.973491000  |
| C | 3.772091000  | 2.075151000  | -0.468643000 |
| H | 4.698325000  | 2.389496000  | -0.973948000 |
| H | 2.929742000  | 2.668213000  | -0.853993000 |
| H | 3.866433000  | 2.259193000  | 0.611643000  |
| C | 3.443537000  | 0.117992000  | -2.586424000 |
| H | 3.335067000  | -0.943260000 | -2.854159000 |
| H | 2.593788000  | 0.675263000  | -3.007235000 |
| H | 4.380829000  | 0.507183000  | -3.013289000 |
| C | 4.987682000  | -0.550860000 | -0.222234000 |
| H | 5.860403000  | -0.136374000 | -0.750026000 |
| H | 5.119517000  | -0.417744000 | 0.861516000  |
| H | 4.909389000  | -1.626831000 | -0.436182000 |

**2M-B: E= -1382.560856**

|    |              |              |              |
|----|--------------|--------------|--------------|
| C  | -5.577142000 | -0.464570000 | 0.607545000  |
| N  | -5.016602000 | -1.707284000 | 0.603480000  |
| C  | -5.600093000 | -3.026535000 | 0.573814000  |
| C  | -1.527912000 | -0.971138000 | -1.041720000 |
| C  | -2.898963000 | -1.526122000 | -0.705088000 |
| C  | -0.918721000 | 0.180955000  | -0.628211000 |
| C  | 0.306063000  | 0.712055000  | -1.275070000 |
| C  | -1.492171000 | 1.035580000  | 0.602218000  |
| C  | -2.633680000 | 1.720950000  | -0.064968000 |
| O  | -3.826625000 | 1.171552000  | -0.148481000 |
| C  | -4.186262000 | 0.176644000  | 0.813273000  |
| C  | -3.613041000 | -1.249720000 | 0.617904000  |
| C  | -0.466937000 | 1.972738000  | 1.148823000  |
| C  | -0.408669000 | 3.261976000  | 0.729522000  |
| C  | -1.360735000 | 3.740560000  | -0.234185000 |
| C  | -2.450099000 | 2.993406000  | -0.639761000 |
| C  | -0.819536000 | -1.792504000 | -2.102285000 |
| O  | -6.713215000 | -0.062702000 | 0.531960000  |
| Au | 2.104730000  | 0.039391000  | -0.339875000 |
| P  | 4.143423000  | -0.695910000 | 0.622360000  |
| H  | -5.294909000 | -3.612461000 | 1.456112000  |
| H  | -5.309627000 | -3.577093000 | -0.335584000 |
| H  | -6.693154000 | -2.914167000 | 0.581608000  |
| H  | -2.843888000 | -2.622212000 | -0.799309000 |
| H  | -3.584097000 | -1.207662000 | -1.516368000 |
| H  | 0.355427000  | 0.419504000  | -2.332596000 |
| H  | 0.361504000  | 1.806763000  | -1.238182000 |
| H  | -1.806188000 | 0.339843000  | 1.386356000  |
| H  | -4.063394000 | 0.585396000  | 1.827080000  |
| H  | -3.044885000 | -1.633406000 | 1.481955000  |
| H  | 0.248886000  | 1.574420000  | 1.870009000  |
| H  | 0.357142000  | 3.943057000  | 1.104012000  |
| H  | -1.259070000 | 4.762545000  | -0.608901000 |
| H  | -3.231283000 | 3.412352000  | -1.275798000 |
| H  | 0.248379000  | -1.924148000 | -1.864709000 |
| H  | -0.863744000 | -1.297979000 | -3.089177000 |
| H  | -1.275252000 | -2.786090000 | -2.212186000 |
| C  | 5.182586000  | 0.655738000  | 1.305830000  |
| H  | 6.119708000  | 0.255704000  | 1.723379000  |
| H  | 5.417432000  | 1.374994000  | 0.507502000  |
| H  | 4.626490000  | 1.180055000  | 2.096850000  |
| C  | 5.246072000  | -1.563741000 | -0.562174000 |

|   |             |              |              |
|---|-------------|--------------|--------------|
| H | 4.728602000 | -2.447341000 | -0.963807000 |
| H | 5.487295000 | -0.889653000 | -1.397207000 |
| H | 6.177815000 | -1.879586000 | -0.067893000 |
| C | 3.956074000 | -1.874944000 | 2.018434000  |
| H | 4.940964000 | -2.186974000 | 2.399435000  |
| H | 3.387690000 | -1.395714000 | 2.829067000  |
| H | 3.401057000 | -2.761135000 | 1.677451000  |

**2M-C: E= -1382.562262**

|    |              |              |              |
|----|--------------|--------------|--------------|
| C  | -2.649493000 | 2.965422000  | -0.643519000 |
| N  | -2.055248000 | 2.955072000  | 0.581555000  |
| C  | -1.946120000 | 3.967887000  | 1.603811000  |
| C  | -1.555876000 | -0.904954000 | 1.156285000  |
| C  | -1.988367000 | 0.565495000  | 1.424427000  |
| C  | -0.074565000 | -1.115596000 | 1.536758000  |
| C  | 0.234072000  | -1.791584000 | 2.660843000  |
| C  | -1.682920000 | -1.246082000 | -0.446148000 |
| C  | -2.900762000 | -0.688237000 | -1.085016000 |
| O  | -3.093876000 | 0.601140000  | -1.215490000 |
| C  | -2.063529000 | 1.567698000  | -0.966840000 |
| C  | -1.455003000 | 1.613595000  | 0.460288000  |
| C  | -1.509491000 | -2.704629000 | -0.643323000 |
| C  | -2.465491000 | -3.486334000 | -1.211494000 |
| C  | -3.685294000 | -2.887157000 | -1.655320000 |
| C  | -3.910236000 | -1.523648000 | -1.591729000 |
| C  | -2.539385000 | -1.800146000 | 1.934710000  |
| O  | -3.334867000 | 3.767047000  | -1.231551000 |
| Au | 1.511744000  | -0.368567000 | 0.395995000  |
| P  | 3.403422000  | 0.410954000  | -0.819719000 |
| H  | -0.895175000 | 4.265316000  | 1.755076000  |
| H  | -2.355967000 | 3.614660000  | 2.563440000  |
| H  | -2.521006000 | 4.845221000  | 1.276465000  |
| H  | -1.663819000 | 0.810542000  | 2.447375000  |
| H  | -3.088741000 | 0.628691000  | 1.423651000  |
| H  | -0.508638000 | -2.249803000 | 3.325099000  |
| H  | 1.273739000  | -1.909288000 | 2.982909000  |
| H  | -0.789256000 | -0.735778000 | -0.863657000 |
| H  | -1.349633000 | 1.546872000  | -1.803955000 |
| H  | -0.353190000 | 1.640796000  | 0.456791000  |
| H  | -0.582434000 | -3.135726000 | -0.258459000 |
| H  | -2.323440000 | -4.562205000 | -1.321851000 |
| H  | -4.460190000 | -3.526043000 | -2.087499000 |
| H  | -4.819693000 | -1.071491000 | -1.989204000 |
| H  | -2.248107000 | -2.858679000 | 1.913220000  |
| H  | -3.560503000 | -1.712296000 | 1.533770000  |
| H  | -2.579284000 | -1.483197000 | 2.987043000  |
| C  | 3.726461000  | 2.212022000  | -0.654817000 |
| H  | 4.622515000  | 2.502052000  | -1.224906000 |
| H  | 2.859506000  | 2.776322000  | -1.028888000 |
| H  | 3.874922000  | 2.461415000  | 0.406176000  |
| C  | 3.323665000  | 0.126354000  | -2.632615000 |
| H  | 3.207073000  | -0.949739000 | -2.828302000 |
| H  | 2.454869000  | 0.655102000  | -3.051236000 |
| H  | 4.240419000  | 0.487789000  | -3.123824000 |
| C  | 4.978768000  | -0.382318000 | -0.308672000 |
| H  | 5.820737000  | 0.008588000  | -0.900532000 |
| H  | 5.159674000  | -0.184446000 | 0.758018000  |
| H  | 4.904595000  | -1.469904000 | -0.454835000 |

**3M-C: E= -3208.795330**

|   |             |              |              |
|---|-------------|--------------|--------------|
| C | 3.554261000 | -2.372149000 | 2.261484000  |
| N | 4.292391000 | -1.471670000 | 1.553635000  |
| C | 5.635335000 | -0.978255000 | 1.734653000  |
| C | 2.215690000 | -1.271312000 | -1.783086000 |
| C | 3.436162000 | -1.447902000 | -0.831088000 |
| C | 2.009484000 | 0.220074000  | -2.123460000 |

|    |              |              |              |
|----|--------------|--------------|--------------|
| C  | 2.224987000  | 0.655483000  | -3.380787000 |
| C  | 0.847307000  | -1.785914000 | -1.042516000 |
| C  | 1.026887000  | -3.078238000 | -0.330731000 |
| O  | 1.793682000  | -3.190027000 | 0.725348000  |
| C  | 2.297289000  | -2.040257000 | 1.423997000  |
| C  | 3.215780000  | -1.075597000 | 0.627200000  |
| C  | -0.268171000 | -1.785333000 | -2.019629000 |
| C  | -0.918218000 | -2.923484000 | -2.384839000 |
| C  | -0.552523000 | -4.162474000 | -1.778927000 |
| C  | 0.395670000  | -4.251008000 | -0.773887000 |
| C  | 2.486698000  | -2.162800000 | -3.010591000 |
| O  | 3.806904000  | -3.104304000 | 3.189797000  |
| Au | 1.441876000  | 1.657462000  | -0.712126000 |
| P  | 0.857305000  | 3.434209000  | 0.761015000  |
| H  | 6.086491000  | -1.519610000 | 2.577984000  |
| H  | 5.633864000  | 0.100715000  | 1.963022000  |
| H  | 6.250617000  | -1.147697000 | 0.836353000  |
| H  | 4.256946000  | -0.841529000 | -1.245100000 |
| H  | 3.776419000  | -2.495782000 | -0.864319000 |
| H  | 2.506364000  | 0.005504000  | -4.218388000 |
| H  | 2.129316000  | 1.715980000  | -3.635313000 |
| H  | 1.460363000  | -1.582459000 | 1.971159000  |
| H  | 2.925741000  | -0.017636000 | 0.737082000  |
| H  | -0.526656000 | -0.820395000 | -2.459901000 |
| H  | -1.721869000 | -2.900893000 | -3.121382000 |
| H  | -1.066543000 | -5.075108000 | -2.093342000 |
| H  | 0.614106000  | -5.193142000 | -0.269789000 |
| H  | 1.726067000  | -2.042064000 | -3.793080000 |
| H  | 2.524875000  | -3.226119000 | -2.729008000 |
| H  | 3.463676000  | -1.908442000 | -3.447423000 |
| C  | 1.014328000  | 3.061848000  | 2.551893000  |
| H  | 0.775766000  | 3.952771000  | 3.153773000  |
| H  | 0.312974000  | 2.252032000  | 2.798528000  |
| H  | 2.041788000  | 2.737604000  | 2.774067000  |
| C  | -0.852188000 | 4.073019000  | 0.572098000  |
| H  | -0.995319000 | 4.421195000  | -0.461419000 |
| H  | -1.570209000 | 3.265624000  | 0.773654000  |
| H  | -1.029672000 | 4.909375000  | 1.266543000  |
| C  | 1.918756000  | 4.915575000  | 0.510694000  |
| H  | 1.633595000  | 5.722183000  | 1.204080000  |
| H  | 2.972049000  | 4.646176000  | 0.678733000  |
| H  | 1.811145000  | 5.272061000  | -0.524416000 |
| H  | 0.634943000  | -0.999647000 | -0.294035000 |
| N  | -2.124812000 | -0.410961000 | 0.094890000  |
| S  | -2.933168000 | 0.704652000  | -0.753428000 |
| O  | -2.163278000 | 1.100407000  | -1.940683000 |
| O  | -3.614523000 | 1.744631000  | 0.028302000  |
| S  | -1.786983000 | -0.329837000 | 1.659464000  |
| O  | -1.611857000 | 1.020483000  | 2.212204000  |
| O  | -0.760071000 | -1.344387000 | 1.946020000  |
| C  | -4.314945000 | -0.358662000 | -1.451477000 |
| F  | -5.002199000 | -0.932775000 | -0.466599000 |
| F  | -5.134866000 | 0.414981000  | -2.158646000 |
| F  | -3.824720000 | -1.307905000 | -2.247439000 |
| C  | -3.314532000 | -0.997246000 | 2.526559000  |
| F  | -3.077502000 | -1.069792000 | 3.834747000  |
| F  | -4.354855000 | -0.194814000 | 2.317446000  |
| F  | -3.605907000 | -2.212874000 | 2.071061000  |

**TS2-C:** E= -3208.774412

|   |             |              |              |
|---|-------------|--------------|--------------|
| C | 3.076136000 | -2.867616000 | 2.122307000  |
| N | 3.872343000 | -2.031988000 | 1.397806000  |
| C | 5.280503000 | -1.736124000 | 1.477681000  |
| C | 1.615509000 | -1.620820000 | -1.805670000 |
| C | 2.849654000 | -1.919790000 | -0.900663000 |
| C | 1.597971000 | -0.123130000 | -2.181270000 |
| C | 1.696111000 | 0.255875000  | -3.471924000 |

|    |              |              |              |
|----|--------------|--------------|--------------|
| C  | 0.221305000  | -2.092918000 | -1.204421000 |
| C  | 0.131196000  | -3.111921000 | -0.172535000 |
| O  | 1.057039000  | -3.345576000 | 0.768094000  |
| C  | 1.816533000  | -2.329096000 | 1.408647000  |
| C  | 2.792301000  | -1.489642000 | 0.549804000  |
| C  | -0.834281000 | -2.130250000 | -2.199349000 |
| C  | -1.913774000 | -2.980410000 | -2.128844000 |
| C  | -1.980038000 | -3.909449000 | -1.072110000 |
| C  | -0.983568000 | -3.966357000 | -0.109279000 |
| C  | 1.848729000  | -2.548816000 | -3.033948000 |
| O  | 3.304999000  | -3.672949000 | 2.997593000  |
| Au | 1.544147000  | 1.428383000  | -0.781374000 |
| P  | 1.577904000  | 3.308637000  | 0.680285000  |
| H  | 5.716003000  | -2.358162000 | 2.272555000  |
| H  | 5.451577000  | -0.674373000 | 1.723297000  |
| H  | 5.796201000  | -1.963983000 | 0.530287000  |
| H  | 3.716688000  | -1.447156000 | -1.388547000 |
| H  | 3.041606000  | -3.004647000 | -0.908861000 |
| H  | 1.754406000  | -0.443051000 | -4.315449000 |
| H  | 1.717620000  | 1.313519000  | -3.754357000 |
| H  | 1.151938000  | -1.749542000 | 2.060395000  |
| H  | 2.664830000  | -0.400200000 | 0.659680000  |
| H  | -0.769753000 | -1.388976000 | -2.996827000 |
| H  | -2.703886000 | -2.937870000 | -2.879400000 |
| H  | -2.831417000 | -4.591077000 | -0.999259000 |
| H  | -1.027642000 | -4.680298000 | 0.714208000  |
| H  | 1.110710000  | -2.399337000 | -3.832087000 |
| H  | 1.798159000  | -3.604457000 | -2.725047000 |
| H  | 2.846830000  | -2.370938000 | -3.461867000 |
| C  | 1.986136000  | 2.923590000  | 2.429990000  |
| H  | 2.008513000  | 3.842461000  | 3.036549000  |
| H  | 1.221684000  | 2.238996000  | 2.823630000  |
| H  | 2.969124000  | 2.432079000  | 2.479559000  |
| C  | 0.010573000  | 4.257625000  | 0.781310000  |
| H  | -0.236745000 | 4.651550000  | -0.215551000 |
| H  | -0.796465000 | 3.581838000  | 1.095822000  |
| H  | 0.106156000  | 5.093995000  | 1.491429000  |
| C  | 2.829981000  | 4.567627000  | 0.197705000  |
| H  | 2.830657000  | 5.411914000  | 0.904802000  |
| H  | 3.828488000  | 4.106276000  | 0.181114000  |
| H  | 2.601788000  | 4.940291000  | -0.811858000 |
| H  | -0.592042000 | -1.159170000 | -0.551697000 |
| N  | -1.621000000 | -0.299760000 | 0.090093000  |
| S  | -2.315861000 | 0.884759000  | -0.844695000 |
| O  | -1.698765000 | 0.852514000  | -2.166663000 |
| O  | -2.508783000 | 2.140952000  | -0.121680000 |
| S  | -1.477950000 | -0.155356000 | 1.734986000  |
| O  | -0.872466000 | 1.096456000  | 2.187666000  |
| O  | -0.938250000 | -1.438060000 | 2.193127000  |
| C  | -4.076692000 | 0.252206000  | -1.177259000 |
| F  | -4.886654000 | 0.604762000  | -0.186808000 |
| F  | -4.492342000 | 0.819234000  | -2.302416000 |
| F  | -4.101068000 | -1.067565000 | -1.314232000 |
| C  | -3.228444000 | -0.146922000 | 2.455237000  |
| F  | -3.113775000 | -0.436874000 | 3.744393000  |
| F  | -3.797707000 | 1.040004000  | 2.319830000  |
| F  | -3.970105000 | -1.073830000 | 1.858594000  |

**4M-C:** E= -1382.180042

|   |              |              |              |
|---|--------------|--------------|--------------|
| C | -3.270620000 | -2.128072000 | 1.097310000  |
| N | -2.891304000 | -2.438494000 | -0.173909000 |
| C | -3.252956000 | -3.530002000 | -1.041551000 |
| C | -1.522515000 | 1.066620000  | -1.344482000 |
| C | -2.352597000 | -0.255254000 | -1.340312000 |
| C | -0.095083000 | 0.762070000  | -1.870418000 |
| C | 0.236239000  | 1.008176000  | -3.153877000 |
| C | -1.423198000 | 1.772968000  | 0.031072000  |

|    |              |              |              |
|----|--------------|--------------|--------------|
| C  | -2.104063000 | 1.414110000  | 1.214335000  |
| O  | -2.927024000 | 0.305566000  | 1.306625000  |
| C  | -2.287393000 | -0.934679000 | 1.136955000  |
| C  | -1.944151000 | -1.317267000 | -0.332801000 |
| C  | -0.631652000 | 2.938263000  | 0.100051000  |
| C  | -0.531602000 | 3.719528000  | 1.250924000  |
| C  | -1.233349000 | 3.349199000  | 2.402974000  |
| C  | -2.008607000 | 2.192513000  | 2.378487000  |
| C  | -2.311423000 | 2.030667000  | -2.271882000 |
| O  | -4.062766000 | -2.633126000 | 1.864566000  |
| Au | 1.362037000  | -0.015538000 | -0.596667000 |
| P  | 3.085553000  | -0.854131000 | 0.815568000  |
| H  | -3.978513000 | -4.163602000 | -0.511460000 |
| H  | -2.372215000 | -4.141025000 | -1.303339000 |
| H  | -3.716909000 | -3.169539000 | -1.974707000 |
| H  | -2.292500000 | -0.674373000 | -2.357437000 |
| H  | -3.410791000 | -0.011402000 | -1.156758000 |
| H  | -0.450886000 | 1.455228000  | -3.884274000 |
| H  | 1.229720000  | 0.765239000  | -3.545622000 |
| H  | -1.454846000 | -1.060330000 | 1.851033000  |
| H  | -0.907386000 | -1.658188000 | -0.484252000 |
| H  | -0.079138000 | 3.239164000  | -0.792906000 |
| H  | 0.091545000  | 4.617378000  | 1.246273000  |
| H  | -1.170563000 | 3.949628000  | 3.313992000  |
| H  | -2.563846000 | 1.859278000  | 3.258062000  |
| H  | -1.769160000 | 2.972002000  | -2.439809000 |
| H  | -3.286486000 | 2.273593000  | -1.821646000 |
| H  | -2.505013000 | 1.569326000  | -3.252386000 |
| C  | 2.524535000  | -1.387054000 | 2.483814000  |
| H  | 3.371336000  | -1.752632000 | 3.085401000  |
| H  | 2.052203000  | -0.537568000 | 2.998888000  |
| H  | 1.779836000  | -2.190055000 | 2.380189000  |
| C  | 4.424704000  | 0.356316000  | 1.165534000  |
| H  | 4.888744000  | 0.670354000  | 0.218910000  |
| H  | 3.995376000  | 1.243348000  | 1.654215000  |
| H  | 5.193310000  | -0.084550000 | 1.819448000  |
| C  | 3.978173000  | -2.321658000 | 0.159679000  |
| H  | 4.761906000  | -2.649802000 | 0.860211000  |
| H  | 3.263836000  | -3.142990000 | 0.001378000  |
| H  | 4.437018000  | -2.067725000 | -0.807244000 |

**5M-C: E= -3208.858007**

|    |             |              |              |
|----|-------------|--------------|--------------|
| C  | 5.971702000 | -0.403218000 | -0.614807000 |
| N  | 5.274189000 | -0.284730000 | -1.781307000 |
| C  | 5.707341000 | -0.054389000 | -3.136688000 |
| C  | 1.885546000 | -1.971572000 | -0.716759000 |
| C  | 3.172198000 | -1.672727000 | -1.527962000 |
| C  | 0.711584000 | -1.066668000 | -1.094026000 |
| C  | 0.626243000 | -0.153111000 | -2.113835000 |
| C  | 2.058835000 | -1.987554000 | 0.829140000  |
| C  | 3.290383000 | -1.882687000 | 1.516353000  |
| O  | 4.504039000 | -1.707228000 | 0.878974000  |
| C  | 4.659889000 | -0.488640000 | 0.200245000  |
| C  | 3.936400000 | -0.402409000 | -1.175762000 |
| C  | 0.915181000 | -2.208037000 | 1.627724000  |
| C  | 0.980541000 | -2.321989000 | 3.017143000  |
| C  | 2.212269000 | -2.222582000 | 3.669504000  |
| C  | 3.359214000 | -1.999716000 | 2.912278000  |
| C  | 1.415776000 | -3.395819000 | -1.153334000 |
| O  | 7.156281000 | -0.412218000 | -0.363383000 |
| Au | 0.764942000 | 1.180038000  | -0.235087000 |
| P  | 0.829941000 | 2.974592000  | 1.262674000  |
| H  | 6.805058000 | 0.004669000  | -3.137986000 |
| H  | 5.300511000 | 0.892717000  | -3.529868000 |
| H  | 5.399284000 | -0.874186000 | -3.806224000 |
| H  | 2.905945000 | -1.661090000 | -2.596794000 |
| H  | 3.860711000 | -2.519620000 | -1.395253000 |

|   |              |              |              |
|---|--------------|--------------|--------------|
| H | 1.473414000  | 0.087020000  | -2.761345000 |
| H | -0.359657000 | 0.208502000  | -2.426703000 |
| H | 4.488411000  | 0.373292000  | 0.867902000  |
| H | 3.336303000  | 0.512427000  | -1.313186000 |
| H | -0.062874000 | -2.318957000 | 1.156138000  |
| H | 0.064306000  | -2.499254000 | 3.585226000  |
| H | 2.280408000  | -2.316398000 | 4.756003000  |
| H | 4.343236000  | -1.914904000 | 3.378011000  |
| H | 0.446020000  | -3.654889000 | -0.707330000 |
| H | 2.159659000  | -4.142834000 | -0.837809000 |
| H | 1.313844000  | -3.445843000 | -2.248645000 |
| C | -0.029034000 | 2.611581000  | 2.837806000  |
| H | 0.020519000  | 3.487025000  | 3.503326000  |
| H | -1.080043000 | 2.368310000  | 2.627365000  |
| H | 0.445115000  | 1.749349000  | 3.328058000  |
| C | 0.017142000  | 4.470246000  | 0.592163000  |
| H | 0.527950000  | 4.787049000  | -0.328252000 |
| H | -1.029467000 | 4.233040000  | 0.355906000  |
| H | 0.053795000  | 5.283971000  | 1.332784000  |
| C | 2.525475000  | 3.488101000  | 1.721112000  |
| H | 2.488159000  | 4.347127000  | 2.408370000  |
| H | 3.043122000  | 2.650657000  | 2.210823000  |
| H | 3.080353000  | 3.769072000  | 0.814438000  |
| H | -0.235754000 | -1.339170000 | -0.619011000 |
| N | -2.692192000 | -0.502842000 | -0.537273000 |
| S | -3.137870000 | -2.051168000 | -0.531968000 |
| O | -2.047774000 | -2.818233000 | 0.092701000  |
| O | -3.730165000 | -2.549741000 | -1.774733000 |
| S | -3.411167000 | 0.660698000  | -1.398355000 |
| O | -4.698850000 | 0.319222000  | -2.010865000 |
| O | -2.418293000 | 1.390845000  | -2.201579000 |
| C | -4.520006000 | -2.148432000 | 0.736967000  |
| F | -5.582299000 | -1.462248000 | 0.323584000  |
| F | -4.866873000 | -3.422718000 | 0.908930000  |
| F | -4.111214000 | -1.651482000 | 1.902908000  |
| C | -3.843942000 | 1.867464000  | -0.023350000 |
| F | -4.476946000 | 2.913005000  | -0.547539000 |
| F | -4.631790000 | 1.286826000  | 0.876684000  |
| F | -2.739278000 | 2.305878000  | 0.595284000  |

**TS3-C:** E= -3208.803465

|    |             |              |              |
|----|-------------|--------------|--------------|
| C  | 5.657038000 | -0.667221000 | -0.274747000 |
| N  | 5.085788000 | -0.640396000 | -1.512069000 |
| C  | 5.662034000 | -0.569442000 | -2.830887000 |
| C  | 1.488475000 | -1.996223000 | -0.653460000 |
| C  | 2.888350000 | -1.888262000 | -1.330930000 |
| C  | 0.525452000 | -0.912679000 | -1.252470000 |
| C  | 0.354555000 | -0.862387000 | -2.596315000 |
| C  | 1.537346000 | -1.900384000 | 0.895137000  |
| C  | 2.697590000 | -1.801771000 | 1.698036000  |
| O  | 3.981104000 | -1.734706000 | 1.186101000  |
| C  | 4.269307000 | -0.603799000 | 0.405302000  |
| C  | 3.688560000 | -0.629610000 | -1.038343000 |
| C  | 0.314940000 | -1.994351000 | 1.592467000  |
| C  | 0.229310000 | -2.000608000 | 2.984292000  |
| C  | 1.394643000 | -1.911168000 | 3.751251000  |
| C  | 2.620595000 | -1.807445000 | 3.099734000  |
| C  | 0.976042000 | -3.420390000 | -1.008802000 |
| O  | 6.810176000 | -0.704939000 | 0.097117000  |
| Au | 0.625945000 | 1.008582000  | -0.236163000 |
| P  | 1.039636000 | 3.064494000  | 0.804077000  |
| H  | 6.756211000 | -0.548118000 | -2.725536000 |
| H  | 5.338326000 | 0.344020000  | -3.358211000 |
| H  | 5.385344000 | -1.443469000 | -3.443505000 |
| H  | 2.746999000 | -1.984478000 | -2.417919000 |
| H  | 3.494888000 | -2.752555000 | -1.021081000 |
| H  | 0.830605000 | -1.560300000 | -3.299323000 |



|   |              |              |              |
|---|--------------|--------------|--------------|
| H | -0.324627000 | -0.132082000 | -3.046328000 |
| H | 4.086841000  | 0.330755000  | 0.962962000  |
| H | 3.151040000  | 0.286477000  | -1.334154000 |
| H | -0.605088000 | -2.091425000 | 1.019304000  |
| H | -0.748970000 | -2.084108000 | 3.463646000  |
| H | 1.350358000  | -1.919190000 | 4.843127000  |
| H | 3.557270000  | -1.731611000 | 3.656135000  |
| H | -0.043567000 | -3.587704000 | -0.646335000 |
| H | 1.639301000  | -4.181563000 | -0.568458000 |
| H | 0.975201000  | -3.565149000 | -2.100725000 |
| C | 0.142210000  | 3.300191000  | 2.385613000  |
| H | 0.358310000  | 4.294174000  | 2.806486000  |
| H | -0.937326000 | 3.200702000  | 2.209964000  |
| H | 0.455227000  | 2.523583000  | 3.098615000  |
| C | 0.585471000  | 4.512658000  | -0.224981000 |
| H | 1.157666000  | 4.486944000  | -1.163692000 |
| H | -0.485591000 | 4.465643000  | -0.465372000 |
| H | 0.803001000  | 5.448832000  | 0.312253000  |
| C | 2.802245000  | 3.335098000  | 1.232749000  |
| H | 2.935150000  | 4.326132000  | 1.693275000  |
| H | 3.130556000  | 2.560075000  | 1.940270000  |
| H | 3.417700000  | 3.270357000  | 0.323834000  |
| H | -0.945659000 | -0.702511000 | -0.896094000 |
| N | -2.265801000 | -0.616403000 | -0.845892000 |
| S | -3.153970000 | -2.022380000 | -0.715216000 |
| O | -2.200844000 | -3.088474000 | -0.420467000 |
| O | -4.155524000 | -2.191470000 | -1.757600000 |
| S | -2.939174000 | 0.810369000  | -1.394398000 |
| O | -4.292853000 | 0.640288000  | -1.905823000 |
| O | -1.922034000 | 1.512057000  | -2.174792000 |
| C | -4.122052000 | -1.784493000 | 0.885775000  |
| F | -4.851654000 | -0.672981000 | 0.814754000  |
| F | -4.921432000 | -2.827443000 | 1.048761000  |
| F | -3.289783000 | -1.694871000 | 1.916195000  |
| C | -3.148646000 | 1.857619000  | 0.202092000  |
| F | -2.529782000 | 3.021760000  | 0.030052000  |
| F | -4.436316000 | 2.074553000  | 0.407541000  |
| F | -2.628141000 | 1.243086000  | 1.259004000  |

**6M-C:** E= -1382.627501

|    |              |              |              |
|----|--------------|--------------|--------------|
| C  | -3.253089000 | -1.921230000 | 1.414962000  |
| N  | -2.850781000 | -2.420446000 | 0.209658000  |
| C  | -3.175011000 | -3.646388000 | -0.476736000 |
| C  | -1.605410000 | 0.885243000  | -1.512160000 |
| C  | -2.385309000 | -0.434731000 | -1.283326000 |
| C  | -0.221898000 | 0.660596000  | -2.126563000 |
| C  | 0.302155000  | -0.496065000 | -2.644365000 |
| C  | -1.499586000 | 1.817826000  | -0.271031000 |
| C  | -2.169104000 | 1.620490000  | 0.959590000  |
| O  | -2.965288000 | 0.524668000  | 1.224347000  |
| C  | -2.299999000 | -0.711058000 | 1.268165000  |
| C  | -1.939052000 | -1.313247000 | -0.120891000 |
| C  | -0.763142000 | 3.015580000  | -0.390810000 |
| C  | -0.686787000 | 3.963972000  | 0.629137000  |
| C  | -1.365187000 | 3.745220000  | 1.830805000  |
| C  | -2.098456000 | 2.572287000  | 1.987317000  |
| C  | -2.388063000 | 1.662855000  | -2.618150000 |
| O  | -4.036845000 | -2.316990000 | 2.247556000  |
| Au | 1.486311000  | -0.252286000 | -0.677027000 |
| P  | 3.024555000  | -0.480031000 | 1.072876000  |
| H  | -3.887918000 | -4.206063000 | 0.145136000  |
| H  | -2.276178000 | -4.266887000 | -0.631448000 |
| H  | -3.642068000 | -3.452051000 | -1.456184000 |
| H  | -2.362382000 | -1.013891000 | -2.219564000 |
| H  | -3.440252000 | -0.176650000 | -1.114806000 |
| H  | -0.222769000 | -1.453332000 | -2.597761000 |
| H  | 1.164134000  | -0.446978000 | -3.317127000 |

|   |              |              |              |
|---|--------------|--------------|--------------|
| H | -1.472486000 | -0.699598000 | 1.998267000  |
| H | -0.891581000 | -1.647687000 | -0.208322000 |
| H | -0.243924000 | 3.237091000  | -1.324787000 |
| H | -0.106080000 | 4.876403000  | 0.476578000  |
| H | -1.323715000 | 4.479340000  | 2.638733000  |
| H | -2.644696000 | 2.360203000  | 2.908599000  |
| H | -1.877863000 | 2.592588000  | -2.906149000 |
| H | -3.387173000 | 1.925919000  | -2.240317000 |
| H | -2.506462000 | 1.040224000  | -3.518166000 |
| C | 2.984552000  | 0.923462000  | 2.244710000  |
| H | 3.742197000  | 0.774786000  | 3.029484000  |
| H | 3.193113000  | 1.858652000  | 1.705970000  |
| H | 1.988698000  | 0.991619000  | 2.705540000  |
| C | 4.745314000  | -0.576506000 | 0.460169000  |
| H | 4.847994000  | -1.440214000 | -0.212416000 |
| H | 4.987711000  | 0.339604000  | -0.097370000 |
| H | 5.440417000  | -0.685411000 | 1.306805000  |
| C | 2.762485000  | -1.983431000 | 2.081111000  |
| H | 3.518845000  | -2.035378000 | 2.879261000  |
| H | 1.759488000  | -1.956107000 | 2.530576000  |
| H | 2.843505000  | -2.874723000 | 1.442694000  |
| H | 0.318619000  | 1.582054000  | -2.365661000 |

**7M-C:** E= -786.130732

|   |              |              |              |
|---|--------------|--------------|--------------|
| C | -2.595588000 | -1.400333000 | -0.127326000 |
| N | -2.876066000 | -0.066843000 | -0.088119000 |
| C | -4.108132000 | 0.646021000  | 0.135795000  |
| C | 0.730961000  | 1.393648000  | 0.392159000  |
| C | -0.765683000 | 1.113352000  | 0.678976000  |
| C | 0.908575000  | 2.384653000  | -0.762588000 |
| C | 0.018909000  | 3.267361000  | -1.228158000 |
| C | 1.581748000  | 0.120593000  | 0.114355000  |
| C | 1.121177000  | -1.216169000 | 0.143264000  |
| O | -0.191600000 | -1.567308000 | 0.392849000  |
| C | -1.133964000 | -1.115333000 | -0.545770000 |
| C | -1.516188000 | 0.388934000  | -0.429759000 |
| C | 2.962714000  | 0.288964000  | -0.122373000 |
| C | 3.840428000  | -0.778490000 | -0.309254000 |
| C | 3.356540000  | -2.088703000 | -0.262355000 |
| C | 1.998190000  | -2.296127000 | -0.040773000 |
| C | 1.302769000  | 2.068469000  | 1.674463000  |
| O | -3.268651000 | -2.387481000 | 0.076210000  |
| H | -4.902036000 | -0.092284000 | 0.318313000  |
| H | -4.383353000 | 1.252855000  | -0.743596000 |
| H | -4.039192000 | 1.311032000  | 1.012634000  |
| H | -1.259829000 | 2.074561000  | 0.890917000  |
| H | -0.845921000 | 0.517161000  | 1.599895000  |
| H | -1.000918000 | 3.352474000  | -0.843221000 |
| H | 0.292331000  | 3.958502000  | -2.030459000 |
| H | -0.882917000 | -1.452375000 | -1.566292000 |
| H | -1.483349000 | 0.940349000  | -1.382128000 |
| H | 3.376702000  | 1.298898000  | -0.144679000 |
| H | 4.901186000  | -0.583459000 | -0.483808000 |
| H | 4.027610000  | -2.939660000 | -0.401845000 |
| H | 1.573876000  | -3.301580000 | -0.002137000 |
| H | 2.344919000  | 2.390893000  | 1.539207000  |
| H | 1.269453000  | 1.367944000  | 2.523897000  |
| H | 0.706005000  | 2.957780000  | 1.929401000  |
| H | 1.905165000  | 2.392093000  | -1.215675000 |

**Profile in Figure 3S (supplementary material)**

**8M:** E= -731.988494

|   |             |              |             |
|---|-------------|--------------|-------------|
| C | 4.384494000 | -0.862969000 | 0.132935000 |
| C | 3.682584000 | -0.222359000 | 1.155570000 |
| C | 2.362116000 | 0.207261000  | 0.967500000 |

|   |              |              |              |
|---|--------------|--------------|--------------|
| C | 1.729678000  | -0.013653000 | -0.267386000 |
| C | 2.437086000  | -0.655547000 | -1.301388000 |
| C | 3.750197000  | -1.075106000 | -1.099239000 |
| O | 0.452295000  | 0.348594000  | -0.558590000 |
| C | -0.370884000 | 0.965107000  | 0.428598000  |
| C | -1.827375000 | 0.965740000  | -0.082228000 |
| O | -1.932442000 | 2.159309000  | -0.848074000 |
| C | -1.254791000 | 3.171184000  | -0.120290000 |
| C | -0.067525000 | 2.474281000  | 0.585519000  |
| C | -2.271853000 | -0.206366000 | -0.941684000 |
| C | -2.434326000 | -1.541873000 | -0.239426000 |
| C | -2.349324000 | -1.694886000 | 1.065252000  |
| C | -2.264874000 | -1.871160000 | 2.363194000  |
| C | -2.732344000 | -2.717097000 | -1.147975000 |
| H | -2.479122000 | 1.040010000  | 0.813302000  |
| H | -0.946294000 | 3.955644000  | -0.826799000 |
| H | -1.935783000 | 3.626948000  | 0.625014000  |
| H | 0.891229000  | 2.710203000  | 0.103612000  |
| H | 0.006614000  | 2.767631000  | 1.642668000  |
| H | 1.844157000  | 0.712319000  | 1.782757000  |
| H | 1.931114000  | -0.816813000 | -2.255845000 |
| H | 4.163366000  | -0.045055000 | 2.121419000  |
| H | 4.284516000  | -1.574176000 | -1.912126000 |
| H | 5.414169000  | -1.192338000 | 0.289730000  |
| H | -3.239254000 | 0.067207000  | -1.400002000 |
| H | -1.560827000 | -0.322954000 | -1.774883000 |
| H | -3.639040000 | -2.521120000 | -1.746368000 |
| H | -1.904416000 | -2.872120000 | -1.861147000 |
| H | -2.882756000 | -3.646620000 | -0.581875000 |
| H | -3.142170000 | -1.779028000 | 3.015863000  |
| H | -1.312678000 | -2.117698000 | 2.849731000  |
| H | -0.288809000 | 0.409403000  | 1.374549000  |

**8M-Au:** E= - 1328. 487264

|   |              |              |              |
|---|--------------|--------------|--------------|
| C | 2.839460000  | -2.203854000 | 0.089213000  |
| O | 3.966984000  | -2.984197000 | 0.453175000  |
| C | 4.921708000  | -2.817167000 | -0.583310000 |
| C | 4.821694000  | -1.338082000 | -1.005850000 |
| C | 3.426273000  | -0.894878000 | -0.498563000 |
| H | 2.291826000  | -2.712206000 | -0.731350000 |
| H | 5.909560000  | -3.097639000 | -0.191285000 |
| H | 4.682639000  | -3.484888000 | -1.434210000 |
| H | 5.589186000  | -0.729561000 | -0.507511000 |
| H | 4.936993000  | -1.209324000 | -2.091348000 |
| O | 3.500468000  | 0.076399000  | 0.539482000  |
| C | 3.742528000  | 1.384549000  | 0.248080000  |
| C | 4.003736000  | 1.879566000  | -1.039678000 |
| C | 3.719106000  | 2.271088000  | 1.340559000  |
| C | 4.227905000  | 3.251110000  | -1.220723000 |
| H | 4.045467000  | 1.213911000  | -1.901591000 |
| C | 3.946172000  | 3.631878000  | 1.144348000  |
| H | 3.519894000  | 1.867815000  | 2.335862000  |
| C | 4.200626000  | 4.133765000  | -0.139673000 |
| H | 4.432029000  | 3.625073000  | -2.227538000 |
| H | 3.924405000  | 4.308230000  | 2.002954000  |
| H | 4.379698000  | 5.200553000  | -0.291457000 |
| C | 1.947339000  | -2.074374000 | 1.314348000  |
| H | 1.782583000  | -3.088132000 | 1.718980000  |
| H | 2.491418000  | -1.512956000 | 2.087819000  |
| C | 0.584579000  | -1.425129000 | 1.131019000  |
| C | -0.108850000 | -1.023207000 | 2.410449000  |
| H | -0.162740000 | -1.888026000 | 3.091628000  |
| H | 0.479462000  | -0.242579000 | 2.919960000  |
| H | -1.124783000 | -0.643385000 | 2.238871000  |
| C | 0.064591000  | -1.267457000 | -0.067787000 |
| C | -0.281888000 | -1.196859000 | -1.368279000 |
| H | -0.704022000 | -2.069179000 | -1.884527000 |

|    |              |              |              |
|----|--------------|--------------|--------------|
| H  | 0.069809000  | -0.370615000 | -2.000374000 |
| H  | 2.785339000  | -0.511429000 | -1.307987000 |
| Au | -2.122974000 | -0.283480000 | -0.393877000 |
| P  | -4.184836000 | 0.682527000  | 0.144119000  |
| C  | -4.456889000 | 2.283307000  | -0.697848000 |
| H  | -4.429883000 | 2.136024000  | -1.786934000 |
| H  | -5.433320000 | 2.701590000  | -0.408868000 |
| H  | -3.659531000 | 2.985099000  | -0.413793000 |
| C  | -5.606527000 | -0.376885000 | -0.305612000 |
| H  | -6.548528000 | 0.117277000  | -0.022301000 |
| H  | -5.600094000 | -0.559602000 | -1.389714000 |
| H  | -5.526843000 | -1.340382000 | 0.218118000  |
| C  | -4.359326000 | 1.023842000  | 1.933230000  |
| H  | -5.345025000 | 1.471137000  | 2.133464000  |
| H  | -4.261313000 | 0.086666000  | 2.499491000  |
| H  | -3.569791000 | 1.718614000  | 2.253372000  |

**TS4: E= -1328.432735**

|    |              |              |              |
|----|--------------|--------------|--------------|
| C  | 2.544071000  | -2.284191000 | -0.133018000 |
| O  | 3.757941000  | -3.009260000 | -0.031001000 |
| C  | 4.495272000  | -2.693774000 | -1.221053000 |
| C  | 4.203536000  | -1.194176000 | -1.530068000 |
| C  | 3.110404000  | -0.927037000 | -0.523400000 |
| H  | 1.958239000  | -2.667753000 | -0.990770000 |
| H  | 5.558962000  | -2.873163000 | -1.020961000 |
| H  | 4.167891000  | -3.341198000 | -2.052064000 |
| H  | 5.066921000  | -0.542134000 | -1.341347000 |
| H  | 3.875385000  | -1.033061000 | -2.566841000 |
| O  | 3.186003000  | -0.022790000 | 0.410018000  |
| C  | 3.885694000  | 1.189517000  | 0.311773000  |
| C  | 3.953778000  | 1.914866000  | -0.878350000 |
| C  | 4.449535000  | 1.651042000  | 1.501703000  |
| C  | 4.633045000  | 3.137662000  | -0.869313000 |
| H  | 3.475046000  | 1.555802000  | -1.790250000 |
| C  | 5.125829000  | 2.871884000  | 1.489666000  |
| H  | 4.356400000  | 1.054233000  | 2.410441000  |
| C  | 5.220163000  | 3.614669000  | 0.306410000  |
| H  | 4.693965000  | 3.720639000  | -1.790716000 |
| H  | 5.578995000  | 3.244287000  | 2.410856000  |
| H  | 5.746937000  | 4.571233000  | 0.303150000  |
| C  | 1.692976000  | -2.315333000 | 1.112516000  |
| H  | 1.567435000  | -3.375714000 | 1.389918000  |
| H  | 2.240191000  | -1.850279000 | 1.951117000  |
| C  | 0.305973000  | -1.684237000 | 0.975069000  |
| C  | -0.580577000 | -2.095245000 | 2.132008000  |
| H  | -0.733475000 | -3.189365000 | 2.141443000  |
| H  | -0.107759000 | -1.839608000 | 3.097214000  |
| H  | -1.564179000 | -1.607763000 | 2.093422000  |
| C  | -0.120139000 | -0.859850000 | -0.009129000 |
| C  | 0.594945000  | -0.348352000 | -1.206122000 |
| H  | 0.274798000  | -0.810104000 | -2.155512000 |
| H  | 0.553123000  | 0.747600000  | -1.306068000 |
| H  | 1.758351000  | -0.536728000 | -1.222281000 |
| Au | -2.084823000 | -0.088872000 | -0.070230000 |
| P  | -4.294010000 | 0.771241000  | -0.128396000 |
| C  | -4.383473000 | 2.595617000  | -0.314227000 |
| H  | -3.892840000 | 2.891627000  | -1.253035000 |
| H  | -5.430674000 | 2.935576000  | -0.327474000 |
| H  | -3.854955000 | 3.073883000  | 0.523367000  |
| C  | -5.325374000 | 0.118466000  | -1.499987000 |
| H  | -6.336711000 | 0.552753000  | -1.465643000 |
| H  | -4.854095000 | 0.366118000  | -2.462425000 |
| H  | -5.395262000 | -0.975845000 | -1.415124000 |
| C  | -5.266954000 | 0.413296000  | 1.386724000  |
| H  | -6.283637000 | 0.827361000  | 1.303252000  |
| H  | -5.328372000 | -0.675124000 | 1.532734000  |
| H  | -4.763259000 | 0.856459000  | 2.258378000  |

**9M:** E= - 1328. 456595

|    |              |              |              |
|----|--------------|--------------|--------------|
| C  | 3.134339000  | -2.132254000 | -0.520313000 |
| O  | 4.275512000  | -2.904403000 | -0.203478000 |
| C  | 5.440134000  | -2.092999000 | -0.333074000 |
| C  | 4.986464000  | -0.694353000 | 0.130983000  |
| C  | 3.566095000  | -0.730186000 | -0.280779000 |
| H  | 2.877223000  | -2.204563000 | -1.600362000 |
| H  | 6.234707000  | -2.517231000 | 0.292722000  |
| H  | 5.785792000  | -2.058254000 | -1.382335000 |
| H  | 5.021571000  | -0.619495000 | 1.235341000  |
| H  | 5.533627000  | 0.168583000  | -0.276836000 |
| O  | 2.767022000  | 0.234300000  | -0.476596000 |
| C  | 3.108559000  | 1.604108000  | -0.254393000 |
| C  | 3.089759000  | 2.436048000  | -1.368221000 |
| C  | 3.357406000  | 2.051702000  | 1.038700000  |
| C  | 3.373390000  | 3.790604000  | -1.172339000 |
| H  | 2.863702000  | 2.031761000  | -2.356000000 |
| C  | 3.633025000  | 3.412300000  | 1.211309000  |
| H  | 3.314711000  | 1.372786000  | 1.891858000  |
| C  | 3.645701000  | 4.276341000  | 0.111671000  |
| H  | 3.376162000  | 4.466982000  | -2.029508000 |
| H  | 3.830437000  | 3.794120000  | 2.214979000  |
| H  | 3.861383000  | 5.336852000  | 0.256950000  |
| C  | 1.912441000  | -2.611324000 | 0.323311000  |
| H  | 1.895324000  | -3.698555000 | 0.137446000  |
| H  | 2.178257000  | -2.476447000 | 1.378995000  |
| C  | 0.581286000  | -1.993065000 | -0.046156000 |
| C  | 0.064725000  | -2.456691000 | -1.391195000 |
| H  | 0.756434000  | -2.197197000 | -2.215312000 |
| H  | -0.048839000 | -3.555573000 | -1.420712000 |
| H  | -0.909068000 | -2.002936000 | -1.623758000 |
| C  | -0.103326000 | -1.130465000 | 0.754406000  |
| C  | 0.405584000  | -0.669952000 | 2.104674000  |
| H  | 0.446954000  | 0.432242000  | 2.146771000  |
| H  | -0.294318000 | -0.969061000 | 2.904699000  |
| H  | 1.402612000  | -1.046761000 | 2.390010000  |
| Au | -1.959931000 | -0.332059000 | 0.237493000  |
| P  | -4.079301000 | 0.622090000  | -0.292558000 |
| C  | -5.173821000 | 0.895566000  | 1.158946000  |
| H  | -4.672739000 | 1.565391000  | 1.873185000  |
| H  | -6.131240000 | 1.343142000  | 0.849539000  |
| H  | -5.365226000 | -0.065824000 | 1.658060000  |
| C  | -3.989390000 | 2.272427000  | -1.098272000 |
| H  | -4.997826000 | 2.660735000  | -1.309601000 |
| H  | -3.460570000 | 2.974404000  | -0.436753000 |
| H  | -3.426697000 | 2.189360000  | -2.039890000 |
| C  | -5.108164000 | -0.377544000 | -1.442681000 |
| H  | -6.072652000 | 0.116941000  | -1.637178000 |
| H  | -4.570867000 | -0.512193000 | -2.393123000 |
| H  | -5.290269000 | -1.368626000 | -1.001616000 |

**TS5:** E= - 1328. 408347

|   |             |              |              |
|---|-------------|--------------|--------------|
| C | 3.067483000 | -1.858081000 | -0.118957000 |
| O | 4.360531000 | -1.386292000 | -0.419424000 |
| C | 4.172113000 | -0.676145000 | -1.669656000 |
| C | 2.641282000 | -0.284050000 | -1.804467000 |
| C | 2.225280000 | -0.626068000 | -0.393538000 |
| H | 2.795772000 | -2.609670000 | -0.872793000 |
| H | 4.810372000 | 0.217413000  | -1.646043000 |
| H | 4.472441000 | -1.317505000 | -2.513283000 |
| H | 2.502243000 | 0.765810000  | -2.081962000 |
| H | 2.135317000 | -0.918578000 | -2.542811000 |
| O | 2.370786000 | 0.342201000  | 0.528420000  |
| C | 2.167995000 | 1.702279000  | 0.304900000  |

|    |              |              |              |
|----|--------------|--------------|--------------|
| C  | 1.072470000  | 2.195100000  | -0.407787000 |
| C  | 3.099175000  | 2.559382000  | 0.896733000  |
| C  | 0.923927000  | 3.580727000  | -0.538129000 |
| H  | 0.340130000  | 1.510827000  | -0.840291000 |
| C  | 2.932542000  | 3.939721000  | 0.763513000  |
| H  | 3.939368000  | 2.134322000  | 1.448755000  |
| C  | 1.847541000  | 4.454015000  | 0.044217000  |
| H  | 0.072651000  | 3.975970000  | -1.097391000 |
| H  | 3.658176000  | 4.615354000  | 1.222210000  |
| H  | 1.721387000  | 5.533857000  | -0.060136000 |
| C  | 2.625401000  | -2.388174000 | 1.237903000  |
| H  | 2.714124000  | -3.483061000 | 1.317751000  |
| H  | 3.178613000  | -1.943042000 | 2.076771000  |
| C  | 1.174629000  | -1.901216000 | 1.256782000  |
| C  | 0.737247000  | -1.284242000 | 2.535844000  |
| H  | 1.068084000  | -1.904072000 | 3.386079000  |
| H  | 1.255922000  | -0.312336000 | 2.647751000  |
| H  | -0.344950000 | -1.113144000 | 2.579792000  |
| C  | 0.425925000  | -1.777170000 | 0.061627000  |
| C  | 0.452901000  | -2.868019000 | -1.010262000 |
| H  | 1.214234000  | -3.650511000 | -0.868986000 |
| H  | -0.524702000 | -3.374462000 | -0.985037000 |
| H  | 0.550804000  | -2.453306000 | -2.025360000 |
| Au | -1.345874000 | -0.643345000 | -0.003313000 |
| P  | -3.379591000 | 0.570439000  | -0.132767000 |
| C  | -3.244162000 | 2.197978000  | -0.971529000 |
| H  | -2.873897000 | 2.051383000  | -1.996760000 |
| H  | -4.224177000 | 2.698507000  | -1.007148000 |
| H  | -2.530070000 | 2.832390000  | -0.426633000 |
| C  | -4.710881000 | -0.301534000 | -1.047604000 |
| H  | -5.628519000 | 0.306543000  | -1.067175000 |
| H  | -4.380319000 | -0.494844000 | -2.078705000 |
| H  | -4.921848000 | -1.264586000 | -0.560441000 |
| C  | -4.118589000 | 0.956166000  | 1.502782000  |
| H  | -5.061336000 | 1.512123000  | 1.383140000  |
| H  | -4.314485000 | 0.020146000  | 2.046218000  |
| H  | -3.411658000 | 1.560839000  | 2.089561000  |

**TS5' : E= -1328.398119**

|   |              |              |              |
|---|--------------|--------------|--------------|
| C | -2.118930000 | -2.388166000 | 0.536051000  |
| O | -3.286334000 | -2.477353000 | 1.311695000  |
| C | -3.036480000 | -1.525253000 | 2.380986000  |
| C | -1.908443000 | -0.518387000 | 1.907508000  |
| C | -1.906187000 | -0.888292000 | 0.438157000  |
| H | -1.280172000 | -2.762446000 | 1.155450000  |
| H | -3.978252000 | -0.994861000 | 2.575929000  |
| H | -2.720851000 | -2.061860000 | 3.289675000  |
| H | -2.170414000 | 0.522129000  | 2.123870000  |
| H | -0.943976000 | -0.749896000 | 2.376961000  |
| O | -2.828313000 | -0.279819000 | -0.325547000 |
| C | -3.158595000 | 1.069092000  | -0.234030000 |
| C | -2.221850000 | 2.066704000  | 0.051608000  |
| C | -4.494245000 | 1.380212000  | -0.500922000 |
| C | -2.646047000 | 3.399120000  | 0.084255000  |
| H | -1.175811000 | 1.813136000  | 0.233655000  |
| C | -4.901084000 | 2.715991000  | -0.467782000 |
| H | -5.194076000 | 0.573634000  | -0.726380000 |
| C | -3.980816000 | 3.728044000  | -0.172510000 |
| H | -1.920077000 | 4.184738000  | 0.306014000  |
| H | -5.944939000 | 2.964532000  | -0.672729000 |
| H | -4.302081000 | 4.771562000  | -0.147664000 |
| C | -1.902302000 | -2.974931000 | -0.859931000 |
| H | -1.950027000 | -4.070494000 | -0.890488000 |
| H | -2.582948000 | -2.536978000 | -1.600827000 |
| C | -0.476244000 | -2.433045000 | -0.894866000 |
| C | 0.596086000  | -3.393908000 | -0.528480000 |
| H | 0.237838000  | -4.249801000 | 0.063409000  |

|    |              |              |              |
|----|--------------|--------------|--------------|
| H  | 0.964764000  | -3.810125000 | -1.489072000 |
| H  | 1.451655000  | -2.900824000 | -0.046858000 |
| C  | -0.261221000 | -1.032703000 | -0.992089000 |
| C  | -0.902297000 | -0.318731000 | -2.181408000 |
| H  | -1.037667000 | 0.753614000  | -1.995910000 |
| H  | -0.188062000 | -0.403243000 | -3.017372000 |
| H  | -1.858627000 | -0.742072000 | -2.519461000 |
| Au | 1.506563000  | -0.134293000 | -0.302103000 |
| P  | 3.483804000  | 0.938045000  | 0.451914000  |
| C  | 3.545676000  | 1.258684000  | 2.258782000  |
| H  | 3.453373000  | 0.307777000  | 2.803802000  |
| H  | 4.494122000  | 1.745406000  | 2.534487000  |
| H  | 2.706431000  | 1.909771000  | 2.544137000  |
| C  | 5.013244000  | -0.015466000 | 0.101320000  |
| H  | 5.901127000  | 0.526920000  | 0.461211000  |
| H  | 4.958389000  | -0.994516000 | 0.599454000  |
| H  | 5.100685000  | -0.178790000 | -0.982859000 |
| C  | 3.779949000  | 2.578386000  | -0.317212000 |
| H  | 4.710521000  | 3.025869000  | 0.064625000  |
| H  | 3.853600000  | 2.461641000  | -1.408361000 |
| H  | 2.935786000  | 3.246910000  | -0.093090000 |

**10M: E= -1328.498708**

|    |              |              |              |
|----|--------------|--------------|--------------|
| C  | -2.807326000 | -1.542079000 | -0.740047000 |
| O  | -3.791293000 | -0.873951000 | -1.469322000 |
| C  | -4.472110000 | -0.049681000 | -0.494162000 |
| C  | -3.576955000 | 0.013894000  | 0.792756000  |
| C  | -2.248066000 | -0.496576000 | 0.232647000  |
| H  | -3.276695000 | -2.324511000 | -0.105174000 |
| H  | -4.623878000 | 0.943951000  | -0.941140000 |
| H  | -5.459717000 | -0.482686000 | -0.263779000 |
| H  | -3.537948000 | 1.025171000  | 1.215175000  |
| H  | -3.952023000 | -0.664683000 | 1.571707000  |
| O  | -1.652097000 | 0.525406000  | -0.595483000 |
| C  | -1.419515000 | 1.805909000  | -0.167719000 |
| C  | -1.156474000 | 2.165146000  | 1.162796000  |
| C  | -1.393290000 | 2.787575000  | -1.171640000 |
| C  | -0.873567000 | 3.500580000  | 1.476343000  |
| H  | -1.174690000 | 1.418759000  | 1.956411000  |
| C  | -1.100743000 | 4.112809000  | -0.847523000 |
| H  | -1.606520000 | 2.487434000  | -2.199641000 |
| C  | -0.839927000 | 4.478744000  | 0.479193000  |
| H  | -0.675912000 | 3.771163000  | 2.516717000  |
| H  | -1.083755000 | 4.867359000  | -1.638111000 |
| H  | -0.617430000 | 5.517688000  | 0.732438000  |
| C  | -1.562613000 | -2.196100000 | -1.333249000 |
| H  | -1.738733000 | -3.185040000 | -1.779611000 |
| H  | -1.076686000 | -1.557298000 | -2.084269000 |
| C  | -0.757687000 | -2.318591000 | -0.020397000 |
| C  | -0.006547000 | -3.592017000 | 0.255935000  |
| H  | -0.739702000 | -4.416629000 | 0.317534000  |
| H  | 0.681058000  | -3.839197000 | -0.566739000 |
| H  | 0.560014000  | -3.568412000 | 1.196106000  |
| C  | -1.169590000 | -1.369174000 | 0.920874000  |
| C  | -1.005327000 | -1.449778000 | 2.413876000  |
| H  | -1.944325000 | -1.829937000 | 2.853592000  |
| H  | -0.197849000 | -2.130798000 | 2.713092000  |
| H  | -0.814134000 | -0.467115000 | 2.868363000  |
| Au | 0.968929000  | -0.672087000 | 0.070257000  |
| P  | 3.016530000  | 0.383651000  | -0.284755000 |
| C  | 2.836326000  | 2.105201000  | -0.874104000 |
| H  | 2.278577000  | 2.691115000  | -0.129465000 |
| H  | 3.827817000  | 2.557094000  | -1.030949000 |
| H  | 2.275866000  | 2.111170000  | -1.819713000 |
| C  | 4.047539000  | 0.471952000  | 1.223642000  |
| H  | 5.004110000  | 0.967879000  | 0.997200000  |
| H  | 3.515882000  | 1.040203000  | 2.000279000  |

|   |             |              |              |
|---|-------------|--------------|--------------|
| H | 4.241373000 | -0.544236000 | 1.595499000  |
| C | 4.035021000 | -0.477393000 | -1.536775000 |
| H | 4.990911000 | 0.051532000  | -1.672317000 |
| H | 4.229982000 | -1.507468000 | -1.205500000 |
| H | 3.493260000 | -0.506588000 | -2.492914000 |

**10M'** : E= -1328.501607

|    |              |              |              |
|----|--------------|--------------|--------------|
| C  | -0.895181000 | 1.690493000  | 0.587433000  |
| O  | -1.768226000 | 2.728260000  | 0.250285000  |
| C  | -2.114761000 | 2.481116000  | -1.132324000 |
| C  | -1.709582000 | 1.004791000  | -1.471739000 |
| C  | -1.515104000 | 0.443234000  | -0.065012000 |
| H  | 0.086572000  | 1.865759000  | 0.096485000  |
| H  | -3.196323000 | 2.649201000  | -1.242902000 |
| H  | -1.583357000 | 3.194286000  | -1.784763000 |
| H  | -2.471715000 | 0.501563000  | -2.077185000 |
| H  | -0.758998000 | 0.966727000  | -2.022041000 |
| O  | -2.790924000 | 0.262743000  | 0.599994000  |
| C  | -3.941759000 | -0.184691000 | 0.010822000  |
| C  | -4.001983000 | -1.192063000 | -0.964906000 |
| C  | -5.132485000 | 0.385128000  | 0.491738000  |
| C  | -5.245518000 | -1.612101000 | -1.452399000 |
| H  | -3.092168000 | -1.655409000 | -1.345174000 |
| C  | -6.366302000 | -0.051002000 | 0.007311000  |
| H  | -5.063629000 | 1.170081000  | 1.247651000  |
| C  | -6.430871000 | -1.050739000 | -0.970989000 |
| H  | -5.279759000 | -2.395479000 | -2.213925000 |
| H  | -7.284253000 | 0.399975000  | 0.393025000  |
| H  | -7.396682000 | -1.388077000 | -1.353870000 |
| C  | -0.598870000 | 1.236842000  | 2.007897000  |
| H  | 0.170399000  | 1.818527000  | 2.535188000  |
| H  | -1.511812000 | 1.222957000  | 2.625094000  |
| C  | -0.183442000 | -0.216588000 | 1.749697000  |
| C  | 0.310025000  | -1.052484000 | 2.893295000  |
| H  | 1.129364000  | -0.553330000 | 3.432259000  |
| H  | -0.520478000 | -1.170279000 | 3.612522000  |
| H  | 0.638406000  | -2.055139000 | 2.590529000  |
| C  | -0.623810000 | -0.674484000 | 0.501686000  |
| C  | -0.756864000 | -2.117242000 | 0.085216000  |
| H  | -0.655663000 | -2.234306000 | -1.003467000 |
| H  | -0.014826000 | -2.765537000 | 0.570030000  |
| H  | -1.755816000 | -2.486762000 | 0.371411000  |
| Au | 1.653417000  | -0.198009000 | 0.148404000  |
| P  | 3.825548000  | -0.030042000 | -0.698812000 |
| C  | 4.009102000  | 1.293340000  | -1.948068000 |
| H  | 3.722249000  | 2.258172000  | -1.505780000 |
| H  | 5.053433000  | 1.344332000  | -2.292544000 |
| H  | 3.351325000  | 1.083151000  | -2.803588000 |
| C  | 5.060357000  | 0.329321000  | 0.602171000  |
| H  | 6.066340000  | 0.383750000  | 0.158302000  |
| H  | 4.820329000  | 1.288850000  | 1.081763000  |
| H  | 5.036849000  | -0.465584000 | 1.361605000  |
| C  | 4.385829000  | -1.571888000 | -1.508602000 |
| H  | 5.415328000  | -1.450861000 | -1.879335000 |
| H  | 4.353255000  | -2.398595000 | -0.784658000 |
| H  | 3.718973000  | -1.808541000 | -2.349930000 |



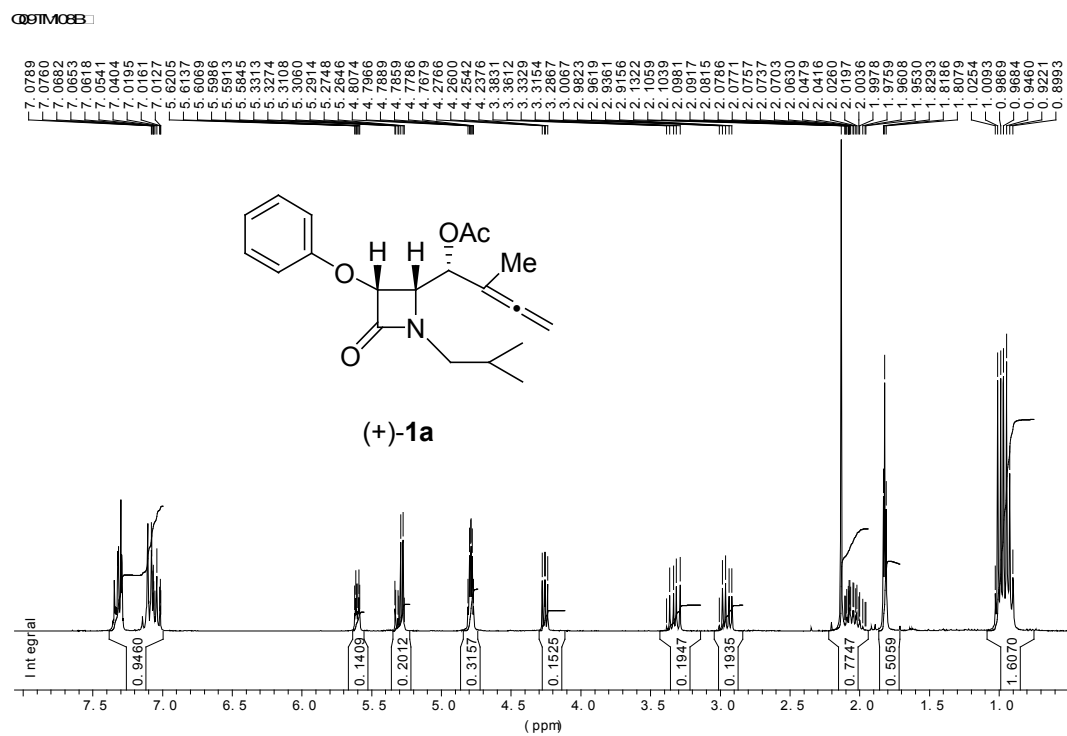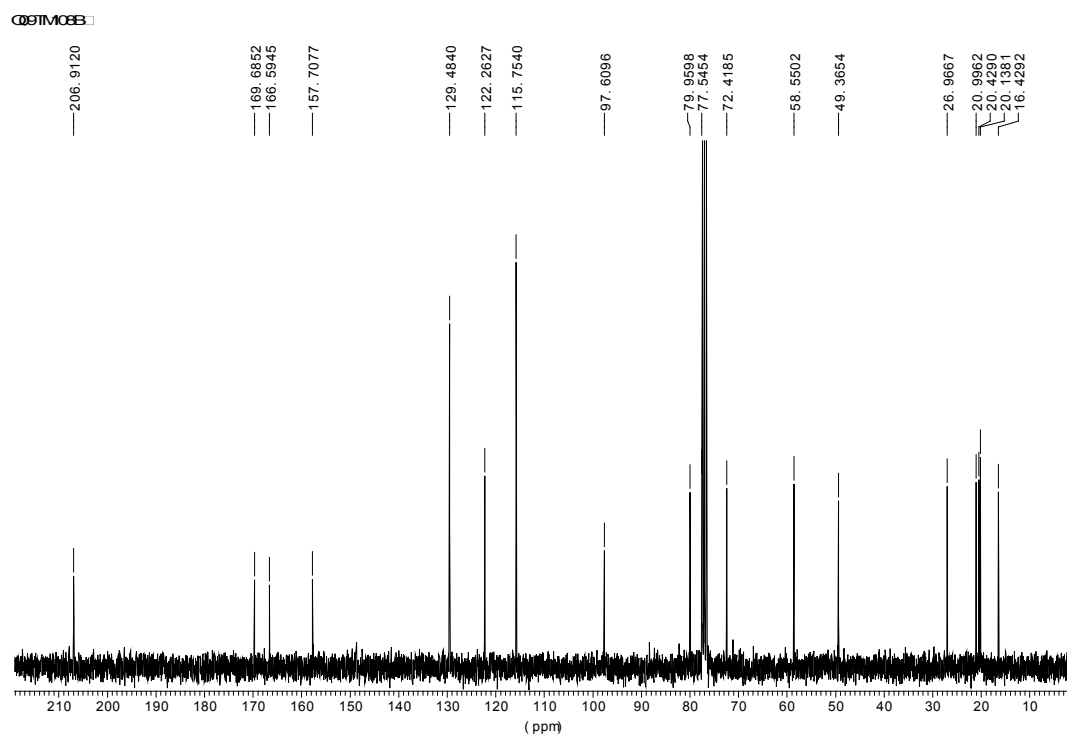

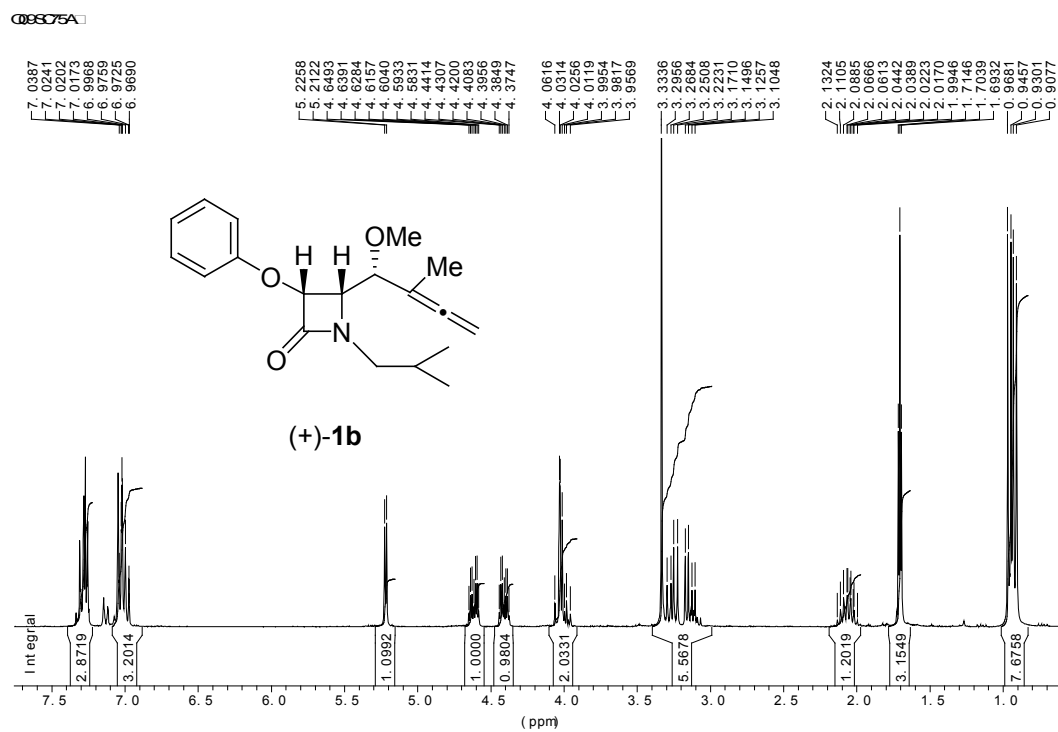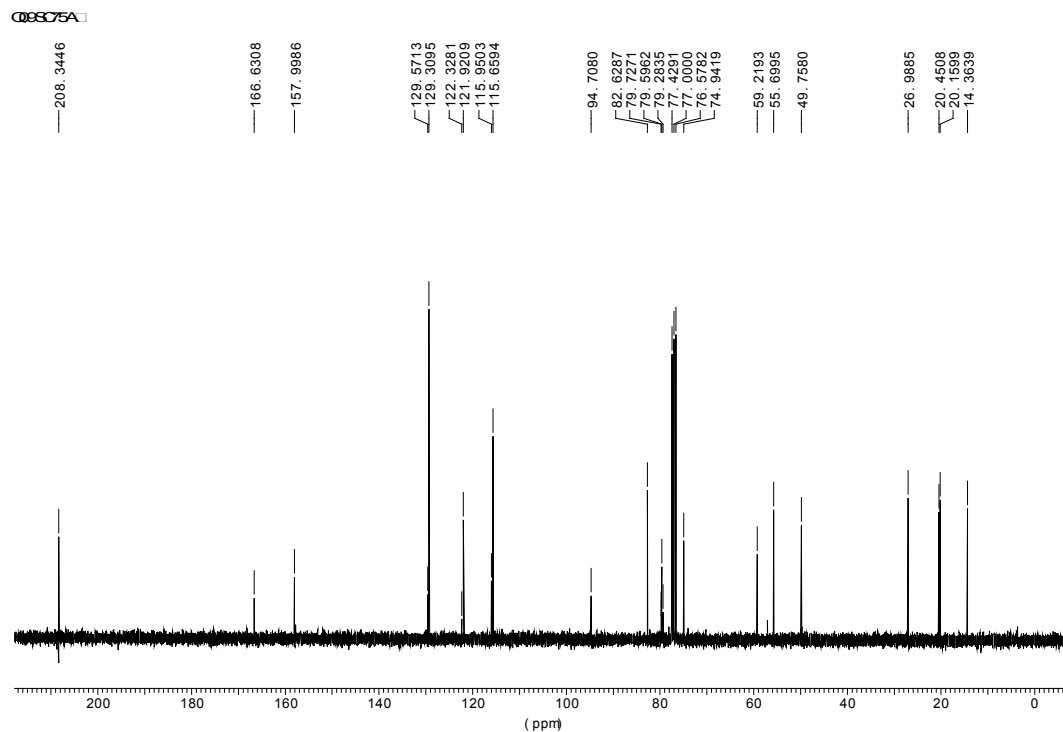

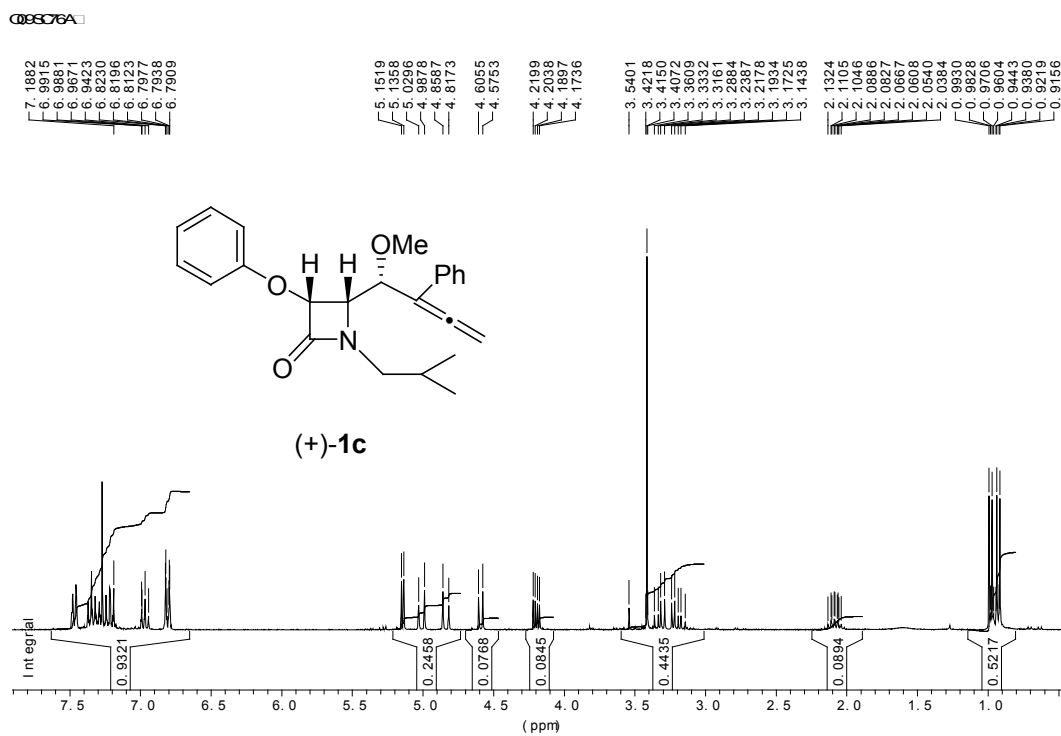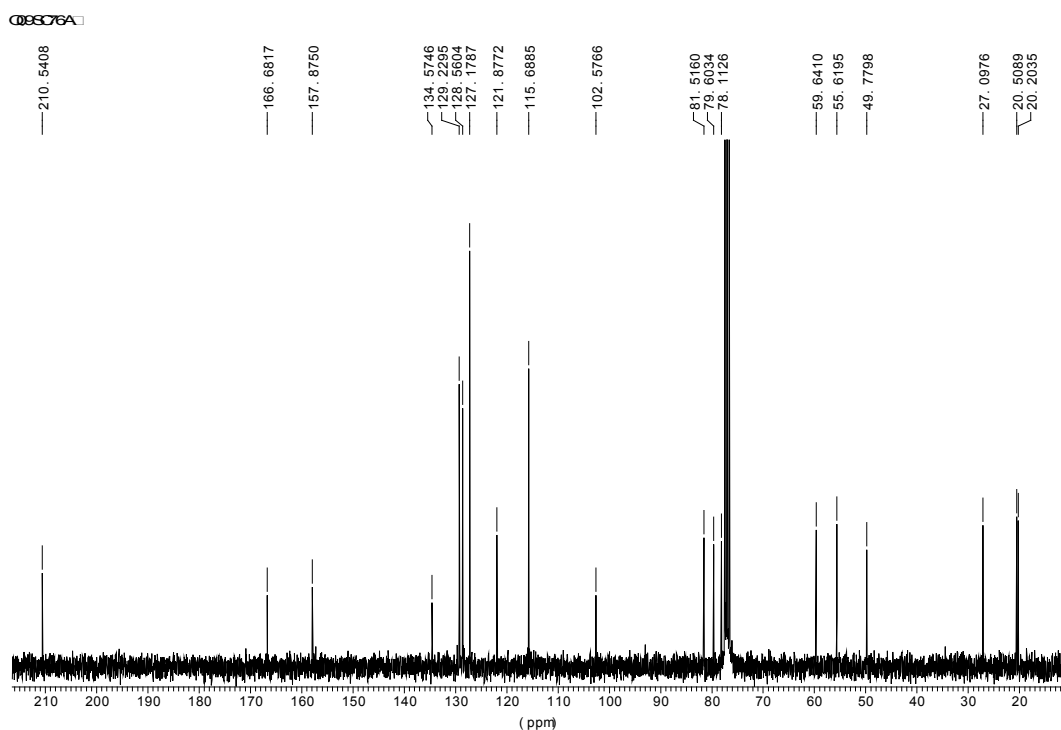

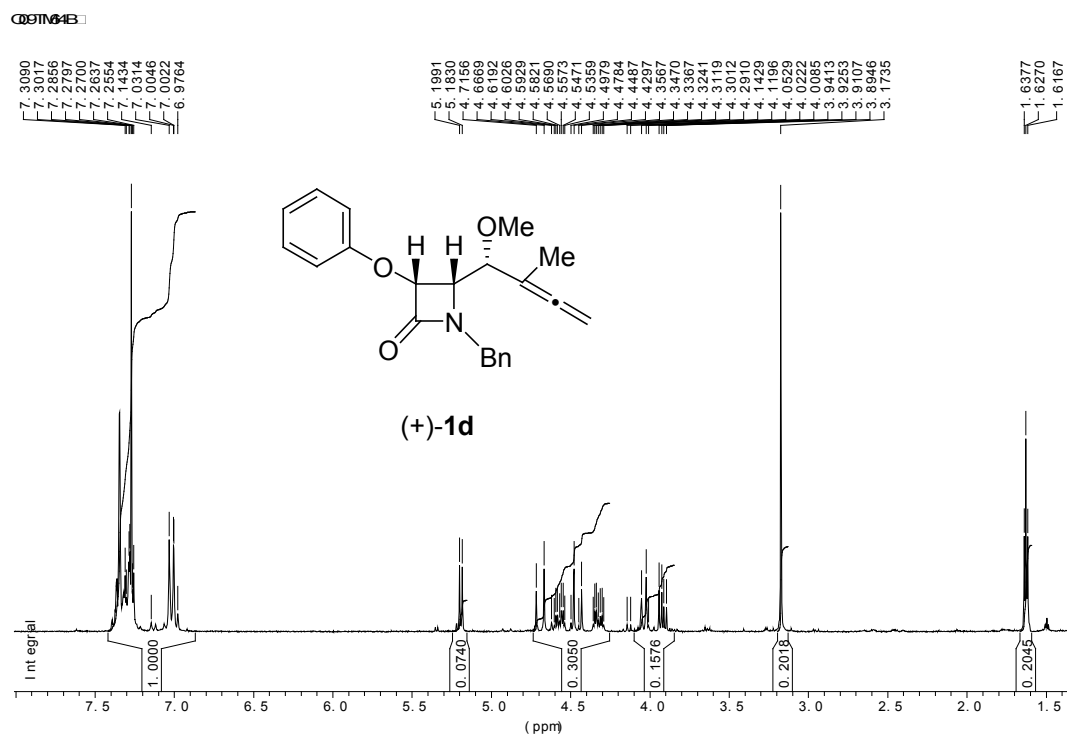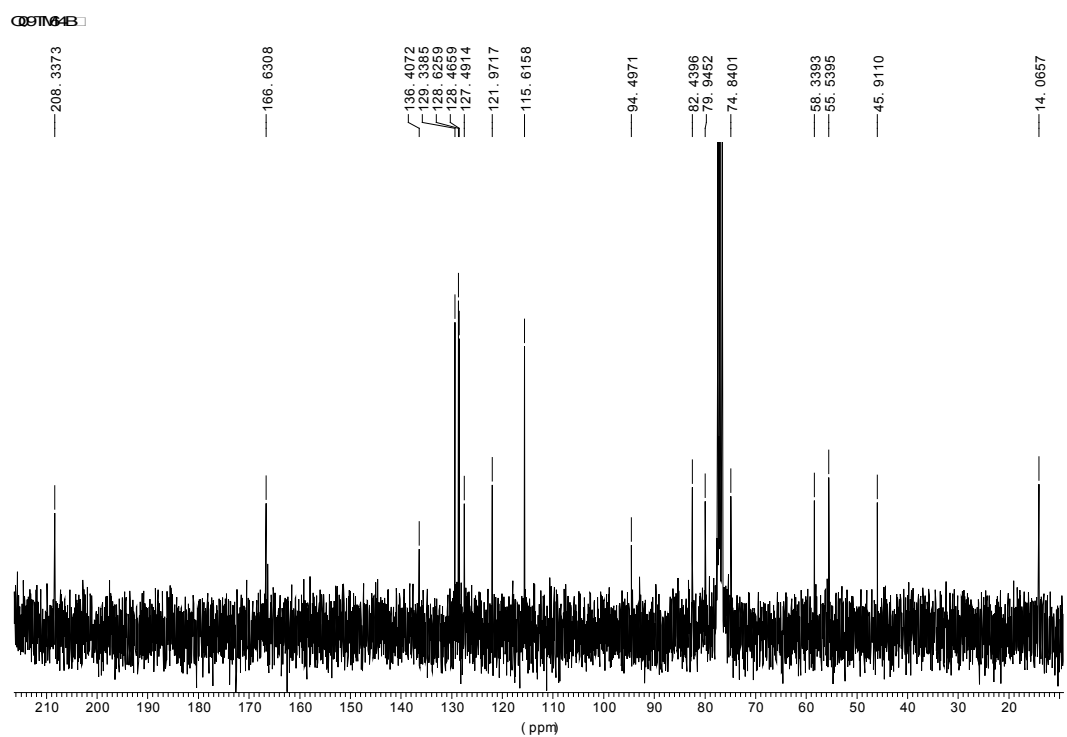

CDTMOB

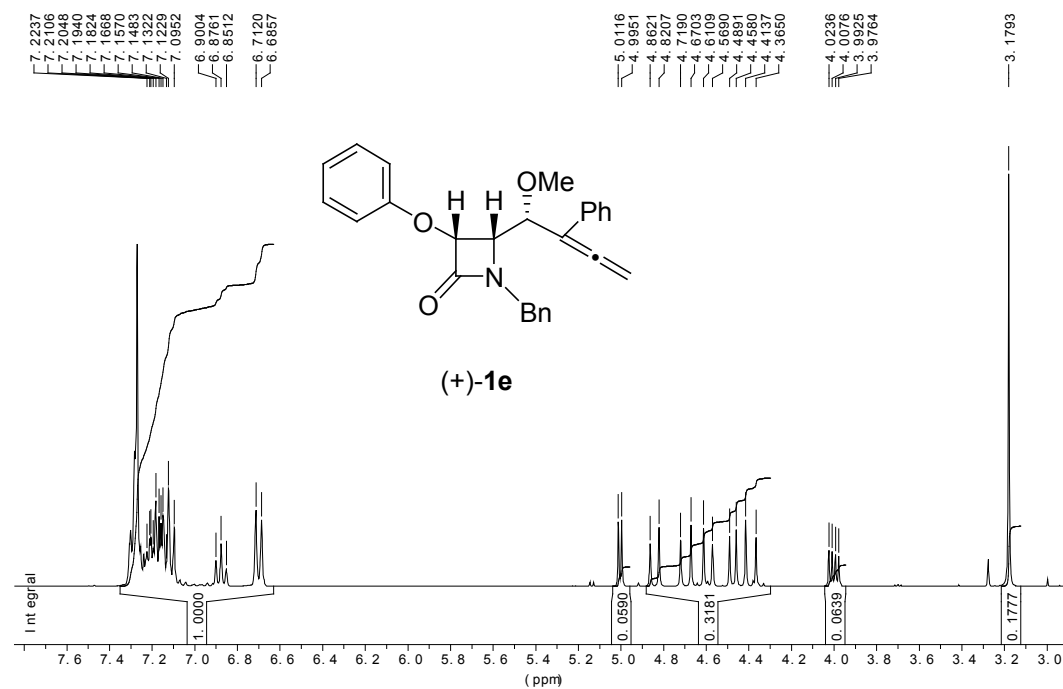

CDTMOB

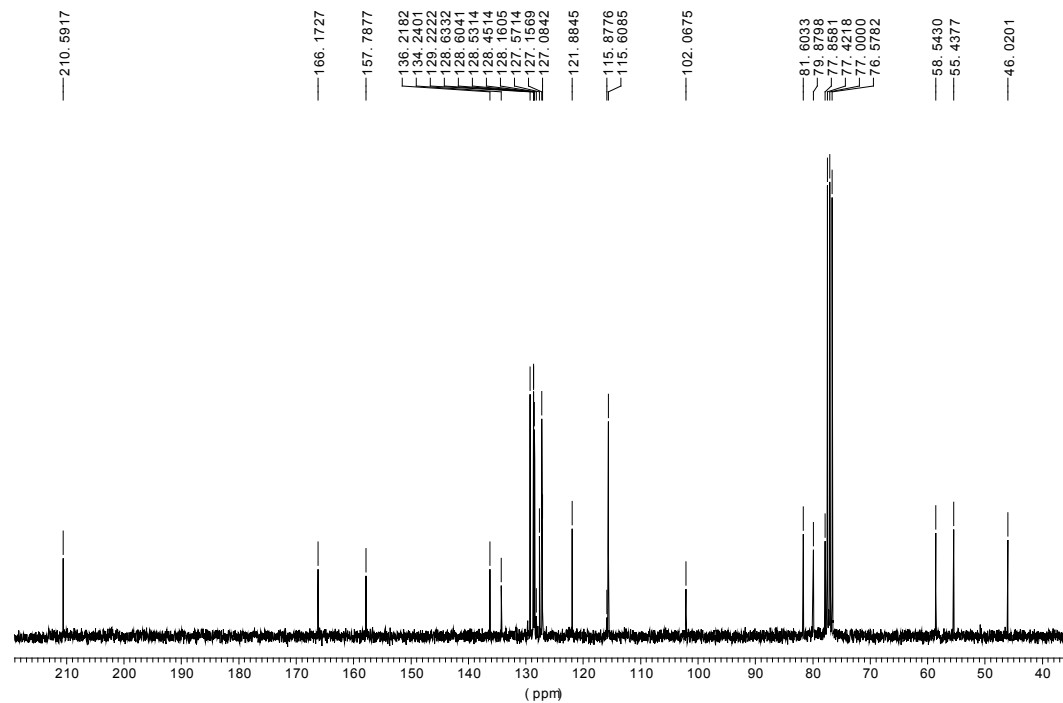

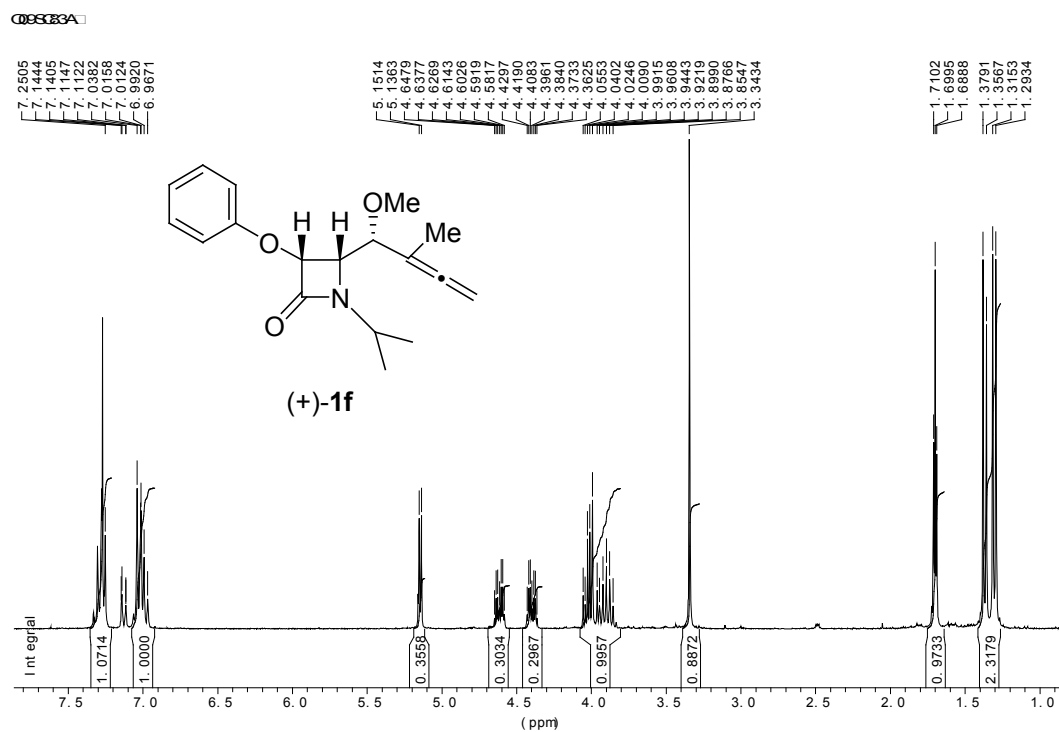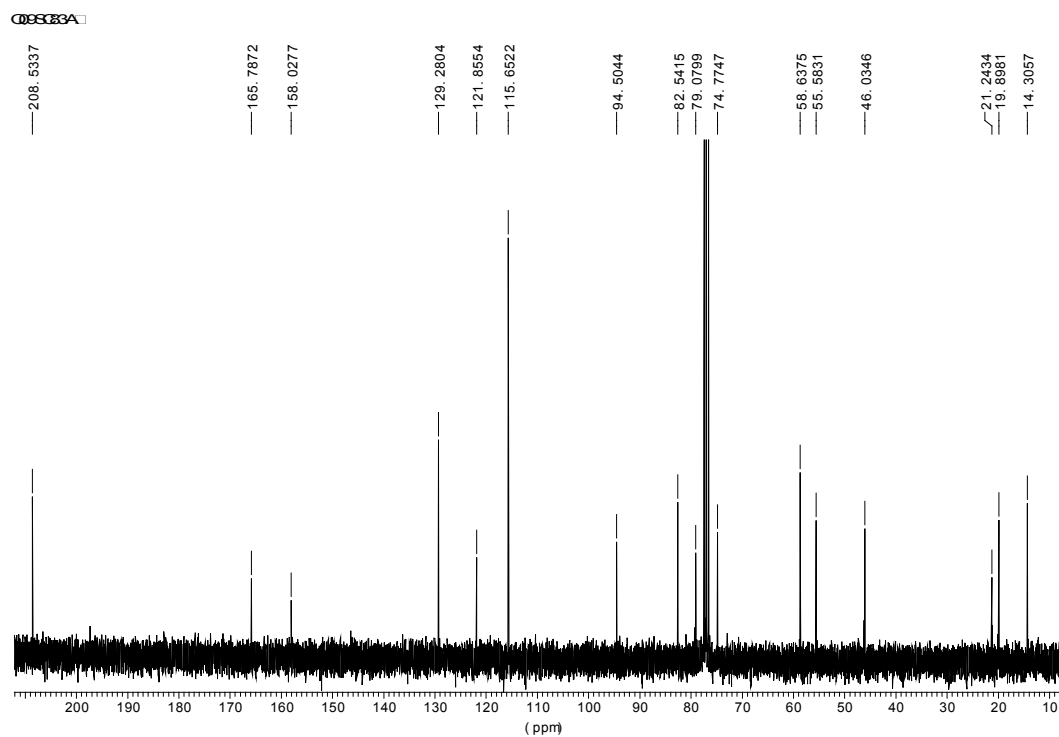

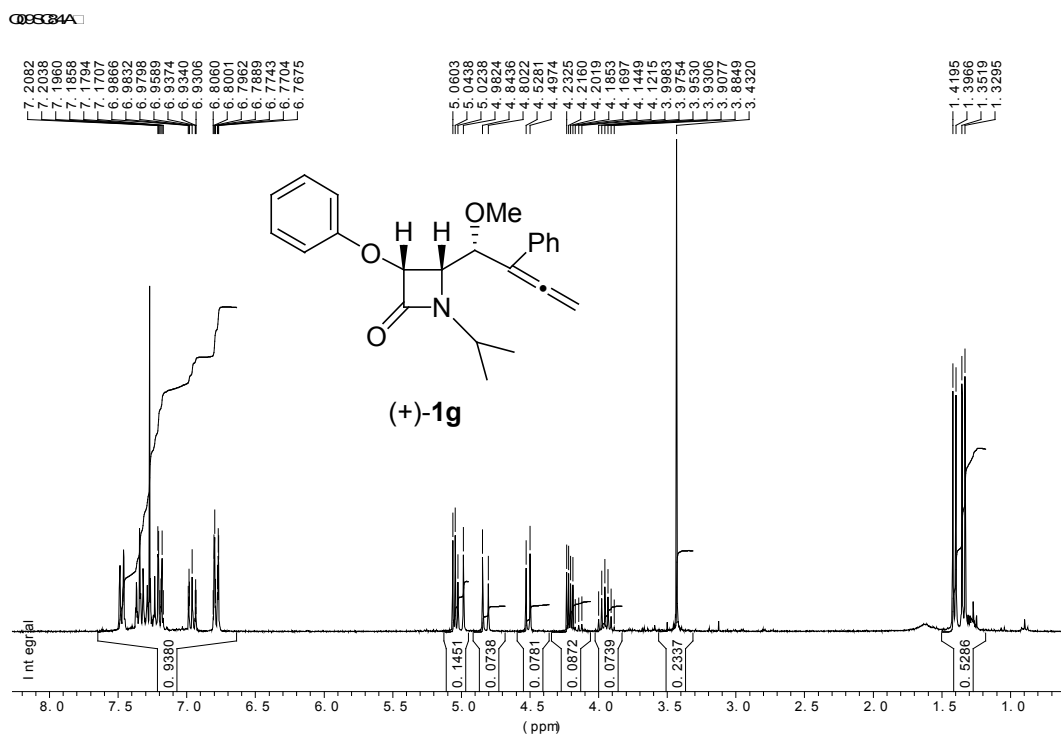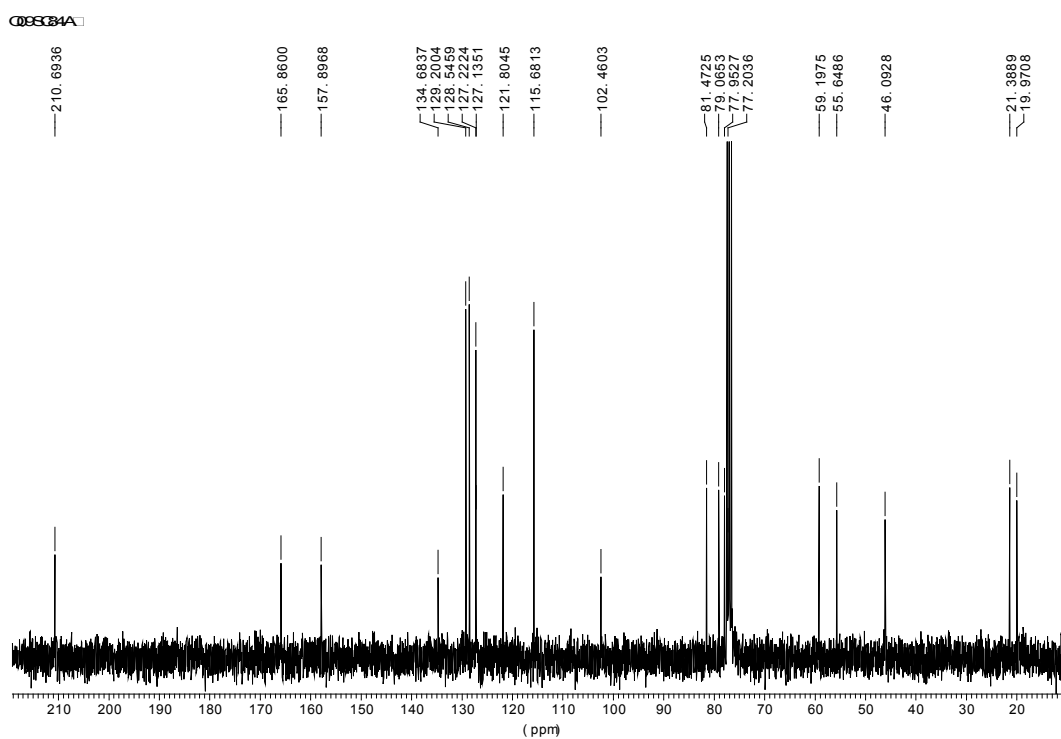

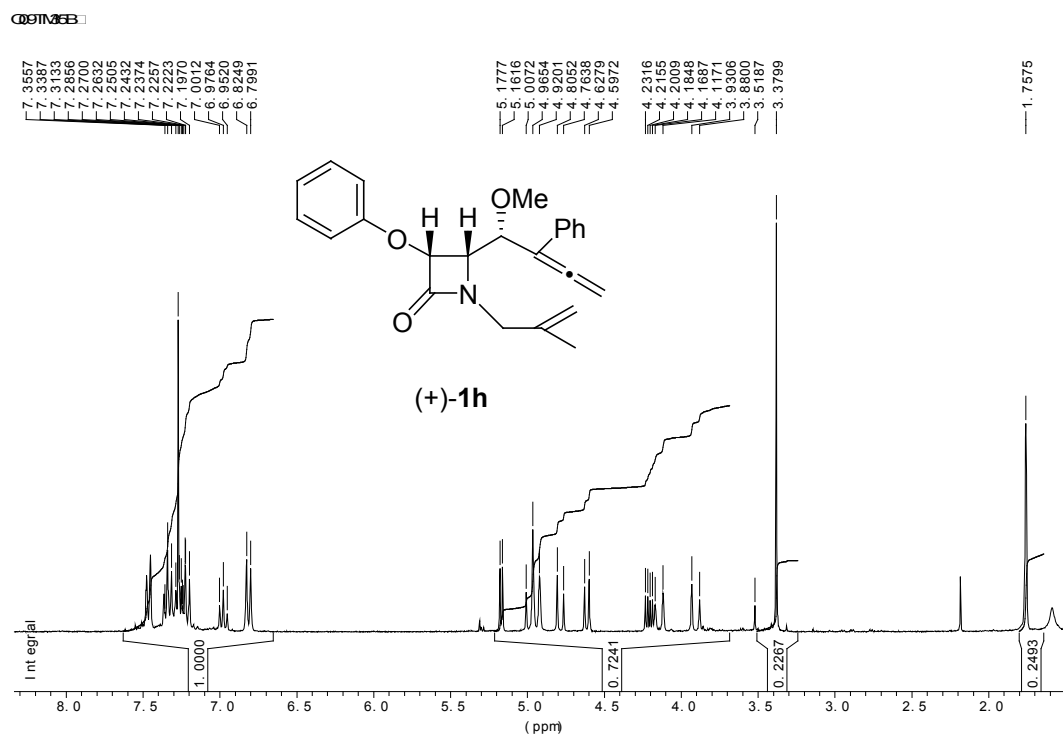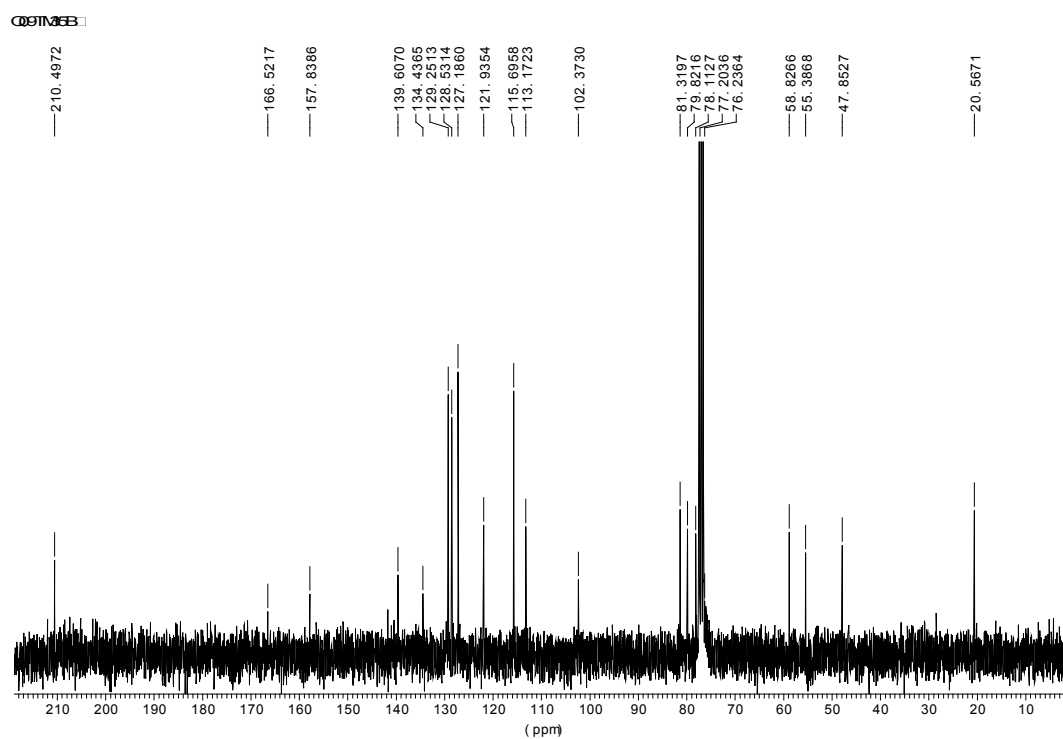



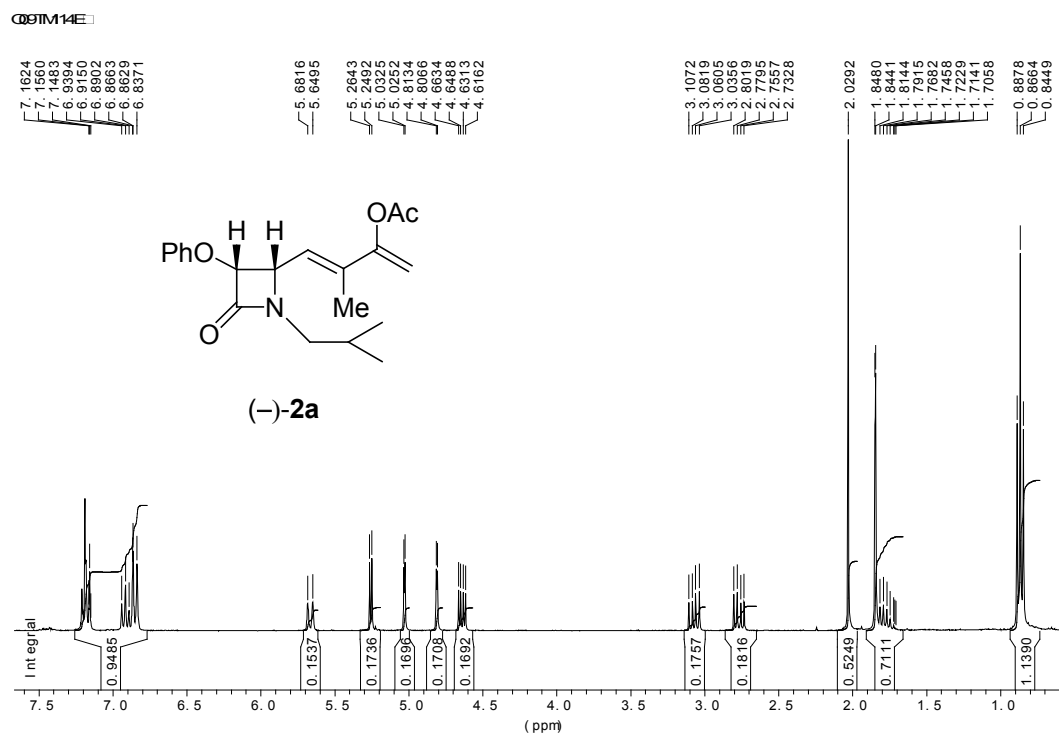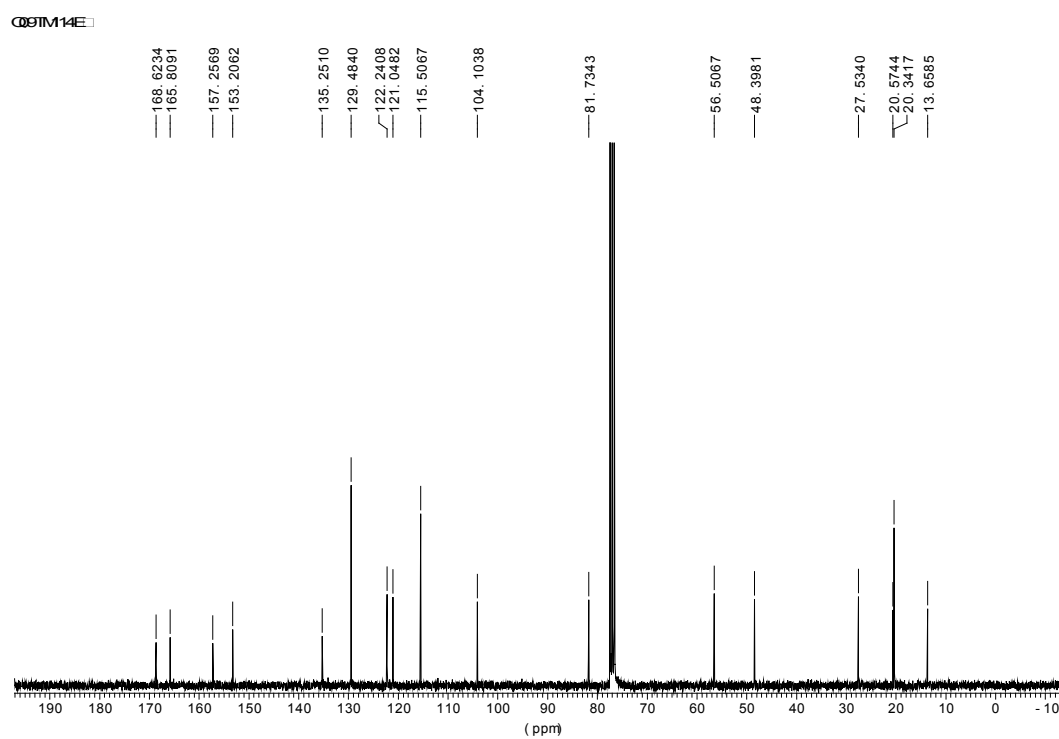

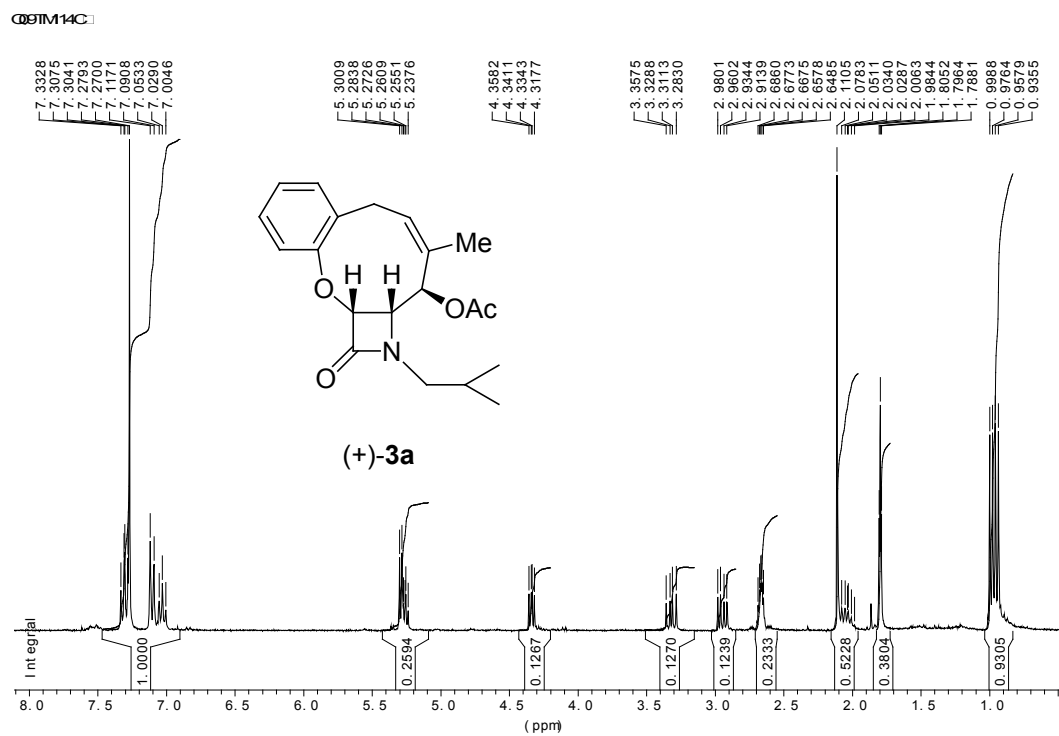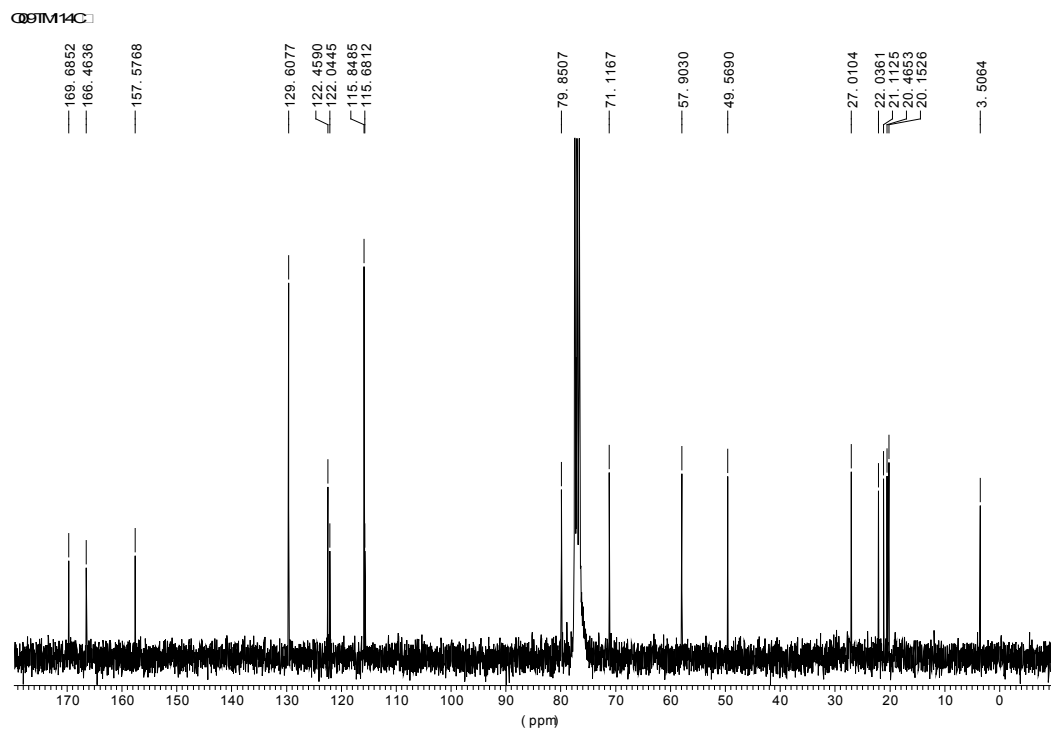

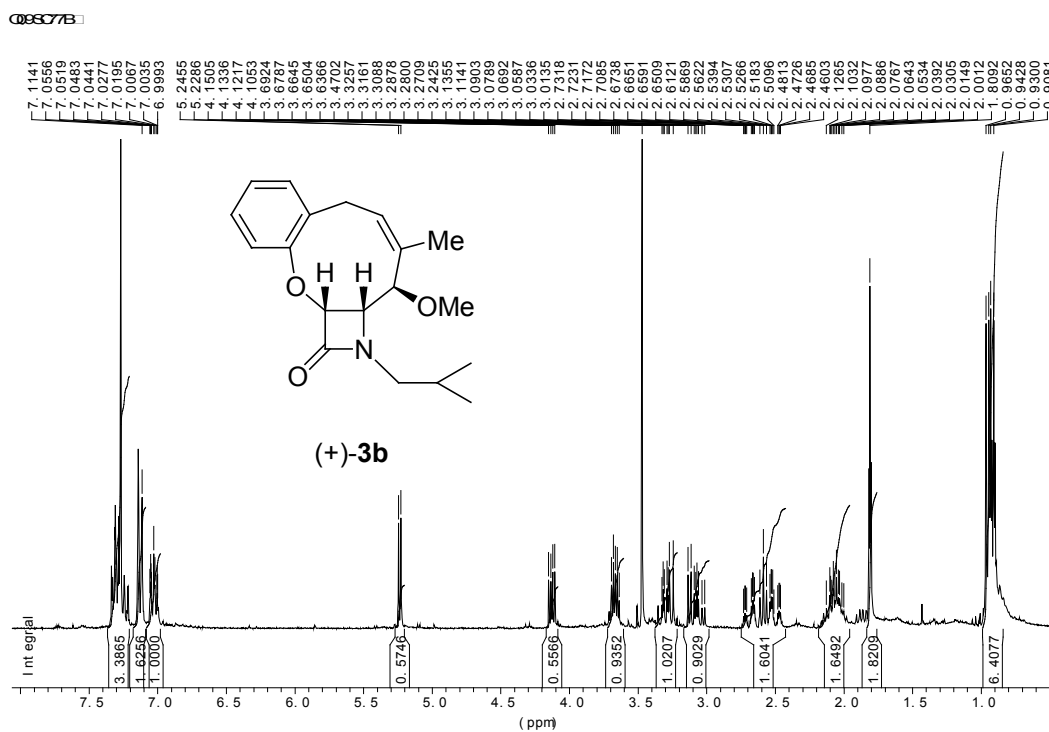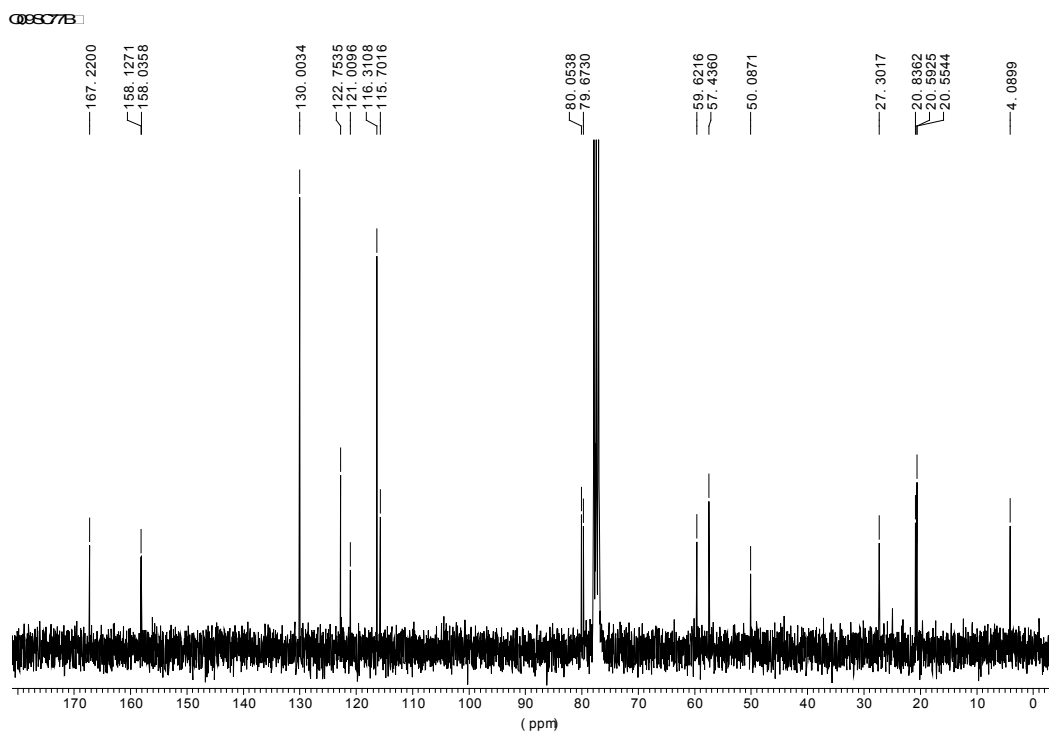

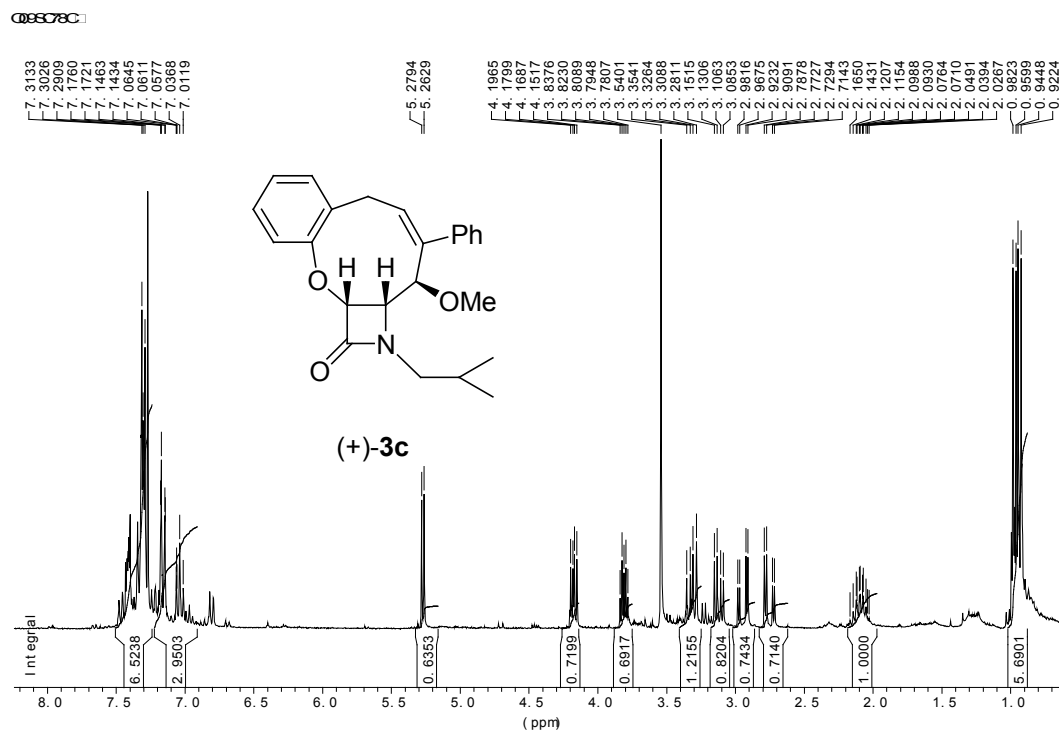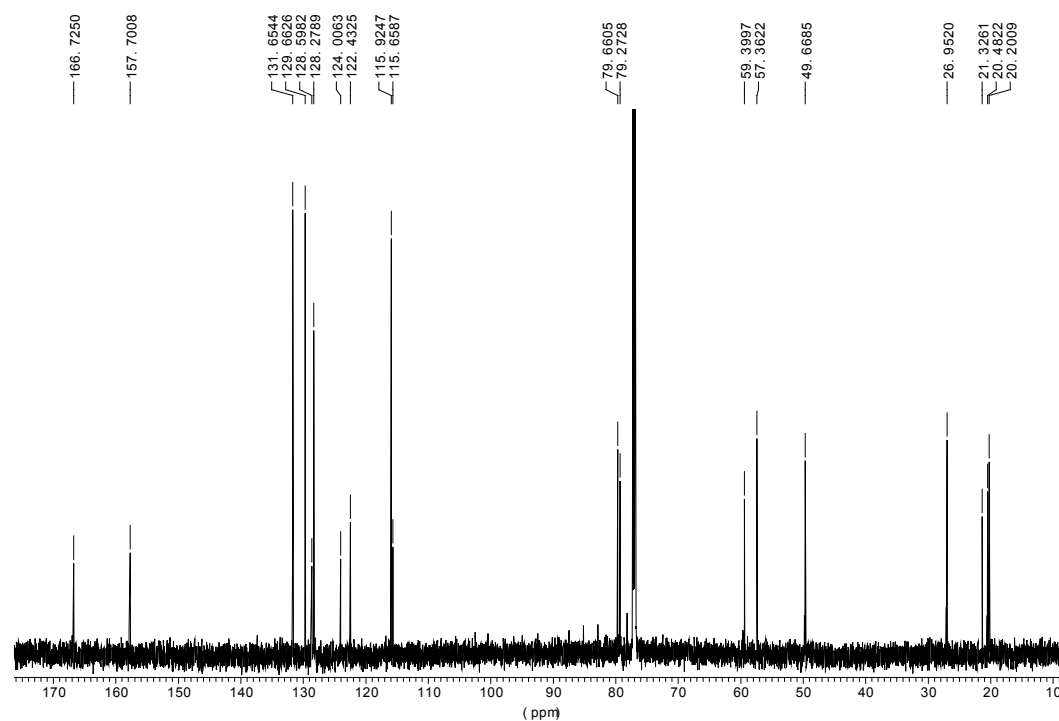

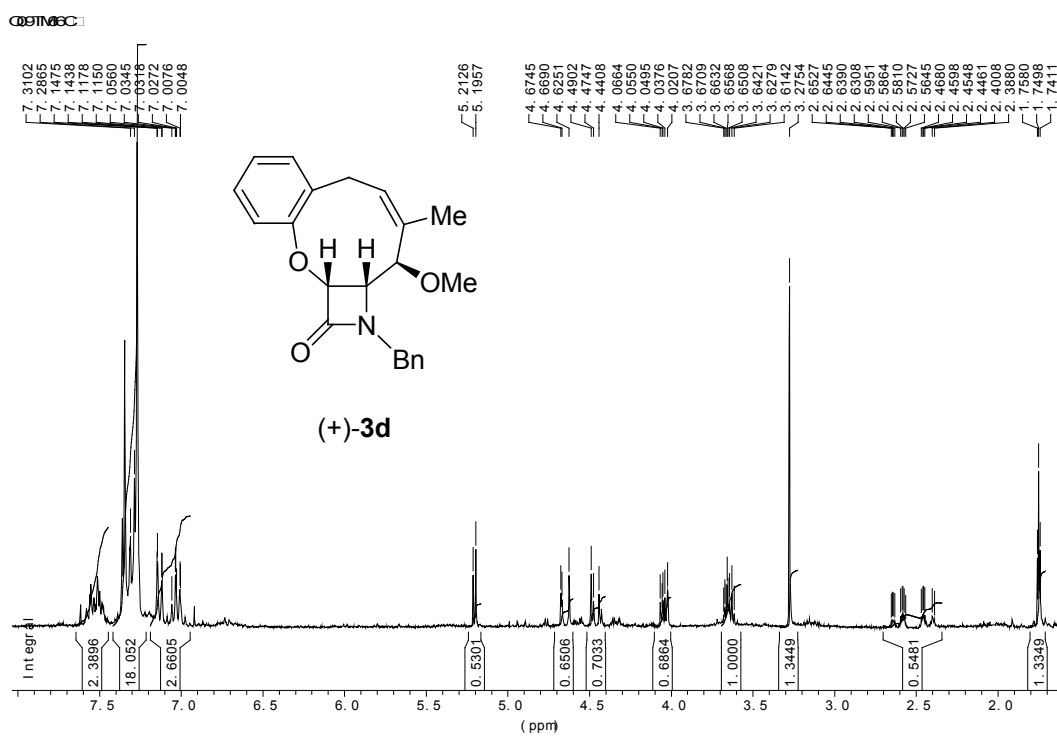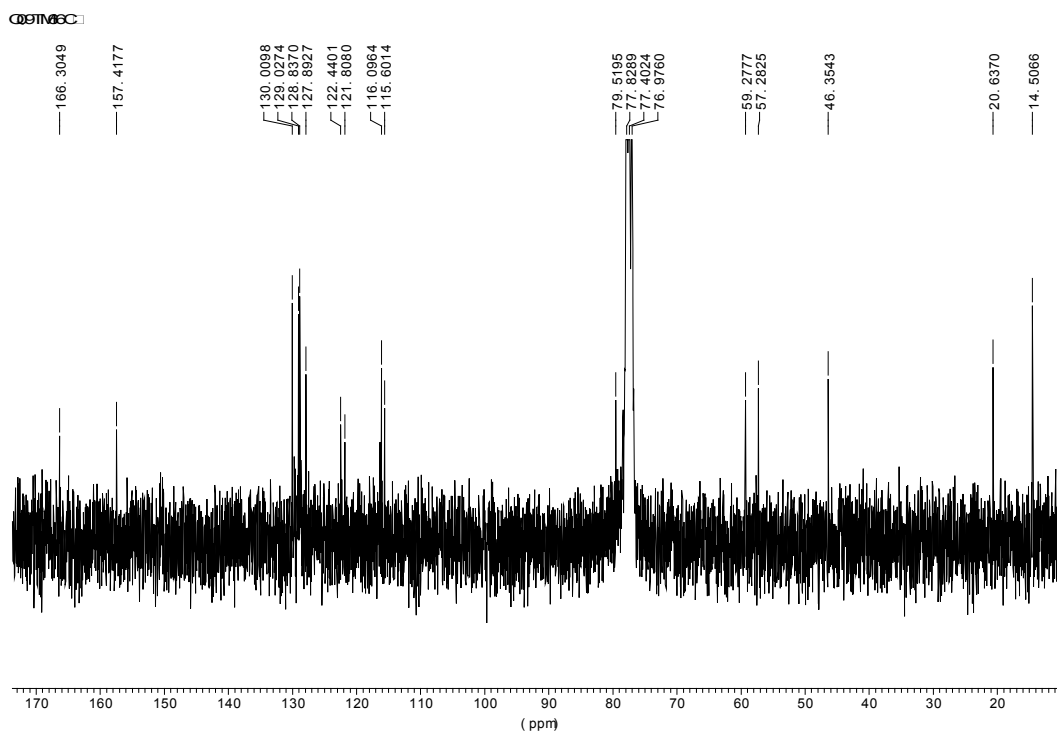

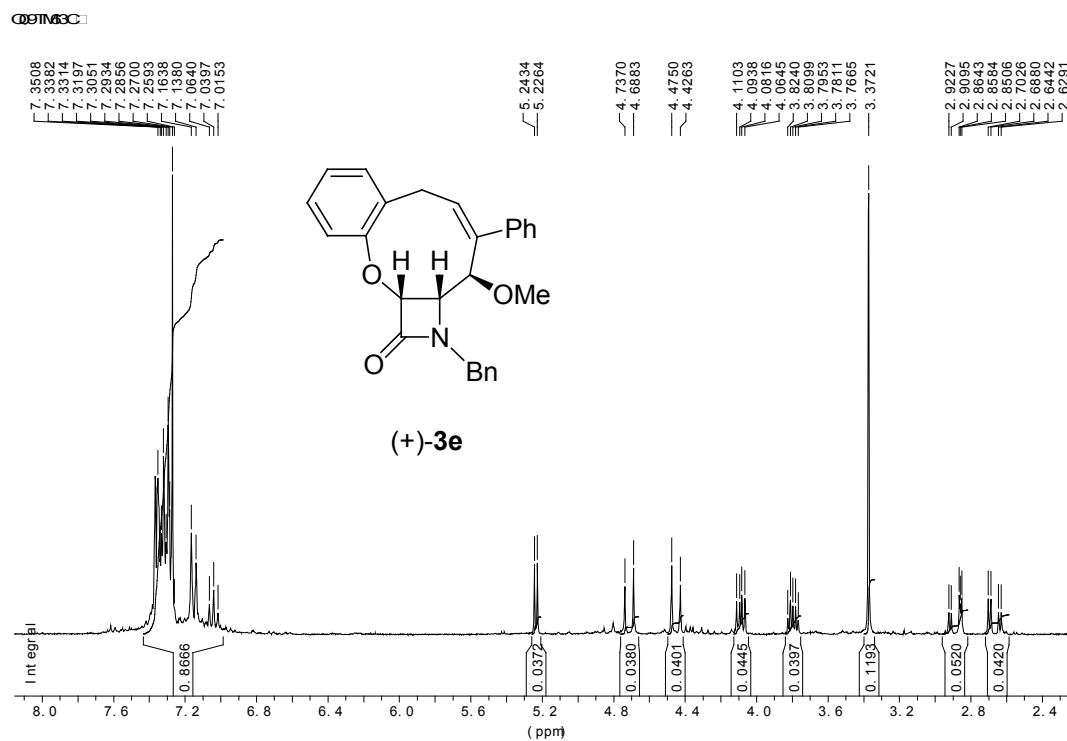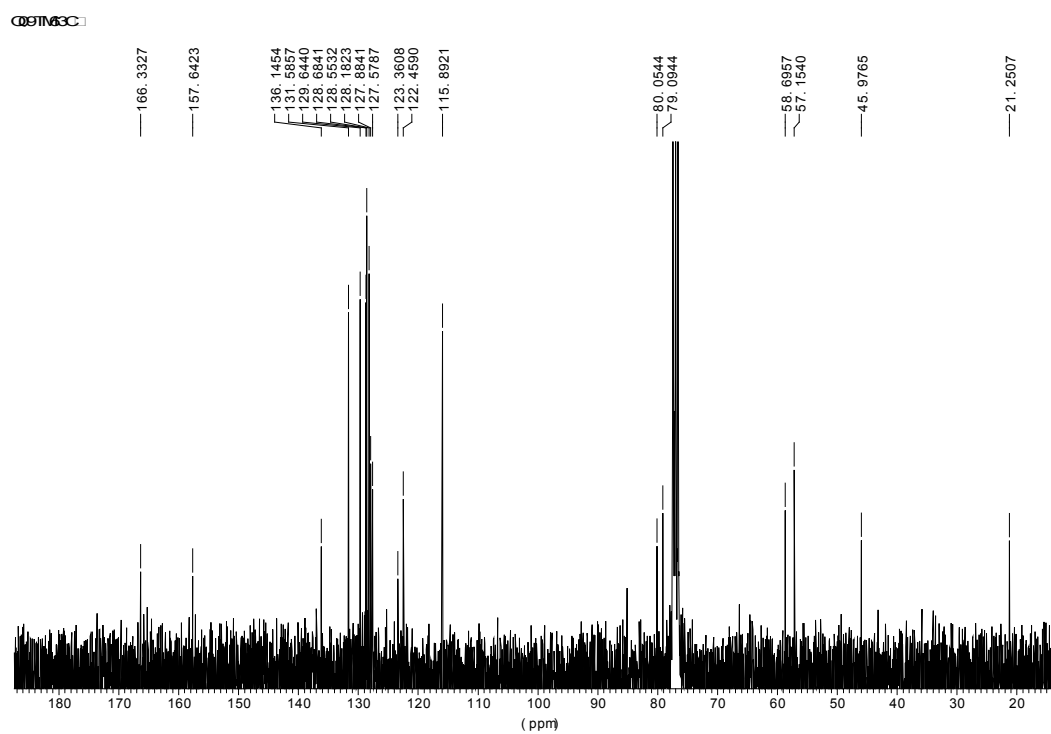

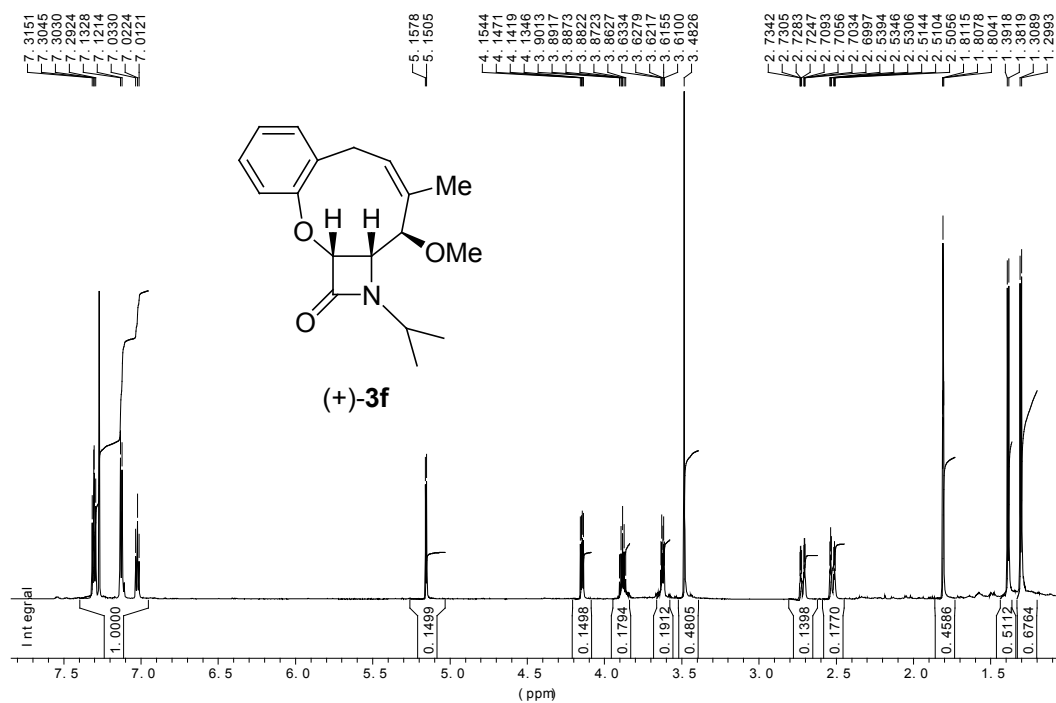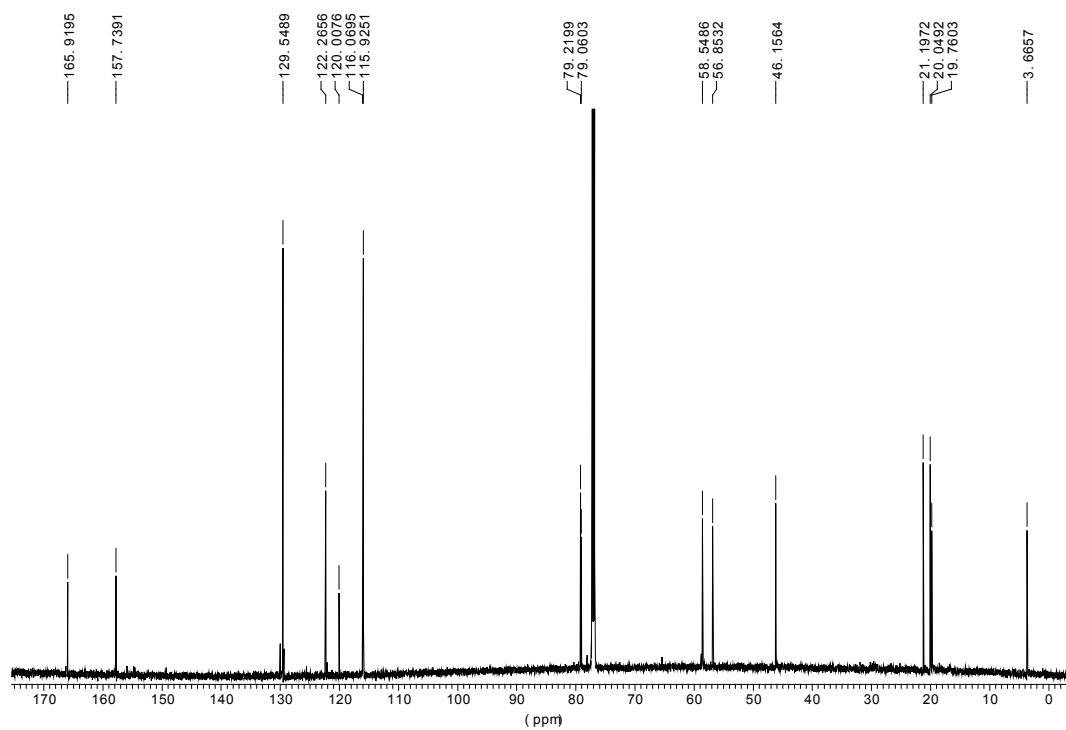

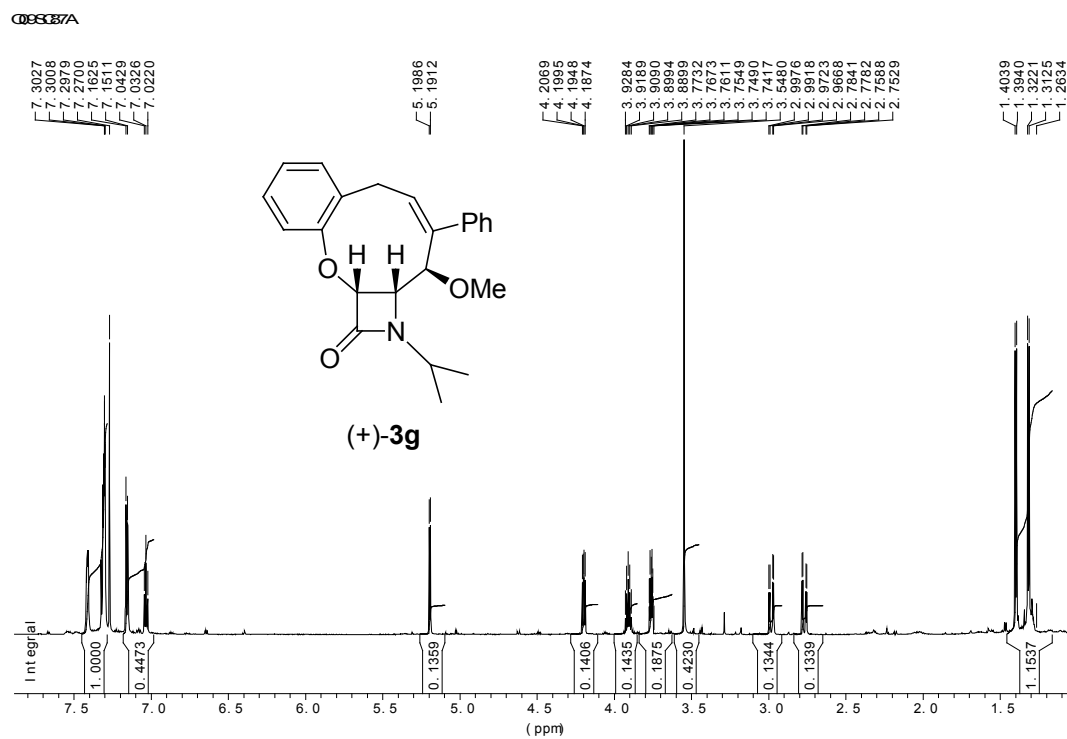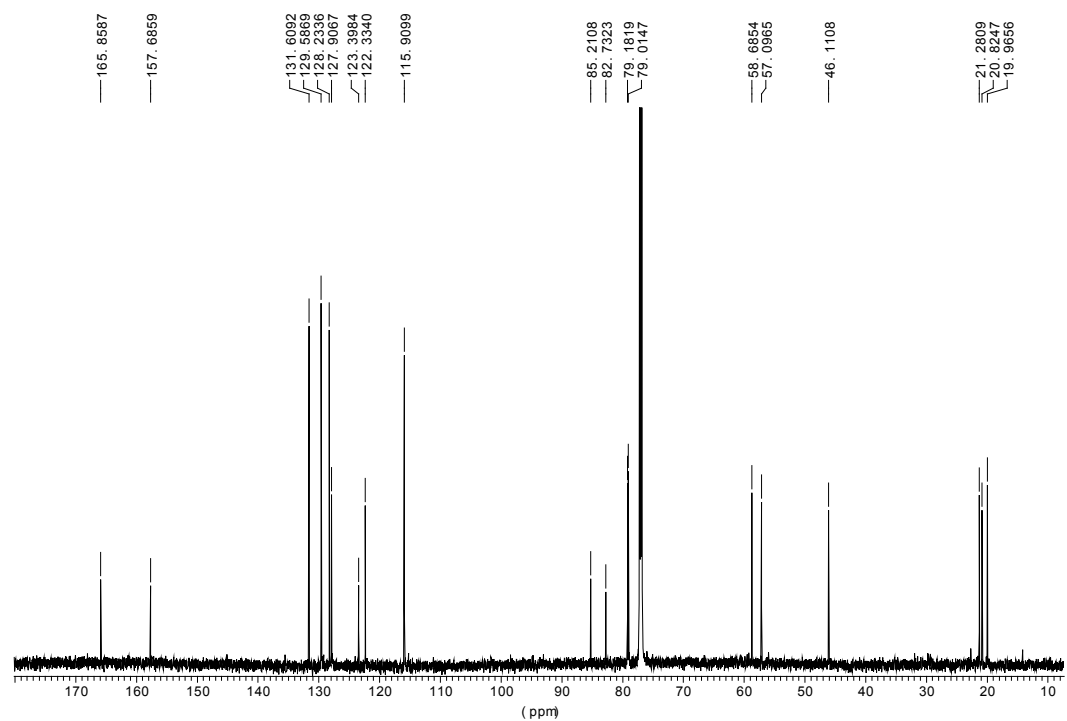



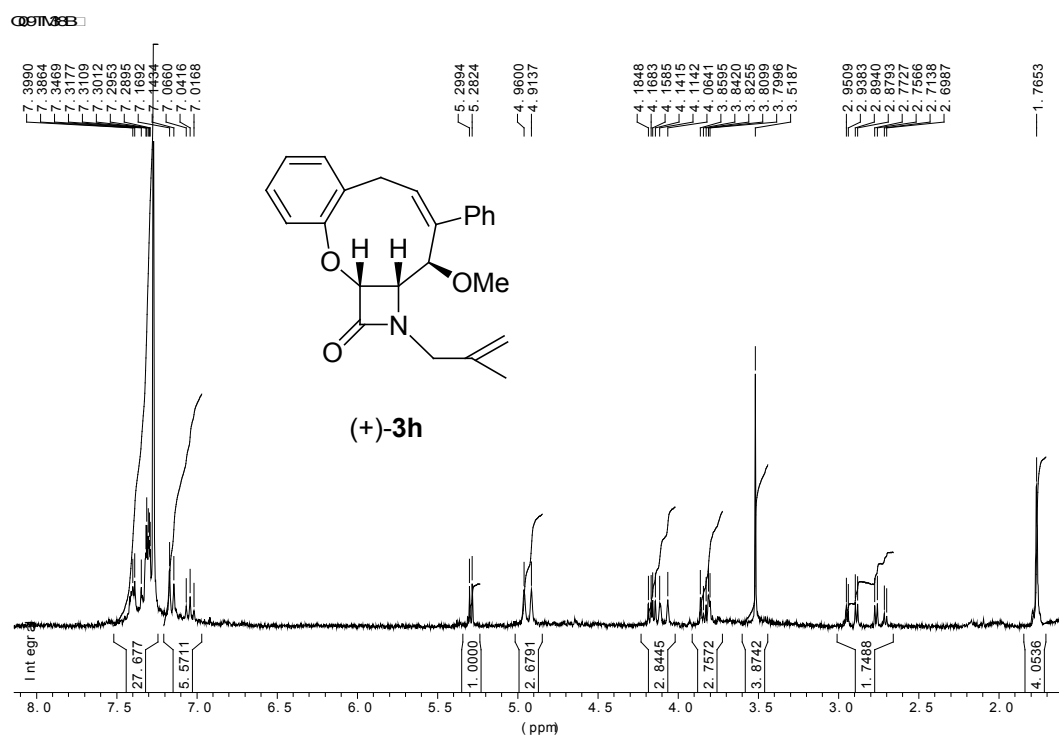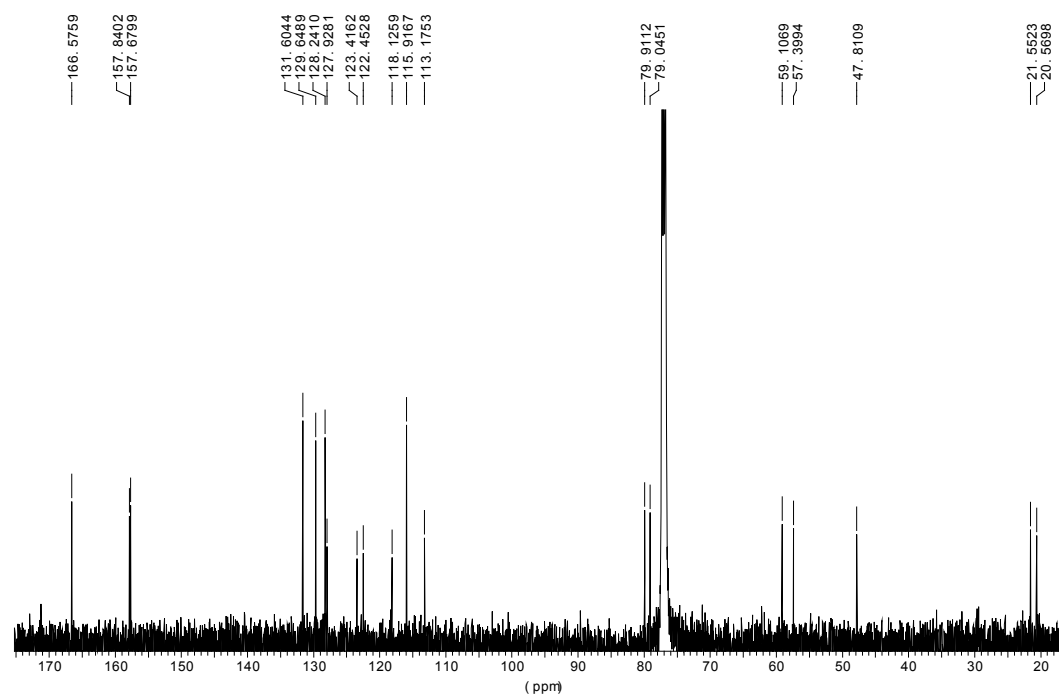

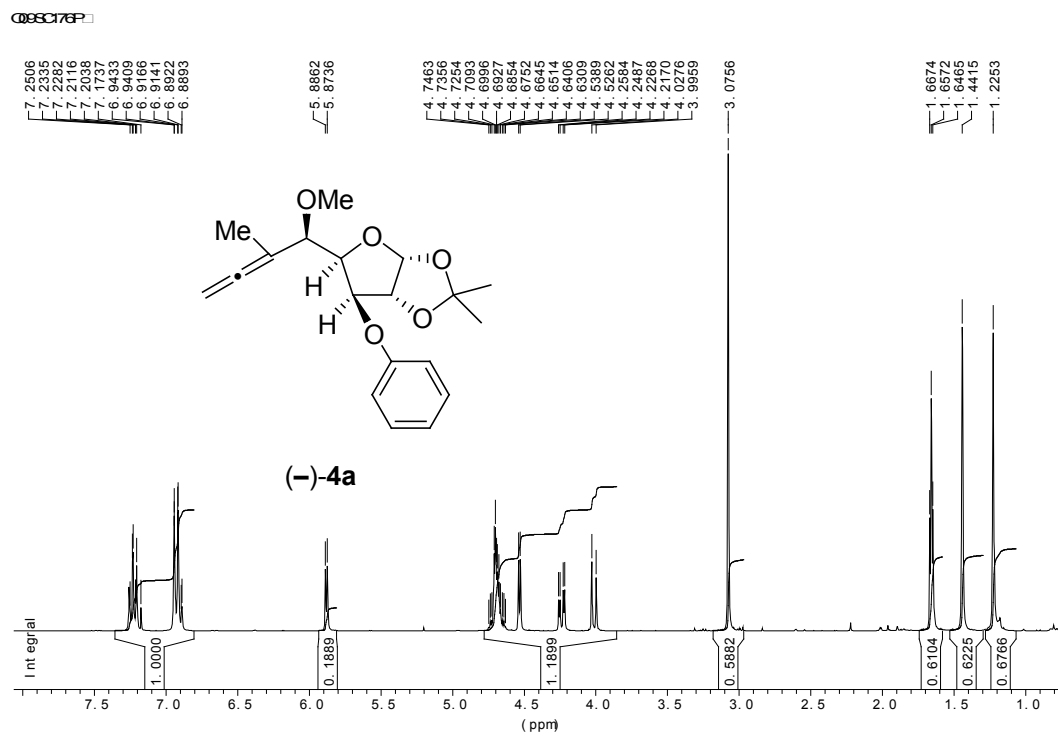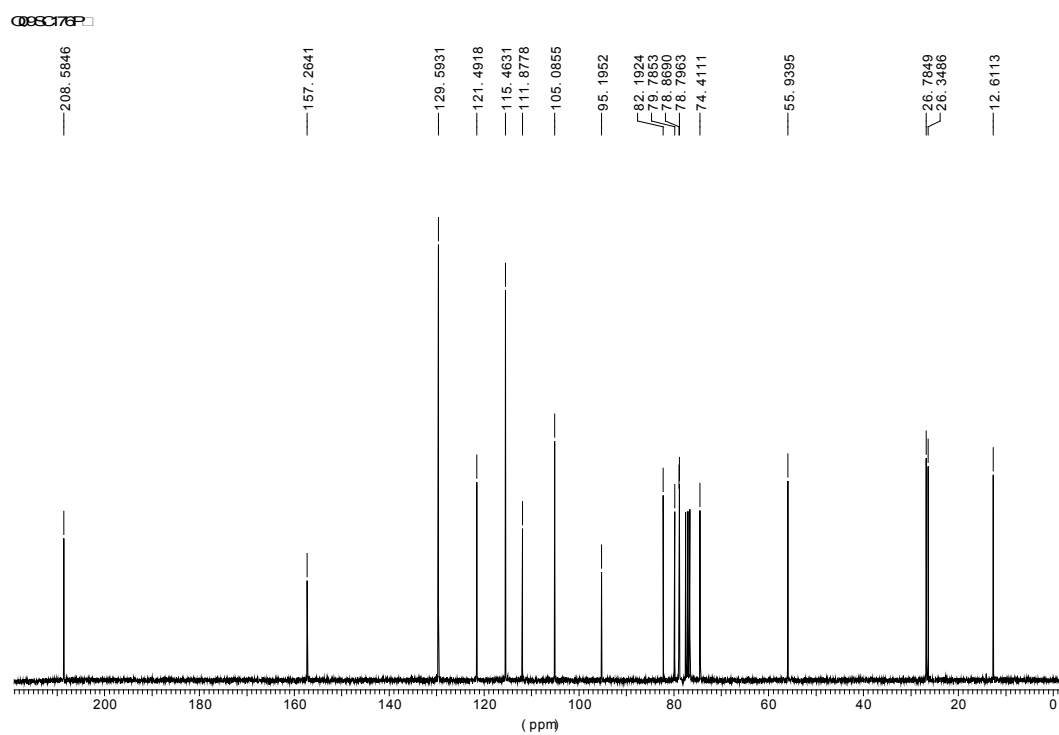

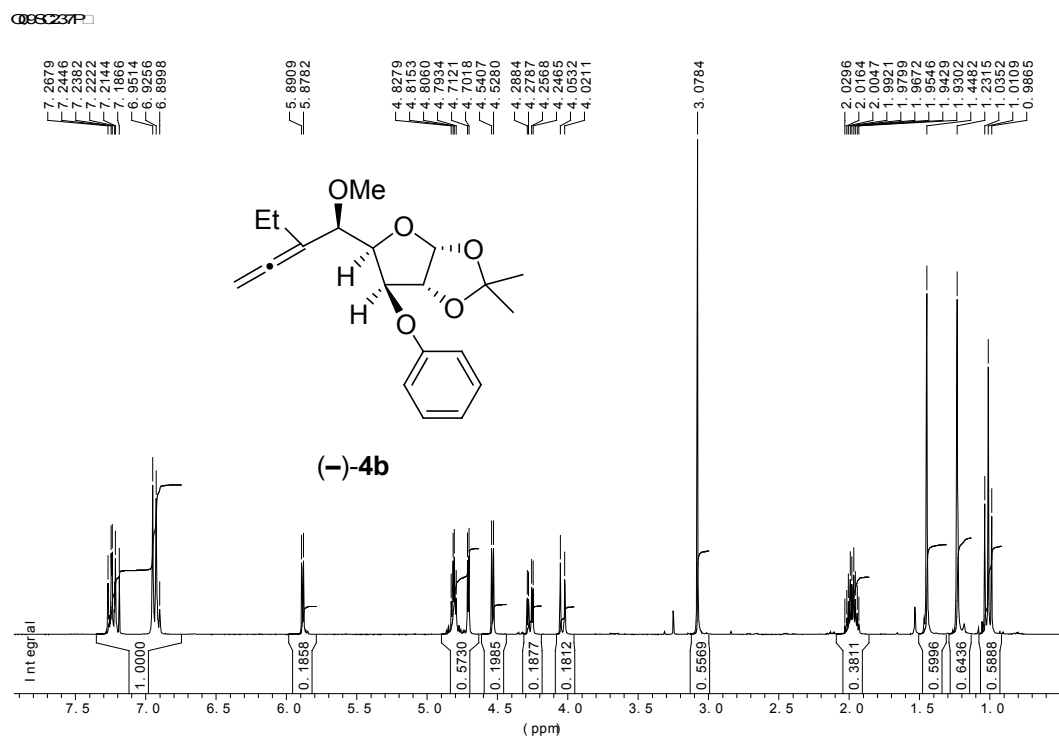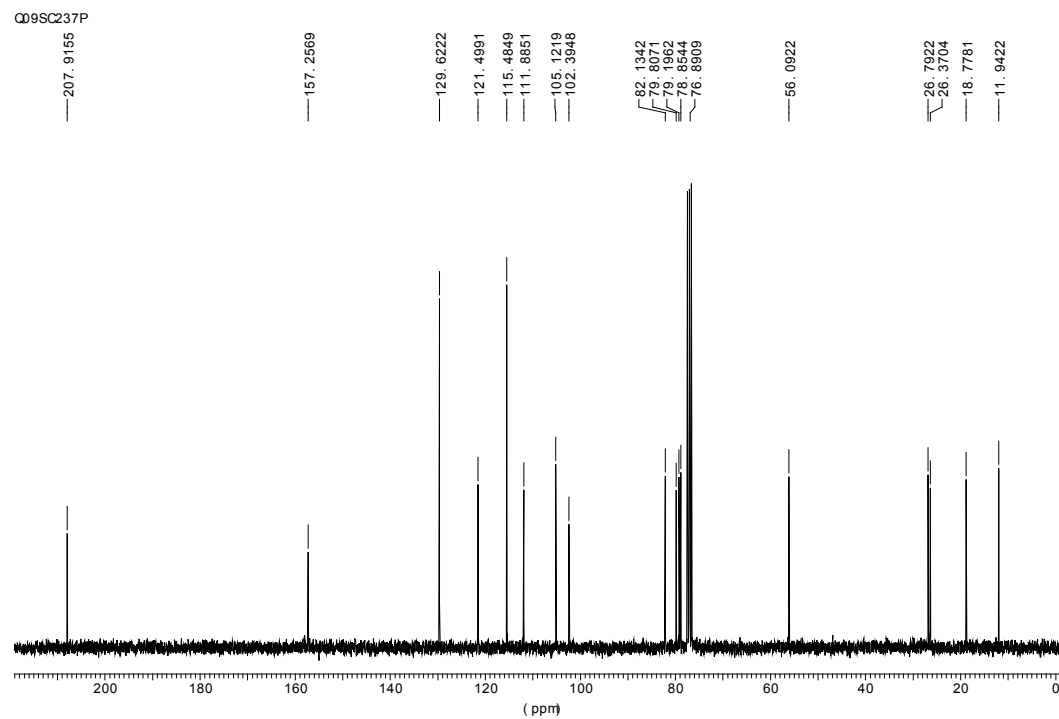

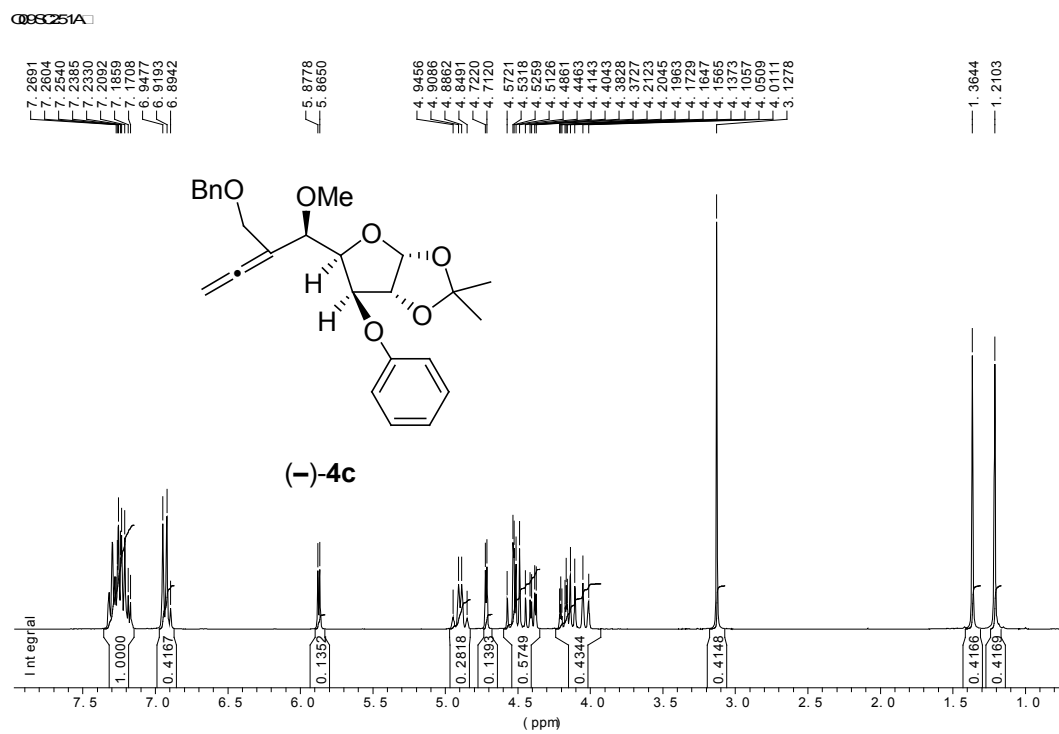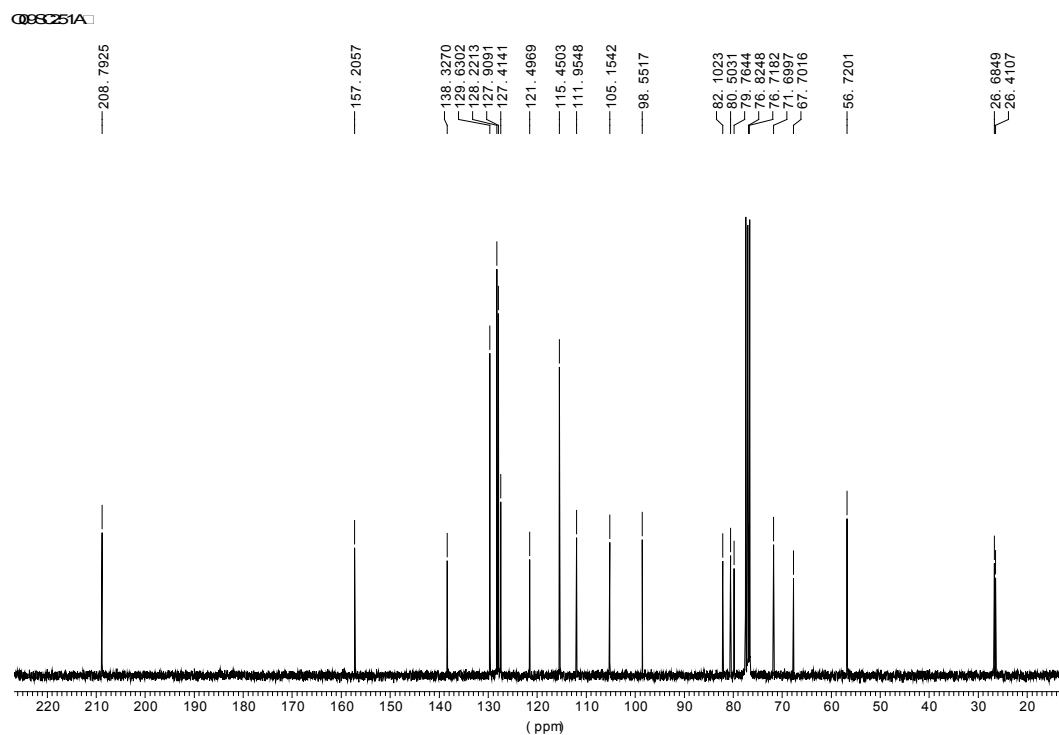

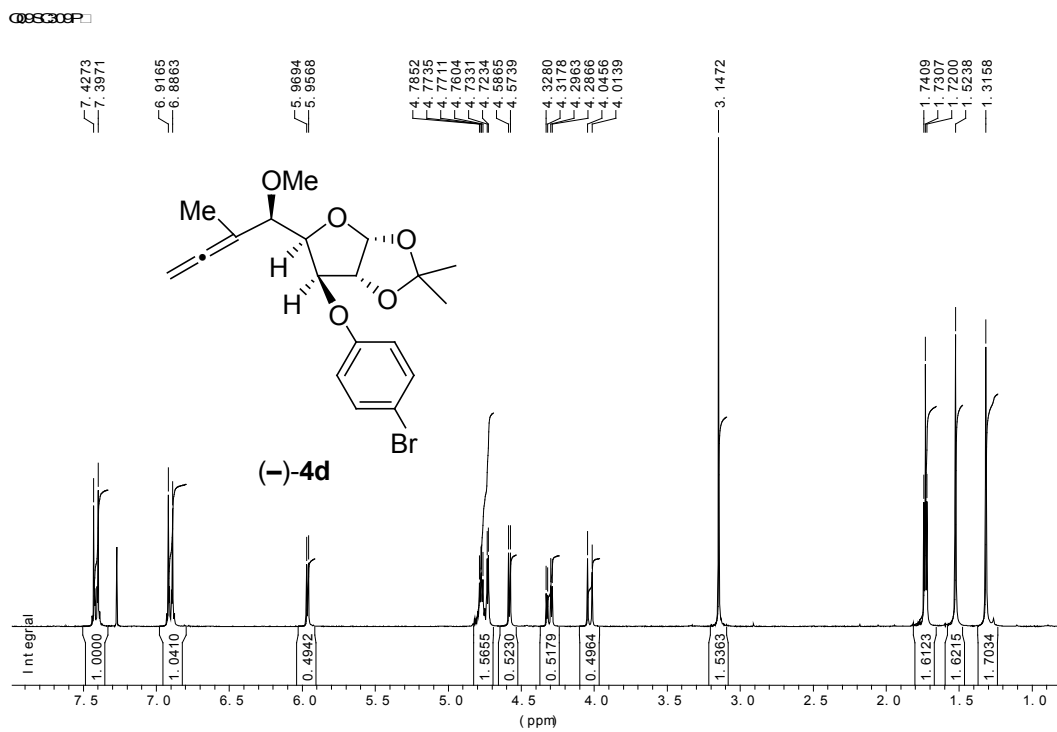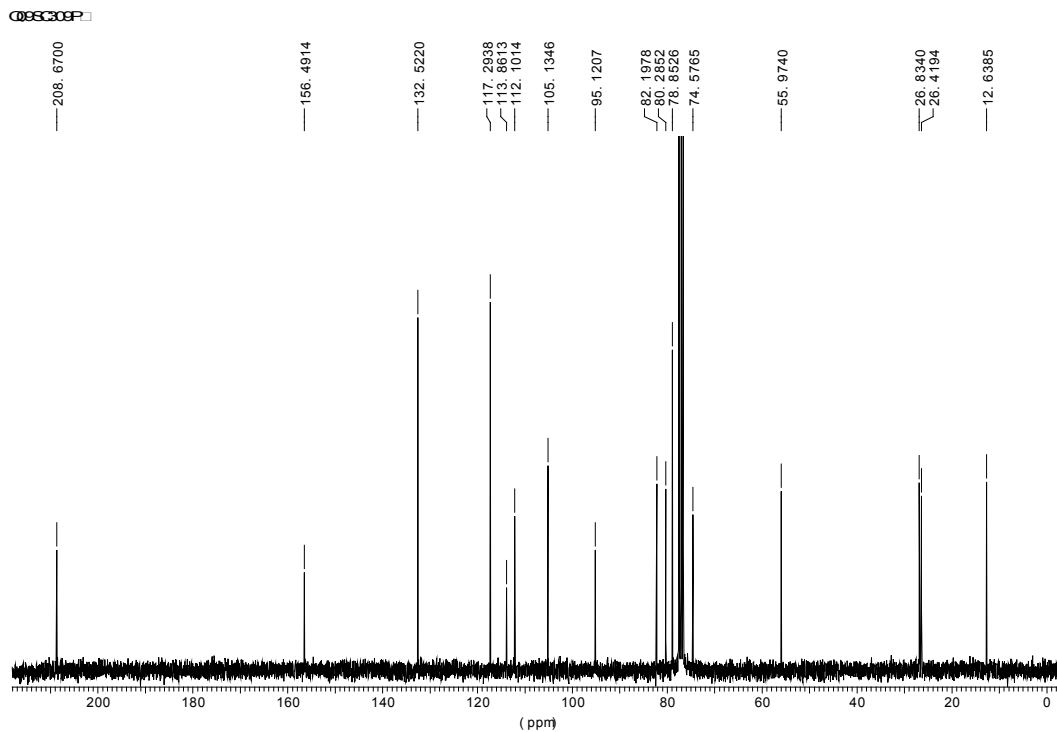

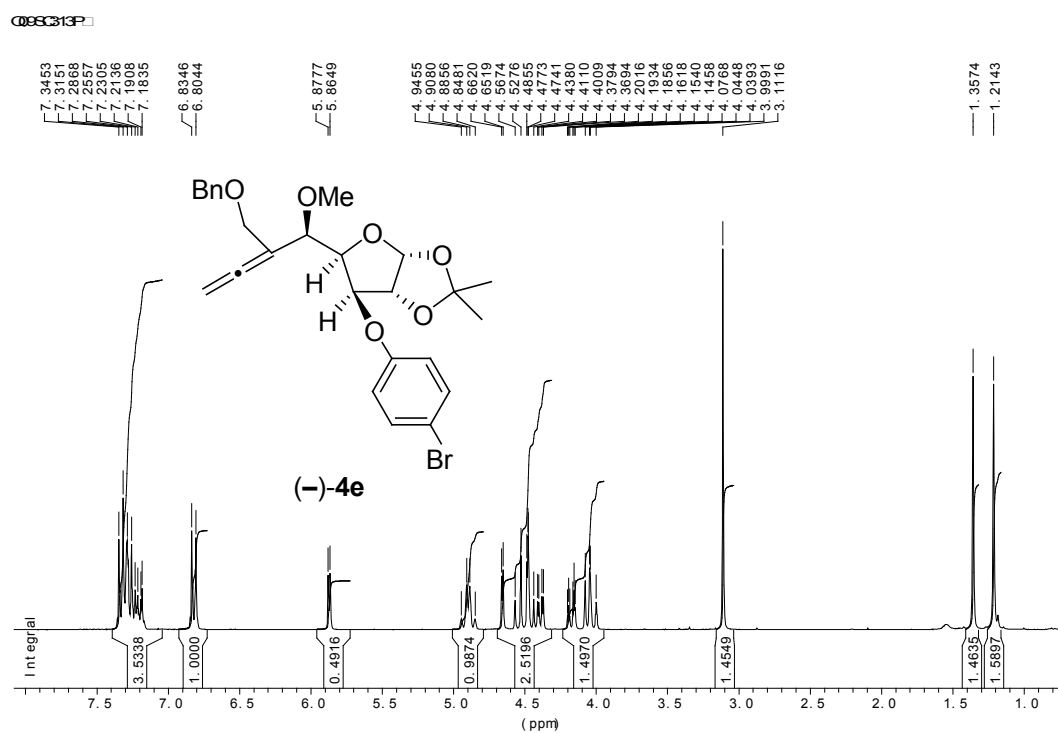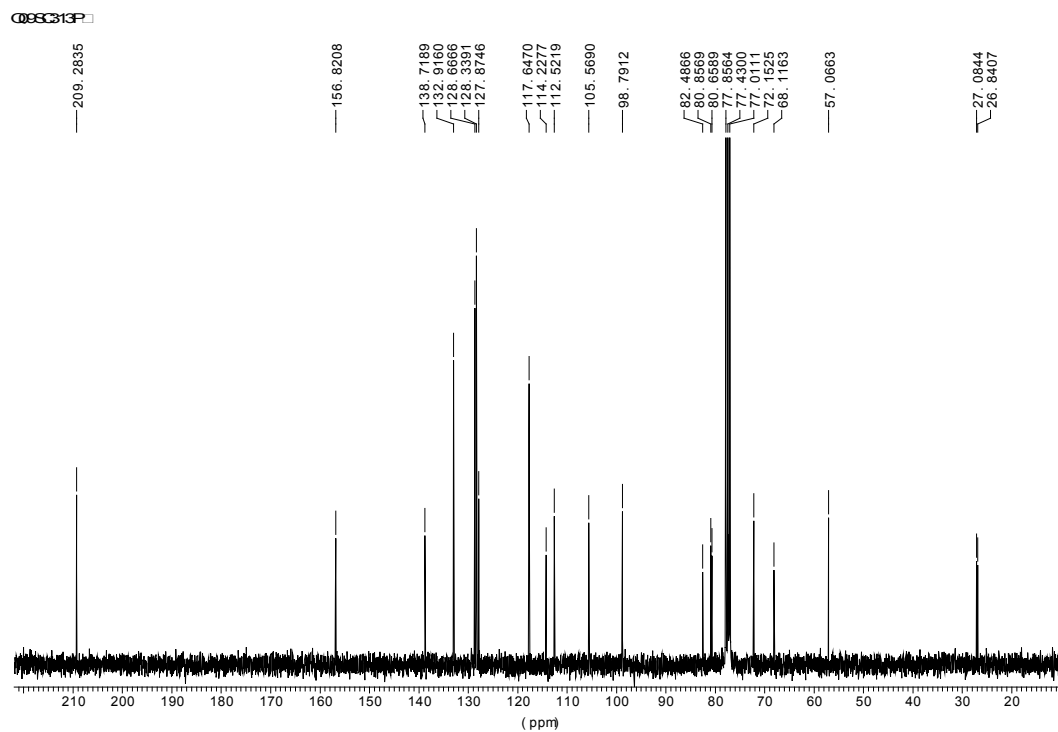

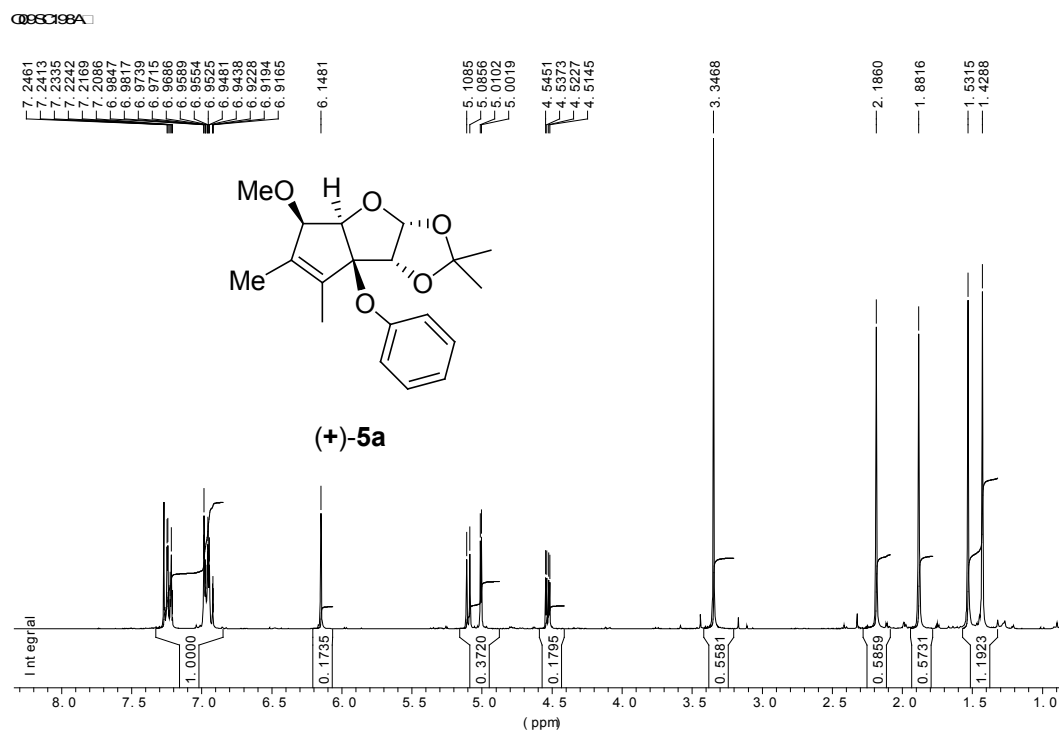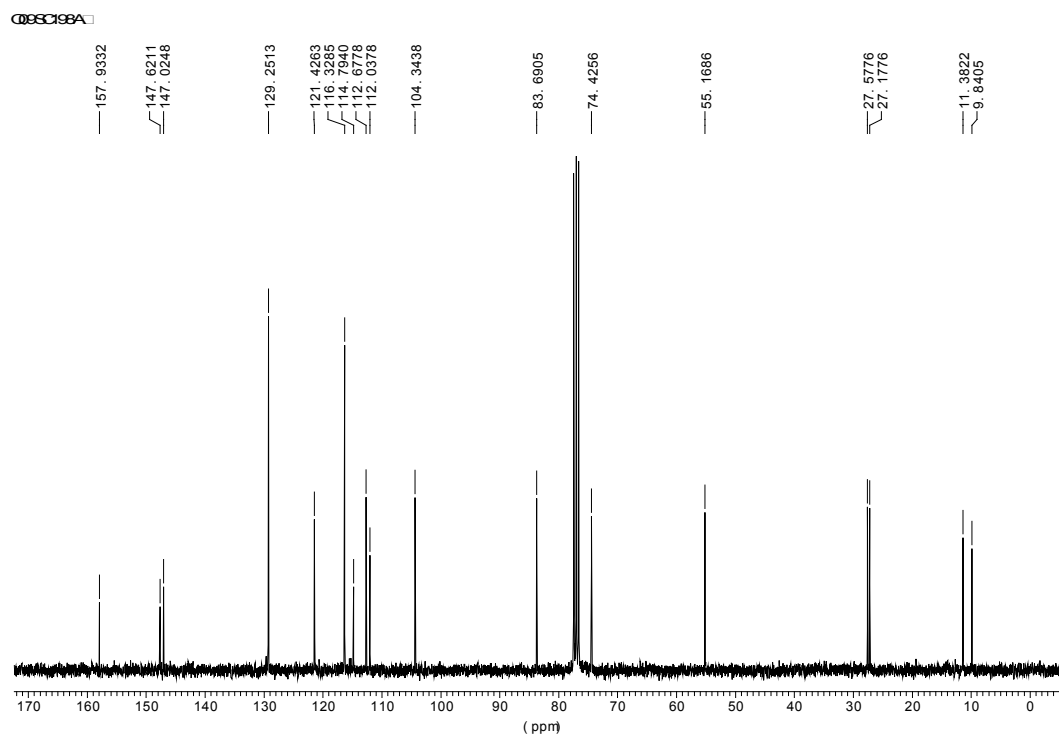

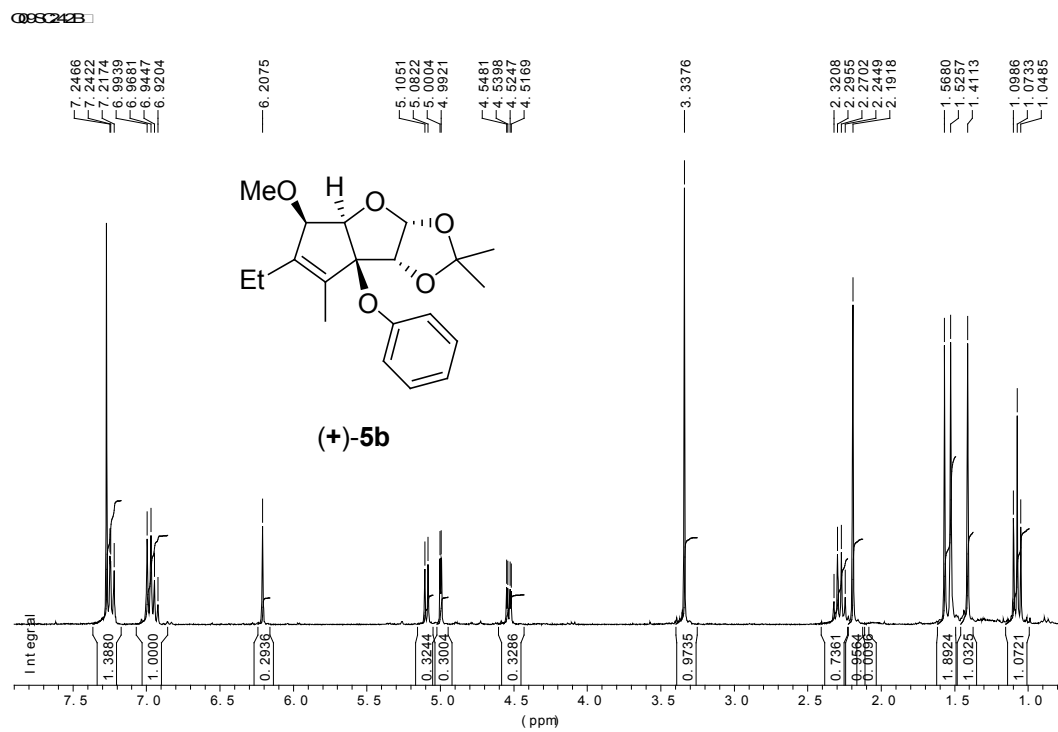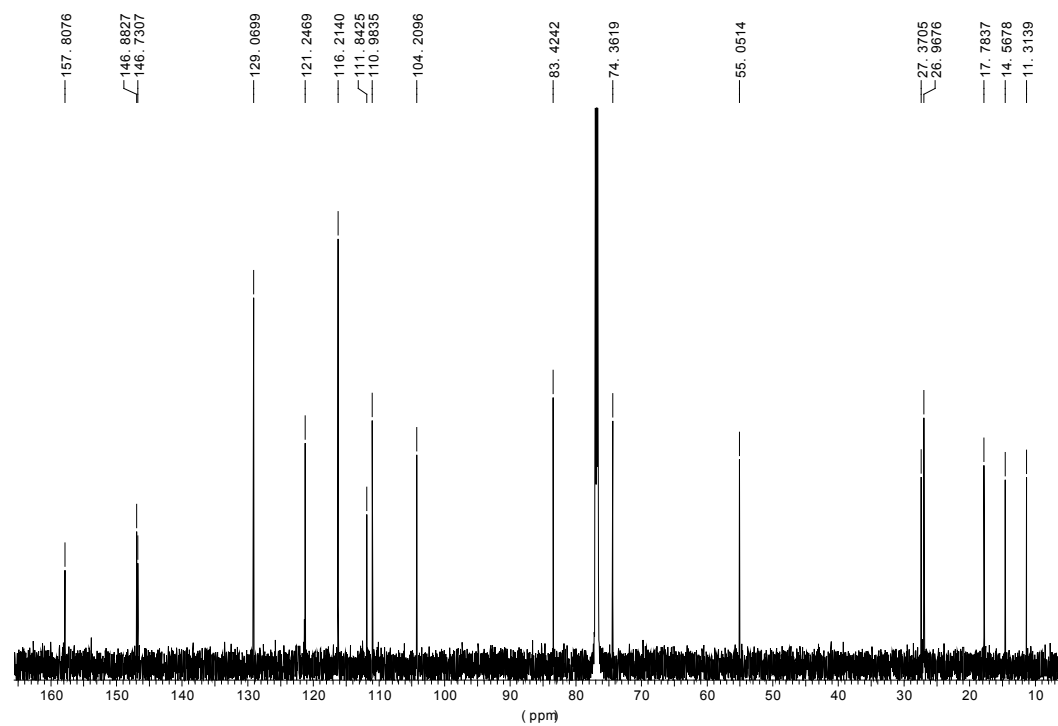



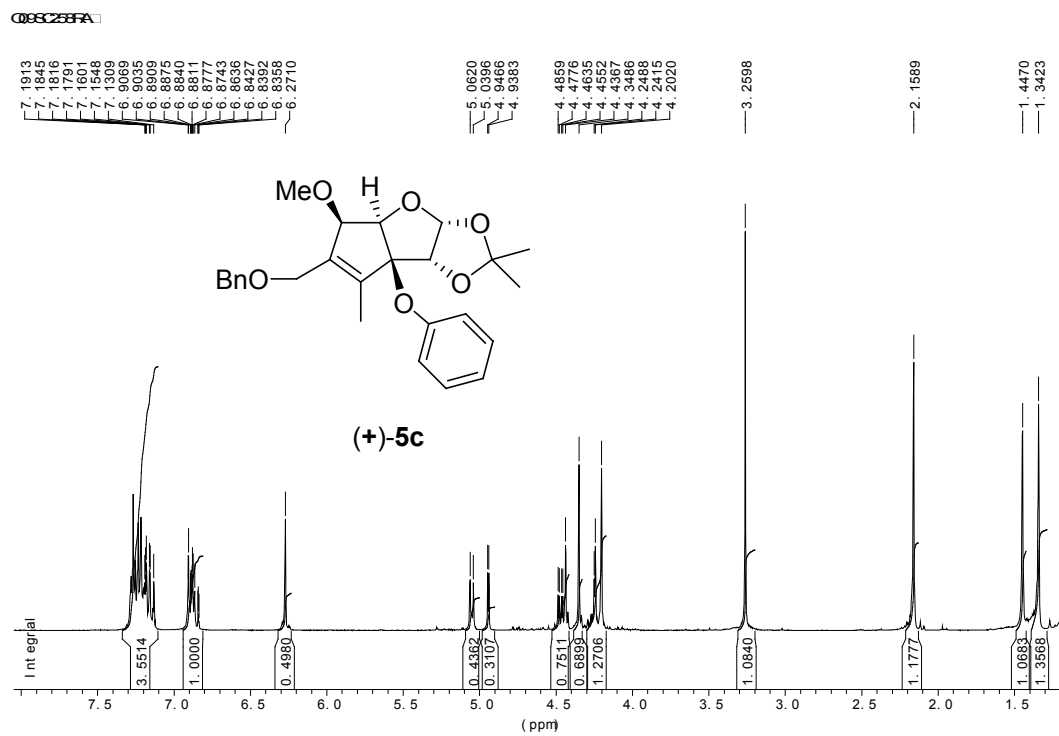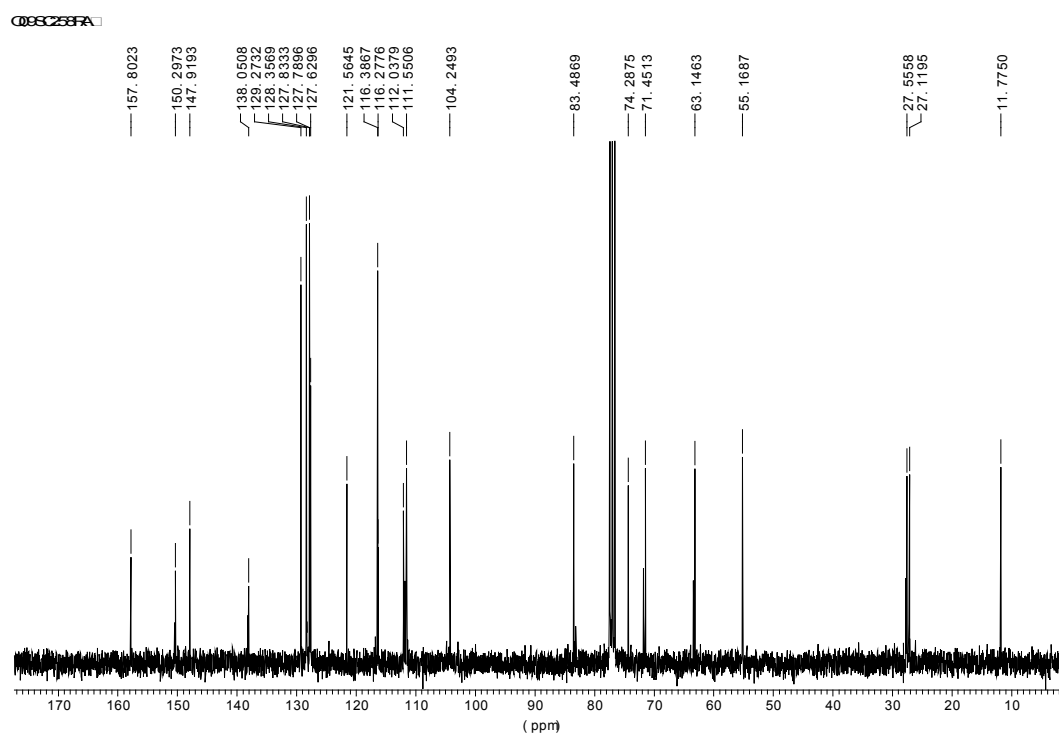

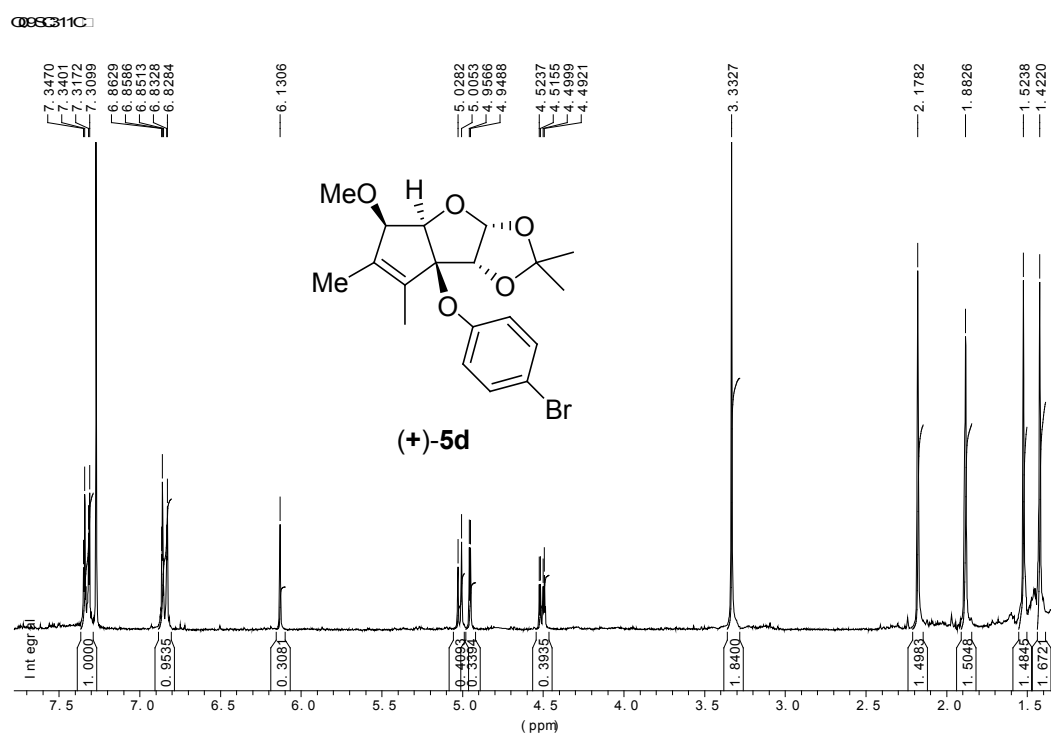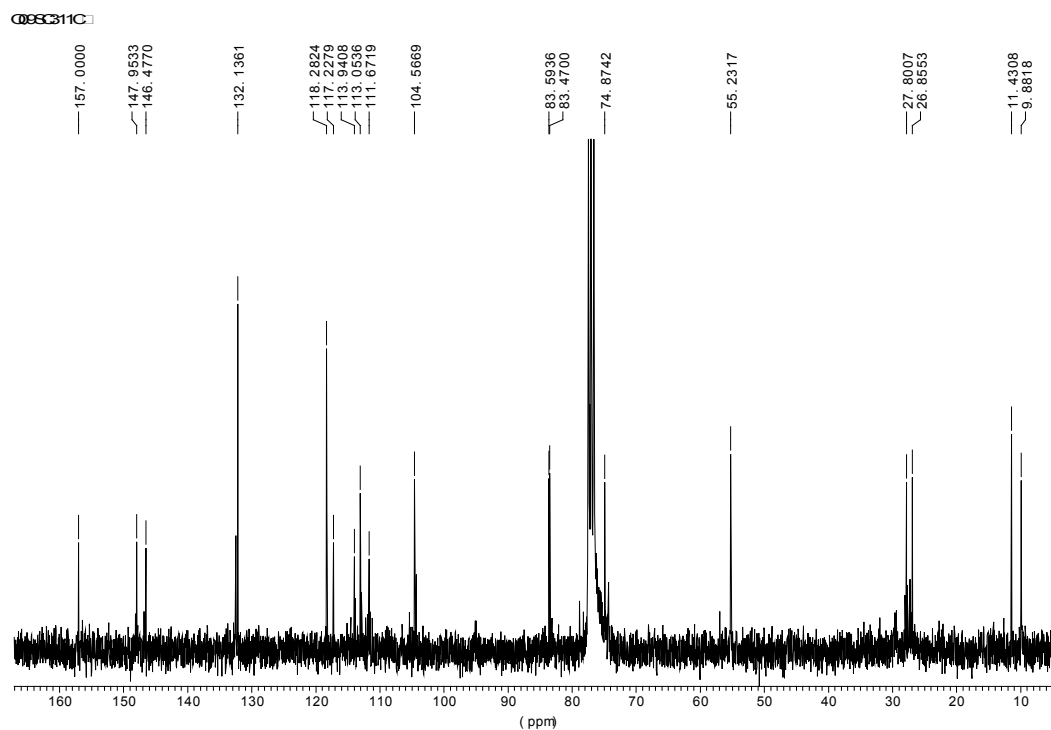

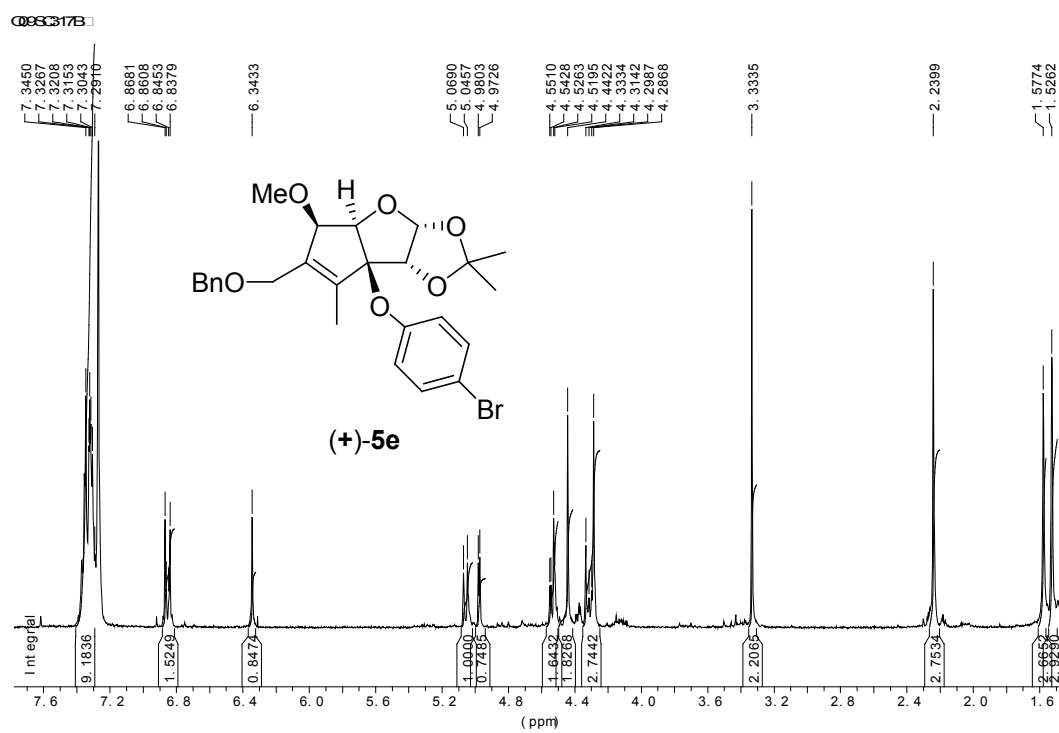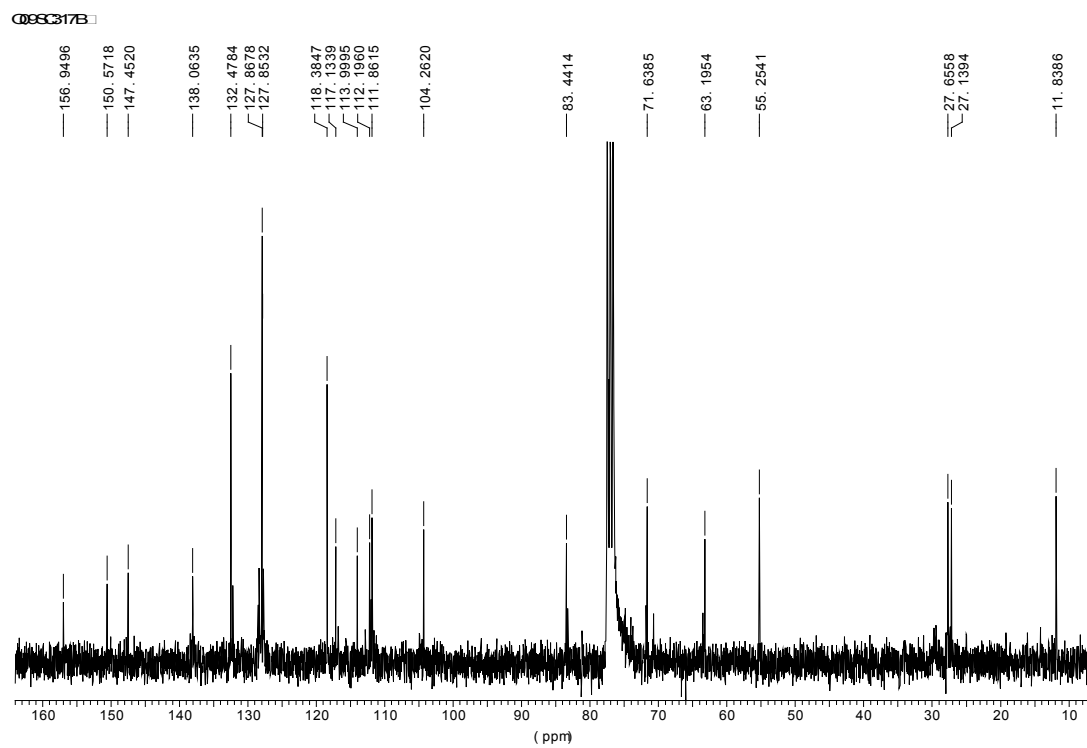

Supplement: c2cc37872h.pdf [file c2cc37872h.pdf]
